# Supplementary material for: Earth Observation in the EMMENA Region: Current Applications and Knowledge Gaps
Source: Preprints.org preprint supplement (doi:10.20944/preprints202307.0683.v1), 2023-07-11
Supplement: Supplementary file 3 [file supplementary]

## Sheet: TITLE
Supplementary materian on: "Earth Observation in the EMMENA region: Current applications and knowledge gaps" Marinos Eliades 1,*, Silas Michaelides1, Evagoras Evagorou 1, Kyriaki Fotiou 1, Konstantinos Fragkos 1, Georgios Le-ventis 1, Christos Theocharidis 1, Constantinos Panagiotou 1, Michalis Mavrovouniotis1, Stelios Neophytides 1, Christia-na Papoutsa 1, Kyriacos Neocleous 1, Kyriacos Themisto…

## Sheet: EMMENA_EO_Publications
Table S1
N	Author Full Names	Article Title	Author Keywords	Abstract	Affiliations	Times Cited	DOI
1	Dabbeek, Jamal; Silva, Vitor	Modeling the residential building stock in the Middle East for multi-hazard risk assessment	Exposure; Residential buildings; Middle East; Multi-hazard; Flood; Earthquake	This study presents an exposure model for the residential building stock in the Middle East, developed for the purpose of multi-hazard risk assessment. The exposure model provides the number of buildings, number of dwellings and population in 12 countries with their corresponding physical characteristics, geographical location and economic value. The main sources of data used to develop this mode…	[Dabbeek, Jamal] Univ Sch Adv Studies IUSS, Pavia, Italy; [Silva, Vitor] Global Earthquake Model Fdn GEM, Pavia, Italy; [Silva, Vitor] Univ Fernando Pessoa, Fac Sci & Technol, Porto, Portugal	26	10.1007/s11069-019-03842-7
2	Almahasheer, Hanan	Spatial coverage of mangrove communities in the Arabian Gulf	Remote sensing; Mapping; Landsat; Avicennia marina; Rhizophora mucronata; Distribution; Satellite	Mangroves are the natural protectors of the coast, carbon sinks, and a nursery to many terrestrial as well as aquatic organisms. Different effects caused by natural forces together with anthropogenic factors have reduced mangrove cover on a global scale, yet little is known about the overall surface covered by mangroves in the Arabian Gulf. Therefore, the aim of this study was to examine their sp…	[Almahasheer, Hanan] Imam Abdulrahman Bin Faisal Univ IAU, Dept Biol, Coll Sci, Dammam 314411982, Saudi Arabia	31	10.1007/s10661-018-6472-2
3	Fradley, Michael; Simi, Francesca; Guagnin, Maria	Following the herds? A new distribution of hunting kites in Southwest Asia	Archaeology; Holocene humid period; hunting; Iraq; kite; Nafud; neolithic; Northern Arabia; remote sensing; Saudi Arabia; Southwest Asia	Remote-sensing analysis of open-source satellite imagery has identified a major, new distribution of undocumented hunting kite structures in northern Arabia. This new data has important implications on the environmental viability of hunting and on possible settlement patterns during the early and middle Holocene. Running across the eastern side of the Nafud Desert in Saudi Arabia, this research h…	[Fradley, Michael] Univ Oxford, EAMENA, 1-2 South Parks Rd, Oxford OX1 2JD, England; [Simi, Francesca] Univ Udine, Udine, Italy; [Guagnin, Maria] Max Planck Inst Sci Human Hist, Jena, Germany	1	10.1177/09596836221114290
4	Rousta, Iman; Olafsson, Haraldur; Nasserzadeh, Mohammad Hossein; Zhang, Hao; Krzyszczak, Jaromir; Baranowski, Piotr	Dynamics of Daytime Land Surface Temperature (LST) Variabilities in the Middle East Countries During 2001-2018	The Middle East; daytime LST; time series analysis; remote sensing; MODIS	The Middle East is an area characterized by strong gradients in meteorological conditions and varied land cover. As a result, some of the hottest places in the world as well as very cold areas can be found in this region. The objective of this paper is to quantitatively assess land surface temperature (LST) variations in the countries of the Middle East to estimate the trends and determine whethe…	[Rousta, Iman] Yazd Univ, Dept Geog, Yazd 8915818411, Iran; [Rousta, Iman] Univ Iceland, Inst Atmospher Sci Weather & Climate, Bustadavegur 7, IS-108 Reykjavik, Iceland; [Rousta, Iman; Olafsson, Haraldur] Iceland Meteorol Off IMO, Bustadavegur 7, IS-108 Reykjavik, Iceland; [Olafsson, Haraldur] Univ Iceland, Dept Phys, Inst Atmospher Sci Weather & Climate, Bustadavegur 7, IS-108 Reykjavik, Iceland…	2	10.1007/s00024-021-02765-4
5	Ozdemir, E. Tuncay; Korkmaz, Fatih M.; Yavuz, Veli	Synoptic analysis of dust storm over Arabian Peninsula: a case study on February 28, 2009	Arabian Peninsula; Hysplit; Rub'al Khali Desert; Sand storm; United Arab Emirates	Sand and dust storms are causing hazards and problems in aviation as well as the dangers and distresses they cause on living things. The low meteorological visibility, the presence of strong winds with gust, and the transport of dust and sand particles by the wind are dangerous on landing and departure of aircrafts, and even on planes that are parked. The main aim of the study is to examine the m…	[Ozdemir, E. Tuncay; Korkmaz, Fatih M.] Ataturk Airport Meteorol Off, Turkish State Meteorol Serv, TR-34149 Istanbul, Turkey; [Yavuz, Veli] Istanbul Tech Univ, Fac Aeronaut & Astronaut, Dept Meteorol Engn, ITU Maslak Campus, TR-34469 Istanbul, Turkey	7	10.1007/s11069-018-3226-y
6	Farahat, Ashraf	The Impact of the 2020 Oil Production Fluctuations on Methane Emissions over the Gulf Cooperation Council (GCC) Countries: A Satellite Approach	methane; oil production; GCC countries; air quality	The COVID-19 outbreak has significantly affected global industrial and transportation markets. Airlines, rails, and cars' industries and their supporting energy sectors have been substantially disrupted by the pandemic. This has resulted in undermined energy demand around the world during 2019 and 2020. The organization of the Petroleum Exporting Countries (OPEC) led by Saudi Arabia failed to per…	[Farahat, Ashraf] King Fahd Univ Petr & Minerals, Coll Gen Studies, Dept Phys, Dhahran 31261, Saudi Arabia	1	10.3390/atmos13010011
7	Pilcher, Nicolas James; Antonopoulou, Marina A.; Rodriguez-Zarate, Clara Jimena; Al-Sareeria, Thuraya Said; Baldwin, Robert; Willson, Andrew; Willson, Maia Sarrouf	Wide-Scale Population Connectivity Revealed by Postnesting Migrations of Green Sea Turtles from Ras Al Hadd, Oman	satellite tracking; sea turtles; Chelonia mydas; India; Eritrea; United Arab Emirates; migration; spatial ecology	There is limited information on postnesting dispersal of green turtles Chelonia mydas from nesting sites in the Arabian region. Understanding habitat connectivity can promote effective conservation programs across a wider range of critical sea turtle habitats. We present postnesting migration data for 9 green turtles departing from Ras Al Iladd in Oman, one of the largest and most important nesti…	[Pilcher, Nicolas James] Marine Res Fdn, Kota Kinabalu, Sabah, Malaysia; [Antonopoulou, Marina A.; Rodriguez-Zarate, Clara Jimena] Emirates Nat WWF, Abu Dhabi, U Arab Emirates; [Al-Sareeria, Thuraya Said] Minist Environm & Climate Affairs, Muscat, Oman; [Baldwin, Robert; Willson, Andrew] Five Oceans Environm Serv LLC, Muscat, Oman; [Willson, Maia Sarrouf] Environm Soc Oman, Muscat, Oman	2	10.2744/CCB-1462.1
8	Alhuwail, Dari; AlSharrah, Saad; Coffee, Neil T.; Al-Refaei, Faisal H.; Daniel, Mark	Place and Health Infrastructure in the Gulf Cooperation Council: A Systematic Scoping Review of GIS Applications in Health	Geographic Information Systems; Gulf Cooperation Council; Health; Place; Public Health; Healthcare; Kuwait; Oman; Kingdom of Saudi Arabia; United Arab Emirates; Bahrain; Qatar	The rising burden of non-communicable diseases is taxing health systems globally. Using data science and information systems is necessary to support public health practices. Geographic Information Systems (GIS) are key to inform and help guide public health policies related to place (i.e. location or where one lives) and how it affects health. Despite the increasing use of GIS for public health g…	[Alhuwail, Dari] Kuwait Univ, Coll Life Sci, Dept Informat Sci, POB 5969, Safat 13060, Kuwait; [Alhuwail, Dari; AlSharrah, Saad; Coffee, Neil T.; Al-Refaei, Faisal H.; Daniel, Mark] Dasman Diabet Inst, GeoHlth Lab, Kuwait, Kuwait; [AlSharrah, Saad; Coffee, Neil T.; Daniel, Mark] Univ Canberra, UC Hlth Res Inst, Canberra, ACT, Australia	0	10.4081/gh.2020.887
9	Jaad, Ahmed; Abdelghany, Khaled	The story of five MENA cities: Urban growth prediction modeling using remote sensing and video analytics	Urban growth prediction; Machine learning; Convolutional neural networks; Video prediction; Remote sensing; Middle East and North Africa (MENA) Region	Most urban areas in the Middle East and North Africa (MENA) region have experienced unprecedented growth rates over the past few decades to absorb population increase and hefty migration from surrounding rural and/or politically unstable areas. Such expedited urbanization presents substantial stresses to these urban areas' ecological and financial resources, as well as to the overall well-being o…	[Abdelghany, Khaled] Southern Methodist Univ, Dept Civil & Environm Engn, POB 750340, Dallas, TX 75275 USA; [Jaad, Ahmed] Umm Al Qura Univ, Coll Engn & Islamic Architecture, Fac Islamic Architecture, POB 5555, Mecca, Saudi Arabia	5	10.1016/j.cities.2021.103393
10	Al-Dousari, Ali; Omar, Ali; Al-Hemoud, Ali; Aba, Abdulaziz; Alrashedi, Majid; Alrawi, Mohamad; Rashki, Alireza; Petrov, Peter; Ahmed, Modi; Al-Dousari, Noor; Baloshi, Omar; Jarba, Meshael; Esmail, Ala; Alsaleh, Abeer; William, Teena	A Success Story in Controlling Sand and Dust Storms Hotspots in the Middle East	climate change; dust; sand and dust storms; hotspot; Iraq; Iran; Kuwait; UAE; Middle East	Using 30 years of satellite observations, two sand and dust storms (SDS) source locations (hotspots) were detected on the southern side of the Mesopotamian Flood Plain. Around 40 million people in the region are affected by the two hotspots, including populations in Iraq, Iran, Kuwait, Saudi Arabia, Qatar, Bahrain, and Emirates. Both hotspots encompass roughly 8212 km(2) and contribute 11% to 85%…	[Al-Dousari, Ali; Al-Hemoud, Ali; Aba, Abdulaziz; Petrov, Peter; Ahmed, Modi; Al-Dousari, Noor; Baloshi, Omar; Jarba, Meshael; Alsaleh, Abeer; William, Teena] Kuwait Inst Sci Res, Environm & Life Sci Res Ctr, POB 24885, Kuwait, Kuwait; [Omar, Ali] NASA, Langley Res Ctr, Hampton, VA 23681 USA; [Alrashedi, Majid; Esmail, Ala] Kuwait Inst Sci Res KISR, Energy & Bldg Res Ctr, POB 24885, Kuwait, Kuwai…	3	10.3390/atmos13081335
11	Mansour, Shawky; Saleh, Emad; Al-Awadhi, Talal	The Effects of Sociodemographic Characteristics on Divorce Rates in Oman: Spatial Modeling of Marital Separations	demographic characteristics; divorce rates; GIS; Oman; spatial modeling	Divorce and family dissolution are global issues linked to various socioeconomic, demographic, and spatial variables. In the last decade, the divorce rate has increased dramatically across the Gulf Cooperation Council (GCC) states (Bahrain, Kuwait, Qatar, Oman, the United Arab Emirates, and Saudi Arabia). Rapid economic development, social transformation, and modernization have directly led to de…	[Mansour, Shawky] Sultan Qaboos Univ, Coll Arts & Social Sci, Dept Geog, GIS, Muscat 123, Oman; [Mansour, Shawky] Alexandria Univ, Alexandria, Egypt; [Saleh, Emad] Sultan Qaboos Univ, Coll Arts & Social Sci, Muscat 123, Oman; [Al-Awadhi, Talal] Sultan Qaboos Univ, GIS, Muscat 123, Oman; [Al-Awadhi, Talal] Sultan Qaboos Univ, Dept Geog, Muscat 123, Oman	2	10.1080/00330124.2020.1730196
12	Abrams, William; Ghoneim, Eman; Shew, Roger; LaMaskin, Todd; Al-Bloushi, Khalid; Hussein, Saber; AbuBakr, Mostafa; Al-Mulla, Esam; Al-Awar, Meshgan; El-Baz, Farouk	Delineation of groundwater potential (GWP) in the northern United Arab Emirates and Oman using geospatial technologies in conjunction with Simple Additive Weight (SAW), Analytical Hierarchy Process (AHP), and Probabilistic Frequency Ratio (PFR) techniques	Hydrology; Geohydrology; remote sensing; GIS; MODIS; ASTER; Cool thermal anomaly	In the United Arab Emirates (UAE) and Oman, an arid climate coupled with rising populations have placed increased demand on scarce water resources. This study performs groundwater prospecting in the northern UAE and Oman by delineating Groundwater Potential (GWP), the relative likelihood of a location to accumulate groundwater, by modelling the influence of physiographic variables affecting groun…	[Abrams, William; Ghoneim, Eman; Shew, Roger; LaMaskin, Todd] Univ North Carolina Wilmington, Dept Earth & Ocean Sci, Wilmington, NC USA; [Al-Bloushi, Khalid; Hussein, Saber] United Arab Emirates Univ, Dept Geol, Al Ain, U Arab Emirates; [AbuBakr, Mostafa] Al Azhar Univ, Dept Geol, Cairo, Egypt; [Al-Mulla, Esam] Sharjah Elect & Water Author, Sharjah, U Arab Emirates; [Al-Awar, Meshgan] Dubai Poli…	29	10.1016/j.jaridenv.2018.05.005
13	Khaki, Mehdi; Hoteit, Ibrahim	Monitoring water storage decline over the Middle East	Middle East; Water resources; Satellite remote sensing; Data assimilation; Land surface modelling; Water storage changes	Water scarcity and environmental challenges are affecting many parts of the world, particularly the arid Middle East region. Limited water resources, urbanization, groundwater over-extraction, and water usage for irrigation and agriculture have exacerbated the situation over this region and is risking the future development of its growing population. This study investigates the changes in various…	[Khaki, Mehdi] Univ Newcastle, Sch Engn, Callaghan, NSW, Australia; [Hoteit, Ibrahim] King Abdullah Univ Sci & Technol KAUST, Thuwal, Saudi Arabia	1	10.1016/j.jhydrol.2021.127166
14	Ghatee, Mohammad Amin; Taylor, Walter R.; Karamian, Mehdi	The Geographical Distribution of Cutaneous Leishmaniasis Causative Agents in Iran and Its Neighboring Countries, A Review	Leishmania tropica; Leishmania major; Iran; Turkey; Iraq; Afghanistan; Saudi Arabia; Syria	Leishmania tropica and Leishmania major are both the main cause of anthroponotic (ACL) and zoonotic cutaneous leishmaniasis (ZCL), respectively, in the Old World. Leishmania infantum and Leishmania donovani, which are important causes of visceral leishmaniasis, have also occasionally been reported in CL patients. The present study investigates the current distribution of causative species of CL i…	[Ghatee, Mohammad Amin] Yasuj Univ Med Sci, Cellular & Mol Res Ctr, Yasuj, Iran; [Ghatee, Mohammad Amin] Yasuj Univ Med Sci, Sch Med, Dept Parasitol, Yasuj, Iran; [Taylor, Walter R.] Mahidol Oxford Trop Med Res Unit, Clin Therapeut Unit, Bangkok, Thailand; [Taylor, Walter R.] Univ Oxford, Nuffield Dept Med, Ctr Trop Med & Global Hlth, Oxford, England; [Karamian, Mehdi] Birjand Univ Med Sci, Infec…	19	10.3389/fpubh.2020.00011
15	Zerbini, Andrea; Fradley, Michael	Higher Resolution Satellite Imagery of Israel and Palestine: Reassessing the Kyl-Bingaman Amendment	Earth observation; Kyl-Bingaman Amendment; Satellite imagery; Archaeology; Israel; Palestine; Open skies	Since 1997, the Kyl-Bingaman Amendment (KBA) to the 1997 U.S. National Defense Authorization Act has limited the availability of high-resolution satellite imagery over Israel and Palestine. Although this law only applies to the United States of America, as this country dominates the commercial market for satellite imagery, its impact is global. Since 2012, the KBA has become increasingly anachron…	[Zerbini, Andrea; Fradley, Michael] Univ Oxford, Sch Archaeol, 36 Beaumont St, Oxford OX1 2PG, England	19	10.1016/j.spacepol.2018.03.002
16	Elmahdy, Samy; Ali, Tarig; Mohamed, Mohamed	Regional Mapping of Groundwater Potential in Ar Rub Al Khali, Arabian Peninsula Using the Classification and Regression Trees Model	Saudi Arabia; remote sensing; groundwater; paleochannels; Umm Al Hiesh; CART model	Mapping of groundwater potential in remote arid and semi-arid regions underneath sand sheets over a very regional scale is a challenge and requires an accurate classifier. The Classification and Regression Trees (CART) model is a robust machine learning classifier used in groundwater potential mapping over a very regional scale. Ten essential groundwater conditioning factors (GWCFs) were construc…	[Elmahdy, Samy; Ali, Tarig] Amer Univ Sharjah, Dept Civil Engn, Coll Engn, GIS & Mapping Lab, POB 26666, Sharjah, U Arab Emirates; [Mohamed, Mohamed] United Arab Emirates Univ, Civil & Environm Engn Dept, POB 15551, Al Ain, U Arab Emirates; [Mohamed, Mohamed] United Arab Emirates Univ, Natl Water & Energy Ctr, POB 15551, Abu Dhabi, U Arab Emirates	8	10.3390/rs13122300
17	Theilen-Willige, Barbara; Wenzel, Helmut	Remote Sensing and GIS Contribution to a Natural Hazard Database in Western Saudi Arabia	W-Saudi Arabia; natural hazards; remote sensing; GIS	The most frequent disasters in Western Saudi Arabia are flash floods, earthquakes and volcanism, especially submarine volcanism potentially causing tsunamis in the Red Sea and submarine mass movements, dust storms and droughts. As the consequences and effects of the climate change are expected to have an increasing impact on the intensity and occurrence of geohazards as flash floods, length of dr…	[Theilen-Willige, Barbara] Tech Univ Berlin TU Berlin, Inst Appl Geosci, D-10587 Berlin, Germany; [Wenzel, Helmut] Wenzel Consulting Engineers GmbH, A-1180 Vienna, Austria	4	10.3390/geosciences9090380
18	Agoubi, Belgacem	A review: saltwater intrusion in North Africa's coastal areas-current state and future challenges	Groundwater; Coastal aquifer; Saltwater intrusion; Salinity; North Africa	North Africa coastline extends on 8955 km from Mauritania to Egypt. These areas continue to experience population and economic growth. North Africa coastal aquifers were exposed to an increase in groundwater salinity and seawater intrusion, which may contribute to economic crisis as a result of freshwater resources crisis. This work aims to explore the status and a holistic comprehending review o…	[Agoubi, Belgacem] Univ Gabes, Higher Inst Water Sci & Tech, Gabes, Tunisia	10	10.1007/s11356-021-12741-z
19	Repper, Rebecca; Kennedy, Melissa; McMahon, Jane; Boyer, David; Dalton, Matthew; Thomas, Hugh; Kennedy, David	Kites of AlUla County and the Harrat MODIFIER LETTER LEFT HALF RINGUwayrid, Saudi Arabia	Arabian shield; hunting; kites; remote sensing; Saudi Arabia	A comprehensive remote sensing survey of AlUla County in north-west Saudi Arabia has revealed 32 examples of the ancient, stone-built animal traps known as 'kites'. Noting that most (27) are located on the Harrat MODIFIER LETTER LEFT HALF RINGUwayrid, a satellite survey of parts of that lavafield outside of AlUla County was undertaken, identifying a further 175 kites. These show commonalities wit…	[Repper, Rebecca; Kennedy, Melissa; McMahon, Jane; Boyer, David; Dalton, Matthew; Thomas, Hugh; Kennedy, David] Univ Western Australia, Sch Humanities, Class & Ancient Hist, Perth, WA, Australia	2	10.1111/aae.12214
20	Murad, Abdulkader	Planning and location of health care services in Jeddah City, Saudi Arabia: Discussion of the constructive use of geographical information systems	GIS; Health services; Kernel density; Accessibility; Jeddah City; Saudi Arabia	Geographical information systems (GIS) is used for health care planning due to the increasing availability of geo-coded health data that is moving the field towards to health information systems. The aim of this paper is to present GIS applications for planning health services in Jeddah City. The discussion is focused on three major issues: i) identifying the location of health service facilities…	[Murad, Abdulkader] King Abdulaziz Univ, Fac Environm Design, Dept Urban & Reg Planning, POB 80210, Jeddah 21589, Saudi Arabia	0	10.4081/gh.2018.728
21	Fayaz, Mohammad	The lock-down effects of COVID-19 on the air pollution indices in Iran and its neighbors	COVID-19; Air quality; NO2; Aerosol index; Functional data analysis	Introduction The COVID-19 restrictions have a lot of various peripheral negative and positive effects, like economic shocks and decreasing air pollution, respectively. Many studies showed NO2 reduction in most parts of the world. Methods Iran and its land and maritime neighbors have about 7.4% of the world population and 6.3% and 5.8% of World COVID-19 cases and deaths, respectively. The air poll…	[Fayaz, Mohammad] Shahid Beheshti Univ Med Sci, Sch Allied Med Sci, Dept Biostat, Tehran, Iran	0	10.1007/s40808-022-01528-x
22	Jassas, Hussein A.; Al-Bahadily, Hayder A.; Al-Saady, Younus, I	Integrating hydrogeological, geophysical, and remote-sensing data to identify fresh groundwater resources in arid regions: a case study from Western Iraq	Groundwater; Magnetic; Gravity; DEM; Subsurface structures	There is a limited availability of fresh groundwater in the western part of Iraq due to the aridity of the region, and new water supplies are required to meet the demands of potential industrial, mining, and agricultural projects. Consequently, the factors that influence the quality, availability, and distribution of fresh groundwater in the region were assessed by combining hydrogeological, geop…	[Jassas, Hussein A.; Al-Bahadily, Hayder A.; Al-Saady, Younus, I] Iraq Geol Survey, Baghdad, Iraq	1	10.1007/s12665-019-8501-z
23	Mateos-Molina, D.; Pittman, S. J.; Antonopoulou, M.; Baldwin, R.; Chakraborty, A.; Garcia-Charton, J. A.; Taylor, O. J. S.	An integrative and participatory coastal habitat mapping framework for sustainable development actions in the United Arab Emirates	Mapping framework; Coastal habitats; Local ecological knowledge (LEK); Data integration; Arabian Gulf	Coastal habitat mapping is a potentially powerful enabling tool to inform the design of strategies and actions in coastal zone planning and management, biodiversity conservation and more recently for blue carbon accounting. Habitat mapping is typically carried out by experts in remote sensing and geographical information systems, and rarely integrates stakeholders' local ecological knowledge. To …	[Mateos-Molina, D.; Antonopoulou, M.; Chakraborty, A.] World Wide Fund Nat, Emirates Nat, POB 23304, Dubai, U Arab Emirates; [Mateos-Molina, D.; Garcia-Charton, J. A.] Univ Murcia, Dept Ecol & Hidrol, Murcia, Spain; [Pittman, S. J.] Univ Oxford, Sch Geog & Environm, Oxford Seascape Ecol Lab, Oxford OX1 3QY, England; [Pittman, S. J.] Seascape Analyt Ltd, Plymouth PL2 1RP, Devon, England; [Baldwin,…	2	10.1016/j.apgeog.2021.102568
24	Alarifi, Saad S.; Abdelkareem, Mohamed; Abdalla, Fathy; Alotaibi, Mislat	Flash Flood Hazard Mapping Using Remote Sensing and GIS Techniques in Southwestern Saudi Arabia	modeling; SRTM; Wadi Hali; runoff; satellite data; risk assessment; flood hazards	Flash flooding is one of the most significant natural disasters in arid/hyperarid regions and causes vast property damage and a large number of deaths. For mitigating and reducing flood risks, data from several remote sensing satellite images-Shuttle Radar Topography Mission (SRTM) Digital Elevation Model (DEM), Landsat 8 Operational Land Imager (OLI), and Tropical Rainfall Measuring Mission (TRM…	[Alarifi, Saad S.] King Saud Univ, Coll Sci, Dept Geol & Geophys, POB 2455, Riyadh 11451, Saudi Arabia; [Abdelkareem, Mohamed; Abdalla, Fathy] South Valley Univ, Geol Dept, Qena 83523, Egypt; [Alotaibi, Mislat] Univ Arkansas, Dept Geosci, Fayetteville, AR 72704 USA	1	10.3390/su142114145
25	Khedher, Khaled Mohamed; Yaseen, Zaher Munther; Qoradi, Mofareh D.; El Ouni, Mohamed Hechmi; Ben Kahla, Nabil; Alqadhi, Saeed; AlSubih, Majed; Laatar, Essaied; Elbarbary, Samah; Zaher, Mohamed Abdel	Integrated approach to evaluate unstable rocky slopes: case study of Aqabat Al-Sulbat road in Aseer Province, Saudi Arabia	Al-Salbat Road section; Natural triggered factors; Landsat8 and DTM; GIS; MCDM; DEM modeling	In this applied research work, the risk of rock instability in the Aqabat Al-Sulbat road section located in the north-west area of Aseer Province in Saudi Arabia was evaluated, and the primary natural trigger factors of rock slope instability on further environmental components (rock slope stability, road network, and urban areas) were estimated using satellite images (Landsat8), digital terrain …	[Khedher, Khaled Mohamed; El Ouni, Mohamed Hechmi; Ben Kahla, Nabil; Alqadhi, Saeed; AlSubih, Majed] King Khalid Univ, Coll Engn, Dept Civil Engn, Abha 61421, Saudi Arabia; [Khedher, Khaled Mohamed] Mrezgua Univ Campus, Dept Civil Engn, High Inst Technol Studies, Nabeul 8000, Tunisia; [Yaseen, Zaher Munther] Univ Kebangsaan Malaysia, Fac Sci & Technol, Dept Earth Sci & Environm, Bangi 43600, Sela…	1	10.1007/s11356-022-20130-3
26	Al-Shammari, Sultan; Ko, Wonsuk; Al Ammar, Essam A.; Alotaibi, Majed A.; Choi, Hyeong-Jin	Optimal Decision-Making in Photovoltaic System Selection in Saudi Arabia	PV system location; geographical information system (GIS); multi-criteria decision making (MCDM); analytic hierarchy process (AHP); the order preference by similarity to ideal solution (TOPSIS)	In this study, optimal decision-making process in photovoltaic (PV) system location selection in Saudi Arabia is described. First, to identify the criteria that influence the decision of selecting a suitable location for the PV system, the geographical information system (GIS)-based multi-criteria decision making (MCDM) approach is used. Next, to assess the weights of the criteria that present di…	[Al-Shammari, Sultan; Ko, Wonsuk; Al Ammar, Essam A.; Alotaibi, Majed A.] King Saud Univ, Dept Elect Engn, Fac Engn, Riyadh 11421, Saudi Arabia; [Choi, Hyeong-Jin] GS E&C Corp, GS E&C Inst, 33 Jong Ro, Seoul 03159, South Korea	9	10.3390/en14020357
27	Awad, Awad M.; Owayss, Ayman A.; Iqbal, Javaid; Raweh, Hael S. A.; Alqarni, Abdulaziz S.	GIS Approach for Determining the Optimum Spatiotemporal Plan for Beekeeping and Honey Production in Hot-Arid Subtropical Ecosystems	bee forage; remote sensing; geographical information system; honey flow	Remote sensing (RS) and geographical information system (GIS) technology have seldom been used in apiculture. We applied these tools to map the optimum honey bee colony carrying capacity and estimate honey production during the honey flow of 'Talh' trees (Acacia gerrardii Benth. [Fabaceae: Mimosoideae]) in the Rawdat-Khuraim oasis, central Saudi Arabia. A SPOT 5 panchromatic image (2.5-m resoluti…	[Awad, Awad M.; Owayss, Ayman A.; Iqbal, Javaid; Raweh, Hael S. A.; Alqarni, Abdulaziz S.] King Saud Univ, Coll Food & Agr Sci, Dept Plant Protect, POB 2460, Riyadh 11451, Saudi Arabia; [Iqbal, Javaid] MNS Univ Agr, Dept Entomol, Multan, Pakistan	2	10.1093/jee/toz002
28	Zerbini, Andrea	Developing a Heritage Database for the Middle East and North Africa	Arches; web mapping; open source; CIDOC CRM; remote sensing	The Endangered Archaeology in the Middle East and North Africa (EAMENA) project based at the Universities of Oxford, Leicester, and Durham uses remote sensing to record archaeological and cultural heritage landscapes across twenty countries from Morocco to Iran and from Syria to Yemen. The project has developed an online heritage database built by adapting the open-source Arches heritage inventor…	[Zerbini, Andrea] Univ Oxford, Oxford, England	18	10.1080/00934690.2018.1514722
29	Ledari, Dorna Gholamzade; Hamidi, Mehdi; Shao, Yaping	Evaluation of the 13 April 2011 frontal dust storm in west Asia	Frontal dust storm; Numerical simulation; MODIS; CALIPSO; WRF-Chem	The dust storm is an important weather event in the Middle East and the frontal dust storms being the most prominent ones in the non-summer seasons. In this research, the 13 April 2011 frontal dust storm in the Middle East is studied in detail. The analysis is based on satellite images, aerosol index, synoptic data, and numerical simulation using the WRF-Chem model. It is estimated that in this e…	[Ledari, Dorna Gholamzade; Hamidi, Mehdi] Babol Noshirvani Univ Technol, Fac Civil Engn, Babol Sar, Iran; [Shao, Yaping] Univ Cologne, Inst Geophys & Meteorol, Cologne, Germany	16	10.1016/j.aeolia.2020.100592
30	Zair, Wathek; Maxted, Nigel; Brehm, Joana Magos; Amri, Ahmed	Ex situ and in situ conservation gap analysis of crop wild relative diversity in the Fertile Crescent of the Middle East	Conservation; Gap analysis; Species richness; Complementary analysis; Genetic diversity	Crop wild relatives (CWRs) are important reservoirs of adaptive traits for crop breeding programmes. Both ex situ and in situ conservation approaches should be deployed to ensure CWR availability for use. This paper aims to (a) create a regional database of occurrence records for the 441 priority CWRs in the Fertile Crescent, (b) identify CWR-rich areas in the Fertile Crescent, (c) recommend loca…	[Zair, Wathek; Maxted, Nigel; Brehm, Joana Magos] Univ Birmingham, Sch Biosci, Birmingham, W Midlands, England; [Amri, Ahmed] Dry Areas ICARDA, Int Ctr Agr Res, Genet Resources Sect, Rabat, Morocco	10	10.1007/s10722-020-01017-z
31	Safa, Omar; Bouacha, Mohamed Islem; Soudani, Leila; Azzaoui, Mohamed Essalah; Chafaa, Meriem	FIRE RISK MAPPING IN THE SDAMAS CHERGUI FOREST IN TIARET REGION, ALGERIA	Forest fires; Forest Fire Risk index; GIS; Remote Sensing; Forest Fire sensitivity	Each year more than 20,000 hectares of forest are destroyed by fire in Algeria. Fires are costly in terms of human lives and property. The objective of the present work is to establish a forest fire risk map focused on the Sdamas Chergui state forest (Wilaya of Tiaret) through the application of the model established by Dagorne et al (1994), which consists in calculating the risk index of sensiti…	[Safa, Omar; Bouacha, Mohamed Islem; Soudani, Leila; Azzaoui, Mohamed Essalah; Chafaa, Meriem] Univ Tiaret, Lab Agrobiotechnol & Nutr Semiarid Zones, Fac Nat & Life Sci, Tiaret, Algeria	0	10.31407/ijees12.246
32	Yagoub, M. M.; Al Yammahi, Abdullah Amed	Spatial distribution of natural hazards and their proximity to heritage sites: Case of the United Arab Emirates	Heritage sites; Natural hazards; Remote sensing; GIS; UAE; Heritage sites; Natural hazards; Remote sensing; GIS; UAE	The United Nations Educational Scientific and Cultural Organization (UNESCO) investigated World Heritage sites and listed some in the United Arab Emirates (UAE). Heritage sites in any country have important cultural and economic value. However, many of the sites are subjected to potential impact by natural hazards, considering their age and the effects of climate. In the interest of reducing thes…	[Yagoub, M. M.; Al Yammahi, Abdullah Amed] UAE Univ, Coll Human & Social Sci, Master Program Remote Sensing & GIS, Dept Geog & Urban Sustainabil, POB 15551, Al Ain, U Arab Emirates	6	10.1016/j.ijdrr.2022.102827
33	Western, Luke M.; Ramsden, Alice E.; Ganesan, Anita L.; Boesch, Hartmut; Parker, Robert J.; Scarpelli, Tia R.; Tunnicliffe, Rachel L.; Rigby, Matthew	Estimates of North African Methane Emissions from 2010 to 2017 Using GOSAT Observations		Source characteristics of methane emissions in Africa are not well understood, despite methane's role as the second largest anthropogenic contributor to climate change. Here, we present monthly methane emission estimates from Algeria, Egypt, Libya, Morocco, and Tunisia between 2010 and 2017, a region dominated by anthropogenic emissions. Emissions are estimated using observations from the GOSAT s…	[Ramsden, Alice E.; Ganesan, Anita L.] Univ Bristol, Sch Geog Sci, Bristol BS8 1SS, Avon, England; [Boesch, Hartmut; Parker, Robert J.] Univ Leicester, Natl Ctr Earth Observat, Leicester LE1 7RH, Leics, England; [Boesch, Hartmut; Parker, Robert J.] Univ Leicester, Sch Phys & Astron, Earth Observat Sci, Leicester LE1 7RH, Leics, England; [Scarpelli, Tia R.] Harvard Univ, Earth & Planetary Sci, Cam…	5	10.1021/acs.estlett.1c00327
34	Abounoori, Esmaiel; Tour, Mansour	Stock market interactions among Iran, USA, Turkey, and UAE	Shock; Volatility; Stock; Iran; USA; Turkey; UAE; Multivariate GARCH	Due to advanced and progressive satellite digital communications not only economic but social and cultural changes from one country effects on other countries. These in turn affect not only the mean but also on variances of variables regarding the sizes of correlations and partial correlations between the internal and external variables. Therefore, information about the direction and intensity of…	[Abounoori, Esmaiel] Semnan Univ, Dept Econ, Econometr & Social Stat, Semnan, Iran; [Tour, Mansour] Semnan Univ, Dept Econ, Semnan, Iran	4	10.1016/j.physa.2019.04.232
35	Murad, Abdulkader; Khashoggi, Bandar Fuad	Using GIS for Disease Mapping and Clustering in Jeddah, Saudi Arabia	GIS; urban health; health clusters; kernel density; hotspot analysis	Geographic information systems (GIS) can be used to map the geographical distribution of the prevalence of disease, trends in disease transmission, and to spatially model environmental aspects of disease occurrence. The aim of this study is to discuss a GIS application created to produce mapping and cluster modeling of three diseases in Jeddah, Saudi Arabia: diabetes, asthma, and hypertension. Da…	[Murad, Abdulkader; Khashoggi, Bandar Fuad] King Abdulaziz Univ, Fac Architecture & Planning, Dept Urban & Reg Planning, Jeddah 21589, Saudi Arabia	16	10.3390/ijgi9050328
36	Kraberger, Simona; Kumari, Safaa G.; Najar, Asma; Stainton, Daisy; Martin, Darren P.; Varsani, Arvind	Molecular characterization of faba bean necrotic yellows viruses in Tunisia		Faba bean necrotic yellows virus (FBNYV) (genus Nanovirus; family Nanoviridae) has a genome comprising eight individually encapsidated circular single-stranded DNA components. It has frequently been found infecting faba bean (Vicia faba L.) and chickpea (Cicer arietinum L.) in association with satellite molecules (alphasatellites). Genome sequences of FBNYV from Azerbaijan, Egypt, Iran, Morocco, …	[Kraberger, Simona; Varsani, Arvind] Arizona State Univ, Sch Life Sci, Biodesign Ctr Fundamental & Appl Microbiom, Ctr Evolut & Med, Tempe, AZ 85287 USA; [Kumari, Safaa G.] ICARDA, Virol Lab, Tunis, Tunisia; [Kumari, Safaa G.] ICARDA, Dalia Bldg,2nd Floor,Bashir El Kassar St, Beirut 11082010, Lebanon; [Najar, Asma] Natl Inst Agron Res Tunisia, Lab Plant Protect, Rue Hedi Karray, El Menzah 1004, T…	10	10.1007/s00705-017-3651-3
37	Bashir, Rania Salah Eldien; Hassan, Osama Ahmed	A One Health perspective to identify environmental factors that affect Rift Valley fever transmission in Gezira state, Central Sudan	Rift Valley fever; One Health; Remote sensing; Geographical information system; Normalized Difference Vegetation Index; Soil type; Multilevel logistic regression; Gezira state; Sudan	Background Rift Valley fever (RVF) is a zoonotic viral vector-borne disease that affects both animals and humans and leads to severe economic consequences. RVF outbreaks are triggered by a favorable environment and flooding, which enable mosquitoes to proliferate and spread the virus further. RVF is endemic to Africa and has spread to Saudi Arabia and Yemen. There is great concern that RVF may sp…	[Bashir, Rania Salah Eldien] Minist Livestock, Anim Hlth Directorate, Gen Directorate Anim Hlth & Epizoot Dis Control, Khartoum, Sudan; [Hassan, Osama Ahmed] Univ Oslo, Dept Community Med & Global Hlth, Ctr Global Hlth, Fac Med, Oslo, Norway; [Hassan, Osama Ahmed] Umea Univ, Dept Clin Microbiol, Virol Unit, Fac Med, Umea, Sweden	3	10.1186/s41182-019-0178-1
38	Daoudi, Mohamed; Niang, Abdoul Jelil	Effects of geomorphological characteristics on urban expansion of Jeddah city-Western Saudi Arabia: a GIS and Remote Sensing Data-Based Study (1965-2020)	Urban growth; geomorphic hazards; spatial analysis; multisource data; Jeddah; Saudi Arabia	This study aims to highlight the natural risks induced by spatiotemporal interaction between the geomorphological features and the urban growth of Jeddah, the largest city in Makkah Province, Saudi Arabia. The methodology is based on remote sensing and Geographic Information System (GIS) techniques. A spatial analysis of the GIS layers extracted from multisource remotely sensed data from 1965 to …	[Daoudi, Mohamed] King Abdulaziz Univ, Fac Arts & Humanities, Dept Geog & GIS, Jeddah, Saudi Arabia; [Niang, Abdoul Jelil] Umm Al Qura Univ, Coll Social Sci, Dept Geog, Makkah Al Mukarramah, Saudi Arabia	0	10.1080/16583655.2022.2026616
39	Agapiou, Athos; Lysandrou, Vasiliki	Observing Thermal Conditions of Historic Buildings through Earth Observation Data and Big Data Engine	built heritage; historic buildings; thermal analysis; satellite data; Landsat space program; Google Earth Engine; Cyprus	This study combines satellite observation, cloud platforms, and geographical information systems (GIS) to investigate at a macro-scale level of observation the thermal conditions of two historic clusters in Cyprus, namely in Limassol and Strovolos municipalities. The two case studies share different environmental and climatic conditions. The former site is coastal, the last a hinterland, and they…	[Agapiou, Athos; Lysandrou, Vasiliki] Cyprus Univ Technol, Fac Engn & Technol, Dept Civil Engn & Geomat, Saripolou 2-8, CY-3036 Limassol, Cyprus; [Agapiou, Athos; Lysandrou, Vasiliki] Eratosthenes Ctr Excellence, Saripolou 2-8, CY-3036 Limassol, Cyprus	3	10.3390/s21134557
40	Hereher, Mohamed; El-Kenawy, Ahmed	Assessment of Land Degradation in Northern Oman Using Geospatial Techniques	Land degradation; NDVI; Remote sensing; GIS; MODIS products; Oman	The northern coast of Oman (Al-Batinah plain), hosts the major population and irrigated agriculture of the country. Recently, it has experienced considerable land degradation, revealed by an inland shifting of cultivation. The main objective of this study was to assess the magnitude of land degradation in the past 2 decades (2001-2019) using the integration of remote sensing and geographical info…	[Hereher, Mohamed; El-Kenawy, Ahmed] Sultan Qaboos Univ, Geog Dept, Coll Arts & Social Sci, Muscat, Oman; [Hereher, Mohamed] Damietta Univ, Dept Environm Sci, Fac Sci, New Damietta, Egypt; [El-Kenawy, Ahmed] Mansoura Univ, Geog Dept, Mansoura 35516, Egypt	7	10.1007/s41748-021-00216-7
41	Abd El Aal, A.; Kamel, M.; Al-Homidy, A.	Using Remote Sensing and GIS Techniques in Monitoring and Mitigation of Geohazards in Najran Region, Saudi Arabia	Geo-hazards; Mitigation; Remote sensing; GIS; Morphometric parameters; Wadi Najran; Saudi Arabia	Many sources of data (remote sensing and meteorological data, soils and groundwater samples) were used to estimate the magnitude of geological hazards, which are confirmed with field and laboratory investigation in Najran area, Kingdom Saudi Arabia. Najran area is one of these locations. It is subjected to a range of geo-hazards due to its intrinsic physiographic and geologic nature. Najran area …	[Abd El Aal, A.; Al-Homidy, A.] Najran Univ, Civil Engn Dept, Fac Engn, PO 1988, Najran, Saudi Arabia; [Abd El Aal, A.; Kamel, M.] Al Azhar Univ, Assiut Branch, Fac Sci, Geol Dept, Asyut, Egypt	3	10.1007/s10706-019-00861-w
42	Abdelkareem, Mohamed; Abdalla, Fathy	Revealing potential areas of water resources using integrated remote-sensing data and GIS-based analytical hierarchy process	Groundwater; modelling; remote sensing; GIS; AHP; MCDA; Al Kharj	In this article, a part of Wadi Al-Sahba, Saudi Arabia, is tested for revealing and modelling potential area of groundwater using integrated data derived from remote-sensing, geology and hydrology through GIS-based analytical hierarchy process method. Nine thematic maps e.g. geology, stream-networks, topography, slope, lineaments, depressions, radar intensity, rainfall and land use/cover that con…	[Abdelkareem, Mohamed; Abdalla, Fathy] South Valley Univ, Geol Dept, Qena, Egypt; [Abdelkareem, Mohamed] South Valley Univ, Remote Sensing Lab, Qena, Egypt; [Abdalla, Fathy] King Saud Univ, Sci Res, Riyadh, Saudi Arabia	4	10.1080/10106049.2021.2005155
43	Yousef, Latifa A.; Temimi, Marouane; Wehbe, Youssef; Al Mandous, Abdulla	Total cloud cover climatology over the United Arab Emirates	arid region; climatology; cloud cover; desert; ENSO; remote sensing; teleconnection	Cloud climatologies are of great importance in the study of cloud dynamics and interactions with land, oceans and atmosphere. This study analyzes the climatology of Total Cloud Cover (TCC) over the United Arab Emirates (UAE). Monthly mean TCC data between 1984 and 2009 from ground observations at six UAE airport stations and the satellite-based (CLARA A2) product are utilized. The hourly ground o…	[Yousef, Latifa A.; Temimi, Marouane; Wehbe, Youssef] Khalifa Univ, Masdar Inst, Dept Civil Infrastruct & Environm Engn, Abu Dhabi, U Arab Emirates; [Yousef, Latifa A.; Wehbe, Youssef; Al Mandous, Abdulla] Natl Meteorol Ctr, Dept Res Dev & Training, Abu Dhabi, U Arab Emirates	20	10.1002/asl.883
44	Al-Shammary, Sarteel Hamid Enad; Al-Mayyahi, Sattar Obaid Maiws	Application of Remote Sensing and GIS Techniques to Evaluate the Morphological Analysis of the Tehlawi River Basin, Diyala District, Eastern Iraq	Tehlawi River; morphometric; remote sensing; GIS.	In the Tahlawi River Basin in Diyala Province in eastern Iraq and the corresponding areas in Iran, GIS and remote sensing approaches are used to classify the morphological characteristics of watersheds and assess their characteristics. Morphometric parameters such as aerial and linear aspects of the basin of the Tahlawi River were determined and measured. The drainage pattern of the river is dend…	[Al-Shammary, Sarteel Hamid Enad; Al-Mayyahi, Sattar Obaid Maiws] Univ Wasit, Coll Sci, Dept Geol, Wasit, Iraq	0	10.3233/AJW220079
45	Benjmel, Khalid; Amraoui, Fouad; Boutaleb, Said; Ouchchen, Mohammed; Tahiri, Amine; Touab, Amine	Mapping of Groundwater Potential Zones in Crystalline Terrain Using Remote Sensing, GIS Techniques, and Multicriteria Data Analysis (Case of the Ighrem Region, Western Anti-Atlas, Morocco)	Ighrem; Arghen basin; hydrogeology of fractured environments; GIS; remote sensing; multicriteria analysis	This research work is intended as a contribution to the development of a multicriteria methodology, combining several factors to control the availability of groundwater resources, in order to optimize the choice of location of future drilling and increase the chances to take water from productive structures which will satisfy the ever-increasing water demand of local population (Arghen basin in t…	[Benjmel, Khalid; Amraoui, Fouad; Tahiri, Amine] Hassan II Univ, Fac Sci Ain Chock, Lab Geosci Appl Engn Dev GAIA, Casablanca 20150, Morocco; [Boutaleb, Said; Ouchchen, Mohammed; Touab, Amine] Ibn Zohr Univ, Lab Appl Geol & Geoenvironm, Fac Sci, Agadir 80000, Morocco	62	10.3390/w12020471
46	Hereher, Mohamed E.	Climate Change during the Third Millennium-The Gulf Cooperation Council Countries	greenhouse gases; geospatial analysis; remote sensing; Arabian Peninsula	The Gulf Cooperation Council (GCC) is a union occurring in the arid subtropical belt of the world. Contemporary climate change is a serious environmental issue at the regional and global levels. The main purpose of this study was to investigate the changes and trends in the regional climate in the GCC countries in terms of the land surface temperatures and surface anomalies, precipitation, and se…	[Hereher, Mohamed E.] Damietta Univ, Fac Sci, Dept Environm Sci, New Damietta 34517, Egypt; [Hereher, Mohamed E.] Sultan Qaboos Univ, Coll Arts & Social Sci, Geog Dept, Muscat 123, Oman	0	10.3390/su142114181
47	Saeifar, Mohammad Hamed; Alijani, Bohloul	Detection of Dust Storm Origins in the Middle East by Remotely Sensed Data	Dust storms; Image processing techniques; Dust origins; Differential index; Threshold limit	Dust storms are one of the most common natural phenomena in the arid and semiarid regions. Long periods of drought and inappropriate land management practices, by removing soil moisture and vegetation cover, can make these region more susceptible to the occurrence dust storms. Over the last few years in the Middle East, the intensity and frequency of this phenomenon have increased, interrupting d…	[Saeifar, Mohammad Hamed] Kharazmi Univ, Tehran, Iran; [Alijani, Bohloul] Kharazmi Univ, Ctr Excellence Spatial Anal Environm Hazards, Tehran, Iran	3	10.1007/s12524-019-01030-5
48	Shrahily, Raid Yahia; Alsharif, Mohammad Ambarak; Mobarak, Babikir Ahmed; Alzandi, Abdulrhman Ali	Land Cover Mapping Using GIS and Remote Sensing Databases for Al Baha Region Saudi Arabia	land cover; remote sensing; GIS; crops; water bodies; built area; bare ground; Saudi Arabia	Land cover assessment plays a vital role in both current and future planning and use of natural resources for sustainable development for any country. For the good practice of the vision 2030 in Al Baha region (south-western Saudi Arabia), land cover was assessed, classified, and analyzed using remote sensing databases and time series analysis combined with spatial analysis in geographic informat…	[Shrahily, Raid Yahia; Alsharif, Mohammad Ambarak] Al Baha Univ, Coll Engn, Dept Architecture, Prince Mohammad Bin Saud Rd, Al Baha 65527, Saudi Arabia; [Mobarak, Babikir Ahmed] Al Baha Univ, Coll Engn, Dept Civil Engn, Prince Mohammad Bin Saud Rd, Al Baha 65527, Saudi Arabia; [Alzandi, Abdulrhman Ali] Al Baha Univ, Fac Arts & Sci Qilwah, Biol Dept, POB 1988, Qilwah, Saudi Arabia	2	10.3390/app12168115
49	Cuca, B.; Agapiou, A.	Impact of land-use change and soil erosion on cultural landscapes: the case of cultural paths and sites in Paphos district, Cyprus	Soil erosion; Land-use change; RUSLE; C-factor; GIS; Cultural landscapes; Earth observation; Satellite remote sensing; Landsat; Sentinel-2	Soil loss has been long characterized as one of the main threats of climate change with possible impact to natural and cultural heritage (UNESCO report 2006). This study illustrates how applied geomatics integrating earth observation and geographical information systems (GIS) can be used to quantify this threat in an UNESCO protected archeological site as well as on cultural routes such as the an…	[Cuca, B.] Politecn Milan, Dept Architecture Built Environm & Construct Engn, Via Ponzio 31, I-20133 Milan, Italy; [Agapiou, A.] Cyprus Univ Technol, Dept Civil Engn & Geomat, Saripolou 2-8,3, CY-3036 Limassol, Cyprus	9	10.1007/s12518-018-0237-z
50	Al-Hemoud, Ali; Al-Dousari, Ali; Al-Dashti, Hassan; Petrov, Peter; Al-Saleh, Abeer; Al-Khafaji, Sarhan; Behbehani, Weam; Li, Jing; Koutrakis, Petros	Sand and dust storm trajectories from Iraq Mesopotamian flood plain to Kuwait	Dust storms; Mesopotamia; Sand dunes; Iraq; Kuwait	Although Kuwait is greatly impacted by sand and dust storms (SDS) from Southern Iraq, lo dale little is known about the nature of these storms. Kuwait is vulnerable to SDS trajectories from the middle Euphrates region, specifically, from two hot spot areas (AI-Batha and Mamlahat Al-Samawah) of 4550 km(2) located 250 km from its northern border. This study explores the transboundary SDS jets origi…	[Al-Hemoud, Ali; Al-Dousari, Ali; Petrov, Peter; Al-Saleh, Abeer] Kuwait Inst Sci Res, Environm & Life Sci Res Ctr, Crisis & Decis Support Program, POB 24885, Safat 13109, Kuwait; [Al-Dashti, Hassan] Directorate Gen Civil Aviat, Meteorol Dept, POB 35, Hawalli 32001, Kuwait; [Al-Khafaji, Sarhan] Al Muthanna Univ, Geog Dept, Samawah, Iraq; [Behbehani, Weam] Kuwait Inst Sci Res, Technoecon Div, Kuwa…	25	10.1016/j.scitotenv.2019.136291
51	Abdelkareem, Mohamed; Abdalla, Fathy; Mohamed, Samar Y.; El-Baz, Farouk	Mapping Paleohydrologic Features in the Arid Areas of Saudi Arabia Using Remote-Sensing Data	paleohydrology; ALOS/PALSAR; SRTM; Saudi Arabia	At present, the Arabian Peninsula is one of the driest regions on Earth; however, this area experienced heavy rainfall in the past thousand years. During this period, catchments received substantial amounts of surface water and sustained vast networks of streams and paleolakes, which are currently inactive. The Advanced Land Observing Satellite (ALOS) Phased Array Type L-band Synthetic Aperture R…	[Abdelkareem, Mohamed; Abdalla, Fathy; Mohamed, Samar Y.] South Valley Univ, Geol Dept, Fac Sci, Qena 83523, Egypt; [Abdelkareem, Mohamed] South Valley Univ, Remote Sensing Lab, Qena 83523, Egypt; [Abdalla, Fathy] King Saud Univ, Sci Res, Riyadh 68953, Saudi Arabia; [El-Baz, Farouk] Boston Univ, Ctr Remote Sensing, Boston, MA 02215 USA	8	10.3390/w12020417
52	Abadi, Abbas Ranjbar Saadat; Hamzeh, Nasim Hossein; Ooi, Maggie Chel Gee; Kong, Steven Soon-Kai; Opp, Christian	Investigation of Two Severe Shamal Dust Storms and the Highest Dust Frequencies in the South and Southwest of Iran	dust events; Shamal wind; NAAPS model; Persian Gulf Trough; west and south Iran	Dust storms create some of the most critical air quality problems in the world; the Middle East, located in the dust belt, suffers substantially from dust storms. Iran, as a country in the Middle East, is affected by dust storms from multiple internal and external sources that mostly originate from deserts in Iraq and Syria (especially the Mesopotamia region). To determine the highest dust loadin…	[Abadi, Abbas Ranjbar Saadat] Atmospher Sci & Meteorol Res Ctr ASMERC, Tehran 1497716385, Iran; [Hamzeh, Nasim Hossein] Air & Climate Technol Co ACTC, Dept Meteorol, Tehran 1599616313, Iran; [Ooi, Maggie Chel Gee] Univ Kebangsaan Malaysia, Inst Climate Change, Bangi 43600, Malaysia; [Kong, Steven Soon-Kai] Natl Cent Univ, Dept Atmospher Sci, Taoyuan 32001, Taiwan; [Opp, Christian] Philipps Univ M…	0	10.3390/atmos13121990
53	Aljenaid, Sabah S.; Kadhem, Ghadeer R.; AlKhuzaei, Manaf F.; Alam, Jobair B.	Detecting and Assessing the Spatio-Temporal Land Use Land Cover Changes of Bahrain Island During 1986-2020 Using Remote Sensing and GIS	Remote sensing; GIS; Land use land cover; Change detection; Chord diagrams; Bahrain	The Kingdom of Bahrain has experienced accelerated development growth since the 1980s. These rapid land demands increased the pressure on the country area to rebuild urban centers and cities surrounding the coast. The purpose of this research is to detect and investigate changes in land use and land cover (LULC), which is one of the most critical aspects of planning and managing the use of land a…	[Aljenaid, Sabah S.; Kadhem, Ghadeer R.] Arabian Gulf Univ, Coll Postgrad Studies, Dept Geoinformat, POB 2766, Manama, Bahrain; [AlKhuzaei, Manaf F.] Univ Brighton, Sch Environm & Technol, Brighton, E Sussex, England; [Alam, Jobair B.] IMS Engineers, Houston, TX USA	1	10.1007/s41748-022-00315-z
54	Karimi, Hazhir; Herki, Bengin M. A.; Gardi, Sirwa Qader; Galali, Saman; Hossini, Hooshyar; Mirzaei, Karamreza; Pirsaheb, Meghdad	Site selection and environmental risks assessment of medical solid waste landfill for the City of Kermanshah-Iran	Landfill; medical waste; geographical information system; remote sensing; multi-criteria evaluation	In this study, an integration of multi-criteria evaluation, geographic information system, and remote sensing techniques were used for site selection of medical waste landfills in Kermanshah, Iran. Also, an environmental risk assessment for the selected site has been conducted in order to minimize the possible hazardous. The GIS and remote sensing were used for acquiring and preparing layers and …	[Karimi, Hazhir] Univ Zakho, Dept Environm Sci, POB 12, Duhok, Kurdistan Regio, Iraq; [Herki, Bengin M. A.] Soran Univ, Fac Engn, Erbil, Kurdistan Regio, Iraq; [Herki, Bengin M. A.] Bayan Univ, Coll Sci & Engn, Erbil, Kurdistan Regio, Iraq; [Gardi, Sirwa Qader; Pirsaheb, Meghdad] Salahaddin Univ, Dept Geol Sci Coll, Erbil, Kurdistan Regio, Iraq; [Galali, Saman] Univ Tehran, Dept Environm Sci, Teh…	6	10.1080/09603123.2020.1742876
55	Kaplan, Gordana; Rashid, Tatjana; Gasparovic, Mateo; Pietrelli, Andrea; Ferrara, Vincenzo	Monitoring war-generated environmental security using remote sensing: A review	Earth observation; environmental degradation; environmental security; remote sensing; war	The negative impact humans have on the environment directly affects the environmental security. Over the years, it has been proven that wars make drastic and sometimes unrecoverable environmental damage. Remote sensing has played a main role in providing necessary data for spatiotemporal analysis. This paper reviews remote sensing implementation of war activities for environmental monitoring. Thi…	[Kaplan, Gordana] Eskisehir Tech Univ, Inst Earth & Space Sci, Eskisehir, Turkey; [Rashid, Tatjana] Ss Cyril & Methodius Univ Skopje, Inst Secur, Dept Secur, Def & Peace, Skopje, North Macedonia; [Gasparovic, Mateo] Univ Zagreb, Fac Geodesy, Chair Photogrammetry & Remote Sensing, Zagreb, Croatia; [Pietrelli, Andrea] Univ Lyon, Univ Claude Bernard Lyon 1, CNRS, Ecole Centrale Lyon, Villeurbanne, F…	0	10.1002/ldr.4249
56	Ivanov, Andrei Yu; Gerivani, Hadi	Oil leaking and seeping site in the Persian Gulf detected and studied by satellite observations	Persian Gulf; UAE waters; SAR and optical images; oil slicks; abandoned wells; oil seeps; hydrocarbon deposits	During remote monitoring of the Persian Gulf to detect oil spills, conducted from 2017 to 2019, leaking oil on the sea surface was observed at an offshore site. The site was located 26km west of the Sir Abu Nuyar Island in the waters of the United Arab Emirates. A more detailed analysis was conducted using remote sensing data, particularly synthetic aperture radar and optical images from the Sent…	[Ivanov, Andrei Yu] Russian Acad Sci, Shirshov Inst Oceanol, Moscow 117997, Russia; [Gerivani, Hadi] Iranian Natl Inst Oceanog & Atmospher Sci, Tehran, Iran	2	10.1080/1064119X.2020.1853286
57	Yousef, Latifa A.; Temimi, Marouane; Molini, Annalisa; Weston, Michael; Wehbe, Youssef; Al Mandous, Abdulla	Cloud Cover over the Arabian Peninsula from Global Remote Sensing and Reanalysis Products		Clouds - their coverage, nature, and interactions with the energy budget of the planet - represent one of the primary sources of uncertainty in future climate prediction. Despite the crucial role of desert clouds in the distribution of water and energy budgets, their climatology is still largely incomplete. With arid regions projected to become dryer under global warming conditions, understanding…	[Yousef, Latifa A.; Temimi, Marouane; Molini, Annalisa; Weston, Michael; Wehbe, Youssef] Khalifa Univ, Civil Infrastruct & Environm Engn Dept, Abu Dhabi, U Arab Emirates; [Yousef, Latifa A.; Wehbe, Youssef; Al Mandous, Abdulla] Natl Ctr Meteorol, Abu Dhabi, U Arab Emirates	13	10.1016/j.atmosres.2020.104866
58	Al-Ruzouq, Rami; Shanableh, Abdallah; Omar, Maher; Al-Khayyat, Ghadeer	Macro and micro geo-spatial environment consideration for landfill site selection in Sharjah, United Arab Emirates	Waste management; Remote sensing; Macro and micro; Fuzzy membership; AHP; GIS	Waste management involves various procedures and resources for proper handling of waste materials in compliance with health codes and environmental regulations. Landfills are one of the oldest, most convenient, and cheapest methods to deposit waste. However, landfill utilization involves social, environmental, geo-technical, cost, and restrictive regulation considerations. For instance, landfills…	[Al-Ruzouq, Rami; Shanableh, Abdallah; Omar, Maher; Al-Khayyat, Ghadeer] Univ Sharjah, Civil & Environm Engn Dept, POB 27272, Sharjah, U Arab Emirates	13	10.1007/s10661-018-6538-1
59	Mateos-Molina, Daniel; Antonopoulou, Marina; Baldwin, Rob; Bejarano, Ivonne; Burt, John A.; Garcia-Charton, Jose A.; Al-Ghais, Saif M.; Walgamage, Jayanthi; Taylor, Oliver J. S.	Applying an integrated approach to coastal marine habitat mapping in the north-western United Arab Emirates	Habitat mapping; Coastal marine habitats; Data integration; United Arab Emirates; Local ecological knowledge; Integrated approach; Innovative	Habitat mapping is essential for the management and conservation of coastal marine habitats. However, accurate and up-to-date habitat maps are rarely available for the marine realm. In this study, we mapped the coastal marine habitats of >400 km of coastline in the north-western United Arab Emirates (UAE) using a combination of data sources including remote sensing, extensive ground-truthing poin…	[Mateos-Molina, Daniel; Antonopoulou, Marina] Emirates Nat World Wide Fund, POB 454891, Dubai, U Arab Emirates; [Mateos-Molina, Daniel; Garcia-Charton, Jose A.] Univ Murcia, Dept Ecol & Hidrol, Campus Espinardo, Murcia 30100, Spain; [Baldwin, Rob; Walgamage, Jayanthi; Taylor, Oliver J. S.] Five Oceans Environm Serv LLC, POB 660, Muscat 131, Oman; [Bejarano, Ivonne] Amer Univ Sharjah, Biol Chem & …	13	10.1016/j.marenvres.2020.105095
60	Bachagha, Nabil; Luo, Lei; Wang, Xinyuan; Masini, Nicola; Moussa, Tababi; Khatteli, Houcine; Lasaponara, Rosa	Mapping the Roman Water Supply System of the Wadi el Melah Valley in Gafsa, Tunisia, Using Remote Sensing	Wadi el Melah; archaeological; water supply system; Roman; remote sensing; GIS	In recent years, very high-resolution satellite remote-sensing tools have been progressively used in archaeological prospecting to acquire information and improve documentation. Satellite remote sensing has also benefited from technical improvements, including better spectral and spatial resolution of sensors, which have facilitated the detection and discovery of unknown archaeological areas. Thi…	[Bachagha, Nabil; Luo, Lei; Wang, Xinyuan; Masini, Nicola; Lasaponara, Rosa] Chinese Acad Sci, Key Lab Digital Earth Sci, Aerosp Informat Res Inst AIR, Beijing 100094, Peoples R China; [Bachagha, Nabil] Univ Chinese Acad Sci, Beijing 100049, Peoples R China; [Luo, Lei; Wang, Xinyuan] UNESCO, Int Ctr Space Technol Nat & Cultural Heritage, Beijing 100094, Peoples R China; [Masini, Nicola] CNR, Inst…	4	10.3390/su12020567
61	Alhifany, Abdullah A.; Alqurashi, Abdullah F.; Al-Agamy, Mohamed H.; Alkhushaym, Nasser; Alhomoud, Faten; Alhomoud, Farah K.; Almangour, Thamer A.	Employment of Mapping Technology in Antimicrobial Resistance Reporting in Saudi Arabia	Antimicrobial resistance; Geographical information system; Enterobacteriaceae; Pseudomonas aeruginosa; Acinetobacter baumannii; Saudi Arabia	Although Antimicrobial Resistance (AMR) is a worldwide threat. local AMR databases do not exist. Unlike other health disasters, developing containment strategies for AMR cannot be started without a representative, local, updated AMR data. However, Geographical Information Systems (GIS) mapping technology is capable of visualizing AMR data integrated with geographical regions. Due to the absence o…	[Alhifany, Abdullah A.] Umm Al Qura Univ, Coll Pharm, Clin Pharm Dept, 13578 Taif Rd, Mecca 21955, Saudi Arabia; [Alqurashi, Abdullah F.] Umm Al Qura Univ, Dept Geog, Mecca, Saudi Arabia; [Al-Agamy, Mohamed H.] King Saud Univ, Coll Pharm, Microbiol & Immunol Dept, Riyadh, Saudi Arabia; [Alkhushaym, Nasser] Royal Commiss Hlth Serv Program, Dept Clin Pharm, Jubail Ind City, Saudi Arabia; [Alhomoud,…	3	10.4081/gh.2020.868
62	Kessar, Cherif; Benkesmia, Yamina; Blissag, Bilal; Kebir, Lahsen Wahib	Delineation of groundwater potential zones in Wadi Saida Watershed of NW-Algeria using remote sensing, geographic information system-based AHP techniques and geostatistical analysis	Wadi Saida Watershed; Groundwater potential mapping; Remote Sensing; GIS; Analytical Hierarchical Process; Geostatistic	Sustainable management of groundwater resources has now become an obligation, especially in arid and semi-arid regions given the socio-economic importance of this resource. The optimization in zoning for groundwater exploitation helps in planning and managing groundwater supply works such as boreholes and wells in the catchment. The objective of this study is to use remote sensing and GIS-based A…	[Kessar, Cherif; Benkesmia, Yamina; Blissag, Bilal; Kebir, Lahsen Wahib] Agence Spatiale Algerienne, Ctr Tech Spatiales, Arzew, Algeria	0	10.19637/j.cnki.2305-7068.2021.01.005
63	Murad, Abdulkader	Using GIS for Determining Variations in Health Access in Jeddah City, Saudi Arabia	GIS; health centers; network analysis; drive-time	The main objective of this paper is to use Geographical Information Systems (GIS) for identifying spatial accessibility to health centers in Jeddah City, Saudi Arabia based on the drive-time analysis technique. A geo-database was created that includes the location of health centers, population distribution, and road networks. ArcGIS Network Analyst and overlay analyses were selected as the analys…	[Murad, Abdulkader] King Abdulaziz Univ, Fac Environm Design, Dept Urban & Reg Planning, Jeddah 21589, Saudi Arabia	21	10.3390/ijgi7070254
64	Kabak, Mehmet; Ozceylan, Eren; Erbas, Mehmet; Cetinkaya, Cihan	A multi-criteria spatial analysis using GIS to evaluate potential sites for a new border gate on Turkey's Syria frontier	border check-point; GIS; multi-criteria decision making; MCDM; DEMATEL; MULTIMOORA; site location; Turkey; Syria	After the internal disturbance in Syria in 2011, many Syrian refugees migrated to Turkey progressively, and the Turkish Government provided humanitarian aid to people in Syria. These incidents caused a huge amount of density on current border gates. Also, increasing potential terrorist attacks and growing frontier infringements also create a need for a new border gate on Turkey's Syria frontier. …	[Kabak, Mehmet] Gazi Univ, Dept Ind Engn, Ankara, Turkey; [Ozceylan, Eren] Gaziantep Univ, Dept Ind Engn, Gaziantep, Turkey; [Erbas, Mehmet] Minist Natl Def, Gen Directorate Mapping, Ankara, Turkey; [Cetinkaya, Cihan] Adana Alparslan Turkes Sci & Technol Univ, Dept Management Informat Syst, Adana, Turkey	1	10.1504/EJIE.2020.107670
65	Boufekane, Abdelmadjid; Meddi, Hind; Meddi, Mohamed	Delineation of groundwater recharge zones in the Mitidja plain, north Algeria, using multi-criteria analysis	GIS; groundwater; Mitidja plain; multi-criteria analysis; recharge zones; remote sensing	This work aims to identify the potential groundwater recharge zones in the Mitidja plain (north Algeria) using the multi-criteria approach. The analysis was based on the use of a geographical information system (GIS) and remote sensing to establish eight thematic maps, weighted, categorized and inserted, that allowed us to establish the potential zones' map for groundwater recharge. Three potenti…	[Boufekane, Abdelmadjid; Meddi, Hind; Meddi, Mohamed] Ecole Natl Super Hydraul ENSH, GEE Lab, Blida, Algeria	5	10.2166/hydro.2020.082
66	Heidarian, Peyman; Azhdari, Ali; Joudaki, Mohammad; Khatooni, Javad Darvishi; Firoozjaei, Somaye Fathtabar	Integrating Remote Sensing, GIS, and Sedimentology Techniques for Identifying Dust Storm Sources: A Case Study in Khuzestan, Iran	Dust Storms; Dust Sources; Landsat Satellite; Spatial Analysis; Khuzestan Plain	There is an urgent need for zoning the dust sources, as the first step to control dust storms. Hence, this study aimed to identify the exact interior sources of dust in Khuzestan Province (Iran), using a hybrid method of remote sensing, GIS and sedimentology. To this end, the spatial data of pedology, landuse, climate, slope and sedimentology were used as the constraint layers and vegetation, lan…	[Heidarian, Peyman; Azhdari, Ali; Khatooni, Javad Darvishi; Firoozjaei, Somaye Fathtabar] Geol Survey & Mineral Explorat Southwest Reg, Ahvaz, Iran; [Joudaki, Mohammad] Geol Survey & Mineral Explorat Iran, Tehran, Iran	14	10.1007/s12524-018-0774-2
67	Skakni, Omar; Hlila, Rachid; Pour, Amin Beiranvand; Martin Martin, Manuel; Maate, Ali; Maate, Soufian; Muslim, Aidy M.; Hossain, Mohammad Shawkat	Integrating remote sensing, GIS and in-situ data for structural mapping over a part of the NW Rif belt, Morocco	Remote sensing; GIS; structural mapping; Calcareous Dorsal Complex; Morocco	This study adopts an integrated approach using the geographic information system (GIS) and remote sensing techniques for structural mapping in inaccessible zone of the internal segment of North-Western Rif belt, Morocco. The Principal Component Analysis (PCA), Optimal Index Factor (OIF), band ratios and directional filtering are applied to Landsat 8 OLI (Operational Land Imager) image for mapping…	[Skakni, Omar; Hlila, Rachid; Maate, Ali; Maate, Soufian] Univ Abdelmalek Essaadi, Fac Sci, Dept Geol, Lab Geol Environm, Tetouan, Morocco; [Pour, Amin Beiranvand; Muslim, Aidy M.; Hossain, Mohammad Shawkat] Univ Malaysia Terengganu UMT, Inst Oceanog & Environm INOS, Terengganu, Malaysia; [Martin Martin, Manuel] Univ Alicante, Fac Ciencias, Dept Ciencias Tierra & Medio Ambiente, Alicante, Spain	9	10.1080/10106049.2020.1852611
68	Kittelberger, Kyle D.; Buechley, Evan R.; Ford, Michael; Agirkaya, Kayahan; Hakki Sekercioglu, Cagan	First satellite-tracked migration of an Eurasian Thick-knee (Burhinus oedicnemus) in the Middle East ends in human-caused mortality	Falconry; hunting; satellite telemetry; movement ecology; Stone-curlew	Eurasian Thick-knee (Burhinus oedicnemus) is a widespread wading bird that occurs throughout much of Europe, the Middle East, and northern Africa. We captured a juvenile specimen at the Aras River Ornithological Research Station, Turkey in October 2019, fitted it with a GPS-GSM transmitter, and tracked its migration. The bird migrated from Turkey in late October, made an eight-day stopover in nor…	[Kittelberger, Kyle D.; Hakki Sekercioglu, Cagan] Univ Utah, Sch Biol Sci, Salt Lake City, UT 84112 USA; [Buechley, Evan R.] Smithsonian Migratory Bird Ctr, Washington, DC USA; [Buechley, Evan R.] HawkWatch Int, Salt Lake City, UT USA; [Agirkaya, Kayahan] KuzeyDoga Dernegi, Kars, Turkey; [Hakki Sekercioglu, Cagan] Koc Univ, Fac Sci, Istanbul, Sariyer, Turkey	1	10.1080/09397140.2021.1918183
69	Ben-Romdhane, Haifa; Jabado, Rima W.; Grandcourt, Edwin Mark; Perry, Richard John Obrien; Al Blooshi, Ayesha Yousef; Marpu, Prashanth Reddy; Ouarda, Taha B. M. J.; Ghedira, Hosni	Coral Reefs of Abu Dhabi, United Arab Emirates: Analysis of Management Approaches in Light of International Best Practices and a Changing Climate	coral reefs; United Arab Emirates (UAE); Abu Dhabi; practices; management	The coasts and islands that flank Abu Dhabi, the United Arab Emirates (UAE)'s largest emirate, host the country's most significant coastal and marine habitats including coral reefs. These reefs, although subject to a variety of pressures from urban and industrial encroachment and climate change, exhibit the highest thresholds for coral bleaching and mortality in the world. By reviewing and benchm…	[Ben-Romdhane, Haifa; Ghedira, Hosni] Khalifa Univ, Dept Civil Infrastruct & Environm Engn, Abu Dhabi, U Arab Emirates; [Jabado, Rima W.; Grandcourt, Edwin Mark; Al Blooshi, Ayesha Yousef] Environm Agcy, Terr & Marine Biodivers, Abu Dhabi, U Arab Emirates; [Jabado, Rima W.] Gulf Elasmo Project, Dubai, U Arab Emirates; [Perry, Richard John Obrien] Environm Agcy, Management Support Off, Abu Dhabi, …	3	10.3389/fmars.2020.00541
70	Anil, Ismail; Alagha, Omar; Blaisi, Nawaf, I; Mohamed, Iehab Abdelilah; Barghouthi, Mohammad Hisham; Manzar, Mohammad Saood	Source Identification of Episodic Rain Pollutants by a New Approach: Combining Satellite Observations and Backward Air Mass Trajectories	Source apportionment; Backward trajectory; Cluster analysis; Satellite observation; Rainwater chemical composition; Wet deposition flux	In this study, various source apportionment methods, viz., enrichment factor, relative source contribution, and factor analysis in addition to cluster analysis coupled with satellite observations, were used to investigate the origin of rainwater pollutants in an arid urban area of Saudi Arabia. The rainwater samples were collected by an automatic wet-only sequential rain sampler and analyzed for …	[Anil, Ismail; Alagha, Omar; Blaisi, Nawaf, I; Mohamed, Iehab Abdelilah; Barghouthi, Mohammad Hisham; Manzar, Mohammad Saood] Imam Abdulrahman Bin Faisal Univ, Coll Engn, Dept Environm Engn, Dammam, Saudi Arabia	13	10.4209/aaqr.2019.04.0187
71	Yagoub, M. M.	United Arab Emirates (UAE) talking map	GIS; Voice maps; Smart services; UAE	There is a global market for intelligent maps in areas such as navigation, moving robots, and smart cities. This leads to the rise of new research domains in geography such as navigation ontology and an ontological hierarchy for spatial knowledge. Early navigation maps used only visual descriptions and symbols. Continued developments in hardware, software, data and progress in integration of voic…	[Yagoub, M. M.] UAE Univ, Dept Geog & Urban Planning, POB 15551, Al Ain, U Arab Emirates	0	10.1007/s10708-018-9896-x
72	Mercan, Huseyin; Ozcan, Orkan	Total Water Storage in Small Islands Using Multi-satellite Products: The case of Cyprus	Cyprus; GRACE; TRMM; MODIS; WGHM; GLDAS	The world's longest international undersea water pipeline has recently been laid from southern Turkey to Northern Cyprus to address the water scarcity problems in the Cyprus Island. When completed, the project will add 19.8 million gallons of water annually for drinking and irrigation. Moreover, it will spur further development in the Turkish area divided from Greek community for four decades. Un…	[Mercan, Huseyin] Istanbul Tech Univ, Civil Engn Fac, Geomat Engn Dept, TR-34469 Istanbul, Turkey; [Ozcan, Orkan] Istanbul Tech Univ, Eurasia Inst Earth Sci, TR-34469 Istanbul, Turkey	0	10.1007/s12524-018-0840-9
73	Abou-Shaara, Hossam F.; Eid, Khalid S. A.	Increasing the profitability of propolis production in honey bee colonies by utilizing remote sensing techniques to spot locations of trees as potential sources of resin		Propolis is produced by honey bees utilizing resins from different plants especially trees. Propolis is incorporated in many industries and has many medicinal uses, and is also considered among valuable products from honey bee colonies. Beekeepers can produce propolis from their colonies after the end of honey seasons. Locations containing high numbers of trees are very suitable for propolis prod…	[Abou-Shaara, Hossam F.; Eid, Khalid S. A.] Damanhour Univ, Dept Plant Protect, Fac Agr, Damanhur 22516, Egypt	1	10.1080/2150704X.2019.1633488
74	Joubi, Abdulrahman; Akimoto, Yutaro; Okajima, Keiichi	A Production and Delivery Model of Hydrogen from Solar Thermal Energy in the United Arab Emirates	concentrated solar power; photovoltaics; GIS; hydrogen supply chain; renewable energy; the Middle East region; United Arab Emirates	Hydrogen production from surplus solar electricity as energy storage for export purposes can push towards large-scale application of solar energy in the United Arab Emirates and the Middle East region; this region's properties of high solar irradiance and vast empty lands provide a good fit for solar technologies such as concentrated solar power and photovoltaics. However, a thorough comparison b…	[Joubi, Abdulrahman; Akimoto, Yutaro; Okajima, Keiichi] Univ Tsukuba, Grad Sch Sci & Technol, Tsukuba, Ibaraki 3058573, Japan	1	10.3390/en15114000
75	Barakat, Ahmed; Ouargaf, Zainabe; Khellouk, Rida; El Jazouli, Aafaf; Touhami, Fatima	Land Use/Land Cover Change and Environmental Impact Assessment in Beni-Mellal District (Morocco) Using Remote Sensing and GIS	LULCC; Environmental degradation; Remote sensing; GIS; FAHP	Urbanization sprawls at the expense of the surrounding land corresponding generally to agricultural land or natural areas. Therefore, evaluating land use and land cover change (LULCC) is important. In this study, LULCC and its environmental impact in Beni-Mellal town and the surrounding communes (Morocco) are investigated between 2002 and 2016 using remote sensing, geographical information system…	[Barakat, Ahmed; Ouargaf, Zainabe; Khellouk, Rida; El Jazouli, Aafaf] Sultan My Slimane Univ, Fac Sci & Tech, Georesources & Environm Lab, Beni Mellal, Morocco; [Touhami, Fatima] Sultan My Slimane Univ, Polydisciplinary Fac, Interdisciplinary Lab Res Sci & Technol, Beni Mellal, Morocco	31	10.1007/s41748-019-00088-y
76	Jassim, M. S.; Coskuner, G.; Zaid, M.; Malik, U.	Analysis of aerosol optical depth over Bahrain and Eastern Province of Saudi Arabia based on MERRA-2 model	Aerosol speciation; Air pollution; Arabian Peninsula; Meteorology; Middle East; Mineral dust; Satellite-derived data	Spatial and temporal variability of aerosol optical depth (AOD) together with aerosol-type specification were analyzed over Eastern Province of Kingdom of Saudi Arabia (KSA) and Bahrain from 2008 to 2019. To investigate study region with more details, the Eastern Province of Saudi Arabia and Bahrain was divided into three and four zones, respectively. This work utilized comprehensive satellite-ba…	[Jassim, M. S.; Coskuner, G.; Zaid, M.; Malik, U.] Univ Bahrain, Coll Engn, Dept Chem Engn, POB 32038, Isa Town, Bahrain	2	10.1007/s13762-020-02987-4
77	Shahid, Muhammad Zeeshaan; Chishtie, Farrukh; Bilal, Muhammad; Shahid, Imran	WRF-Chem Simulation for Modeling Seasonal Variations and Distributions of Aerosol Pollutants over the Middle East	particulate matter; aerosols; Middle East; anthropogenic emission; mega cities	Atmospheric aerosols and dust have become a challenge for urban air quality. The presented study quantified seasonal spatio-temporal variations of aerosols, tropospheric ozone, and dust over the Middle East (ME) for the year 2012 by using the HTAP emission inventory in the WRF-Chem model. Simulated gaseous pollutants, aerosols and dust were evaluated against satellite measurements and reanalysis …	[Shahid, Muhammad Zeeshaan] King Abdullah Univ Sci & Technol KAUST, Earth Sci & Engn ErSE, Thuwal 23955, Saudi Arabia; [Chishtie, Farrukh] Spatial Informat Grp LLC, 2529 Yolanda Ct, Pleasanton, CA 94566 USA; [Bilal, Muhammad] Nanjing Univ Informat Sci & Technol, Sch Marine Sci, Lab Environm Remote Sensing LERS, Nanjing 210044, Peoples R China; [Shahid, Imran] Qatar Univ, Environm Sci Ctr, POB 271…	4	10.3390/rs13112112
78	Ciritci, Dilara; Turk, Tarik	Analysis of coastal changes using remote sensing and geographical information systems in the Gulf of Izmit, Turkey	GIS; Coastline; Change detection; Digital shoreline analysis system	The shoreline is constantly under the influence of physical elements, such as geomorphological events, earthquakes, and tectonic movements. In recent years, it has been changing due to the intensive use of coasts and the impact of human factors on coastal areas. This study's aim was to analyze the coastal change in the Gulf of Izmit, Turkey, using satellite images from different dates. In this co…	[Ciritci, Dilara; Turk, Tarik] Sivas Cumhuriyet Univ, Fac Engn, Dept Geomat Engn, TR-58140 Sivas, Turkey	4	10.1007/s10661-020-08255-9
79	Ciritci, Dilara; Turk, Tarik	Automatic Detection of Shoreline Change by Geographical Information System (GIS) and Remote Sensing in the Goksu Delta, Turkey	DSAS; GIS; Remote sensing; Shoreline	The changes occurring in the coastal regions of the countries with coasts are a very important issue for many professional disciplines, especially management and planning. Although the studies conducted on the detection of shoreline changes, future predictions, planning and taking measure are the center of interest all over the world, studies conducted on the subject are inadequate. In this study…	[Ciritci, Dilara; Turk, Tarik] Cumhuriyet Univ, Dept Geomat Engn, Fac Engn, TR-58140 Sivas, Turkey	18	10.1007/s12524-019-00947-1
80	Mansour, Shawky; Chockalingam, Jeganathan	Diagnostically counting palm date trees in Al-Ahssa Governorate of Saudi Arabia: an integrated GIS and remote sensing processing of IKONOS imagery	Tree counting; Saudi Arabia; High spatial resolution; Al-Ahssa; Date palm trees	Sustainability of date palm trees based economy envisages regular monitoring of spatio-temporal variations of these trees over time. But, field based counting is a very old style of managing trees which is labour intensive, costly and time consuming while modern geo-spatial technologies provides a fast, cheaper and accurate mechanism. In this regard, the current study attempts to formulate a repe…	[Mansour, Shawky] Sultan Qaboos Univ, Dept Geog, Coll Arts & Social Sci, Muscat, Oman; [Mansour, Shawky] Alexandria Univ, Fac Arts, Dept Geog & GIS, Alexandria, Egypt; [Chockalingam, Jeganathan] Birla Inst Technol BIT, Dept Remote Sensing, Ranchi 835215, Bihar, India	1	10.1007/s41324-020-00318-w
81	Lezzaik, Khalil; Milewski, Adam	A quantitative assessment of groundwater resources in the Middle East and North Africa region	Geographic information system; Groundwater statistics; Middle East and North Africa; Regional analysis; Remote sensing	The Middle East and North Africa (MENA) region is the world's most water-stressed region, with its countries constituting 12 of the 15 most water-stressed countries globally. Because of data paucity, comprehensive regional-scale assessments of groundwater resources in the MENA region have been lacking. The presented study addresses this issue by using a distributed ArcGIS model, parametrized with…	[Lezzaik, Khalil; Milewski, Adam] Univ Georgia, Dept Geol, Water Resources & Remote Sensing Grp WRRS, 210 Field St,306 Geog Geol Bldg, Athens, GA 30602 USA	30	10.1007/s10040-017-1646-5
82	Alarifi, Saad S. S.; Abdelkareem, Mohamed; Abdalla, Fathy; Abdelsadek, Ismail S. S.; Gahlan, Hisham; Al-Saleh, Ahmad. M.; Alotaibi, Mislat	Fusion of Multispectral Remote-Sensing Data through GIS-Based Overlay Method for Revealing Potential Areas of Hydrothermal Mineral Resources	mineral exploration; ASTER; OLI; Sentinel-2; GIS; Khnaiguiyah; Saudi Arabia	Revealing prospective locations of hydrothermal alteration zones (HAZs) is an important technique for mineral prospecting. In this study, we used multiple criteria inferred from Landsat-8 OLI, Sentinel-2, and ASTER data using a GIS-based weighted overlay multi-criteria decision analysis approach to build a model for the delineating of hydrothermal mineral deposits in the Khnaiguiyah district, Sau…	[Alarifi, Saad S. S.; Gahlan, Hisham; Al-Saleh, Ahmad. M.] King Saud Univ, Coll Sci, Dept Geol & Geophys, POB 2455, Riyadh 11451, Saudi Arabia; [Abdelkareem, Mohamed; Abdalla, Fathy; Abdelsadek, Ismail S. S.] South Valley Univ, Geol Dept, Qena 83523, Egypt; [Alotaibi, Mislat] Univ Arkansas, Dept Geosci, Fayetteville, AR 72704 USA	0	10.3390/min12121577
83	Elhebiry, Mohamed S.; Sultan, Mohamed; Abu El-Leil, Ibrahim; Kehew, Alan E.; Bekiet, Mahmoud H.; Shahid, Islam Abdel; Soliman, Nehal M. A.; Abotalib, Abotalib Z.; Emil, Mustafa	Paleozoic glaciation in NE Africa: field and remote sensing-based evidence from the South Eastern Desert of Egypt	Late Ordovician; Hirnantian; megalineations; megagrooves; Paleozoic glaciation; North Gondwana; South Eastern Desert; diamictite	Exhumed Paleozoic glacial deposits and landforms of the North Gondwana are reported here for the first time from the South Eastern Desert (SED) of Egypt. Using field observations and remote sensing datasets (Advanced Land Observing Satellite [ALOS], Phased Array L-band Synthetic Aperture Radar [PALSAR] radar, multispectral Landsat TM datasets, and digital elevation models [DEMs]), we mapped the d…	[Elhebiry, Mohamed S.; Abu El-Leil, Ibrahim; Bekiet, Mahmoud H.] Al Azhar Univ, Geol Dept, Cairo, Egypt; [Elhebiry, Mohamed S.; Sultan, Mohamed; Kehew, Alan E.; Abotalib, Abotalib Z.; Emil, Mustafa] Western Michigan Univ, Dept Geol & Environm Sci, Kalamazoo, MI 49008 USA; [Shahid, Islam Abdel] Egyptian Mineral Resources Author, Dept Reg Geol, Cairo, Egypt; [Soliman, Nehal M. A.; Abotalib, Abotali…	5	10.1080/00206814.2019.1636416
84	Avisse, Nicolas; Tilmant, Amaury; Rosenberg, David; Talozi, Samer	Quantitative Assessment of Contested Water Uses and Management in the Conflict-Torn Yarmouk River Basin		The Yarmouk River basin is shared between Syria, Jordan, and Israel. Since the 1960s, Yarmouk River flows have declined more than 85% despite the signature of bilateral agreements. Syria and Jordan blame each other for the decline and have both developed their own explanatory narratives: Jordan considers that Syria violated their 1987 agreement by building more dams than what was agreed on, while…	[Avisse, Nicolas; Tilmant, Amaury] Univ Laval, Dept Civil Engn & Water Engn, 1045 Ave Med, Quebec City, PQ G1V 0A6, Canada; [Rosenberg, David] Utah State Univ, Dept Civil & Environm Engn, 4110 Old Main Hill, Logan, UT 84322 USA; [Talozi, Samer] Jordan Univ Sci & Technol, Dept Civil Engn, Irbid 22110, Jordan	6	10.1061/(ASCE)WR.1943-5452.0001240
85	Al-Khalaf, Areej A.	Modeling the potential distribution of the predator of honey bees, Palarus latifrons, in the Arabian deserts using Maxent and GIS	Climate; Distribution; Beekeeping; Pests; Honey bees	Objectives: The species Palarus latifrons (bee pirates) has been recorded in Saudi Arabia as an invasive species. This pest can destroy honey bee colonies under certain conditions. The origin of this species in Africa and it has a good ability to adapt to desert conditions. Studies on this species are very few but its current distribution in the Arabian deserts is mainly in the Arabian Gulf count…	[Al-Khalaf, Areej A.] Princess Nourah Bint Abdulrahman Univ, Coll Sci, Dept Biol, Riyadh, Saudi Arabia	0	10.1016/j.sjbs.2021.06.012
86	Belhaj, Omar S.; Mubako, Stanley T.	Land Use Land Cover Change and Urban Growth in Khoms District, Libya, 1976-2015	Environmental Impacts; GIS; Image Classification; Land Cover; Land Use; Libya; Remote Sensing; Urbanization	Rapid and unplanned urbanization presents a formidable challenge to sustainable urban growth in most developing countries. This study applies Geographic Information System (GIS) and remote sensing tools to quantify land use and land cover change in the coastal, economically important district of Khoms, Libya. The study revealed a 16% per year long-term historic urban growth rate, leading to an ur…	[Belhaj, Omar S.] Univ Texas El Paso, Environm Sci & Engn, El Paso, TX 79968 USA; [Mubako, Stanley T.] Univ Texas El Paso, El Paso, TX 79968 USA	2	10.4018/IJAGR.2020040103
87	Sarkissian, Rita Der; Zaninetti, Jean-Marc; Abdallah, Chadi	The use of geospatial information as support for Disaster Risk Reduction; contextualization to Baalbek-Hermel Governorate/Lebanon	Disaster; Disaster Risk Reduction (DRR); Natural hazards; Geographic Information System (GIS); Remote sensing; Developing countries; Geography of risk	Given that natural hazards, vulnerabilities, and the resulting disasters are spatial phenomena; the application of geographical information systems (GIS) has proven to be a convenient and reliable tool for the Disaster Risk Reduction (DRR) process. Nevertheless, effective use of these technologies is context-specific and requires research and development, especially in developing countries like L…	[Sarkissian, Rita Der; Abdallah, Chadi] Natl Council Sci Res, Remote Sensing Ctr, Beirut, Lebanon; [Sarkissian, Rita Der; Zaninetti, Jean-Marc] Univ Orleans, Lab Econ Orleans, Orleans, France	11	10.1016/j.apgeog.2019.102075
88	Aragon, Bruno; Houborg, Rasmus; Tu, Kevin; Fisher, Joshua B.; McCabe, Matthew	CubeSats Enable High Spatiotemporal Retrievals of Crop-Water Use for Precision Agriculture	CubeSats; evapotranspiration; PT-JPL; remote sensing; Saudi Arabia; high-resolution; precision agriculture	Remote sensing based estimation of evapotranspiration (ET) provides a direct accounting of the crop water use. However, the use of satellite data has generally required that a compromise between spatial and temporal resolution is made, i.e., one could obtain low spatial resolution data regularly, or high spatial resolution occasionally. As a consequence, this spatiotemporal trade-off has tended t…	[Aragon, Bruno; McCabe, Matthew] King Abdullah Univ Sci Technol, Water Desalinat & Reuse Ctr, Thuwal 23955, Saudi Arabia; [Houborg, Rasmus] South Dakota State Univ, Geospatial Sci Ctr Excellence, Brookings, SD 57007 USA; [Houborg, Rasmus] South Dakota State Univ, Dept Geog, Brookings, SD 57007 USA; [Tu, Kevin] Corteva Agrisci, Agr Div DowDuPont, 8325 NW 62nd Ave,POB 7062, Johnston, IA 50131 USA; …	49	10.3390/rs10121867
89	Akhtar, Javed; Sana, Ahmed; Tauseef, Syed Mohammed; Chellaiah, Gajendran; Kaliyaperumal, Parmeswari; Sarkar, Humayun; Ayyamperumal, Ramamoorthy	Evaluating the groundwater potential of Wadi Al-Jizi, Sultanate of Oman, by integrating remote sensing and GIS techniques	Groundwater potential; Land use; Geology; Remote sensing; GIS; Al-Batinah	Groundwater resources are highly stressed due to their overuse, especially in the arid region. This study is aimed at discovering potential groundwater resource zones using currently available data and state-of-the-art methods. This will lead to effective management of scarcely available and rapidly depleting groundwater resources in the Wadi Al-Jizi catchment, located in the Al-Batinah region. D…	[Akhtar, Javed; Tauseef, Syed Mohammed] Univ Petr & Energy Studies, Sch Engn, Dehra Dun, Uttarakhand, India; [Akhtar, Javed; Kaliyaperumal, Parmeswari; Sarkar, Humayun] Univ Technol & Appl Sci, Engn Dept, Civil & Architectural Engn Sect, Muscat, Oman; [Sana, Ahmed] Sultan Qaboos Univ, Dept Civil & Architectural Engn, Muscat, Oman; [Chellaiah, Gajendran] Karunya Inst Technol & Sci, Dept Civil Engn…	3	10.1007/s11356-021-17848-x
90	Aboulola, Omar; Alharbi, Basma; Eshmawi, Ala; Khayyat, Mashael; Aljojo, Nahla; Alshutayri, Areej	A Novel Algorithm to Enrich Geographical Information Systems with Hybrid Data for Better Informed Decisions	GIS; Social economic class; Point of interests (POI); Road-based analysis; Saudi Arabia	Land use and census data are of a significant value to urban planners, decision-makers, and investors. Important decisions are made based upon historical data, i.e, inductive reasoning. Such data become increasingly valuable at a fine-grain level to decision-makers in businesses where audience segmentation is needed. In rapidly developing countries, land use and census data are widely available a…	[Aboulola, Omar; Khayyat, Mashael; Aljojo, Nahla] Univ Jeddah, Coll Comp Sci & Engn, Dept Informat Syst & Technol, Jeddah, Saudi Arabia; [Alharbi, Basma; Alshutayri, Areej] Univ Jeddah, Coll Comp Sci & Engn, Dept Comp Sci & Artificial Intelligence, Jeddah, Saudi Arabia; [Eshmawi, Ala] Univ Jeddah, Coll Comp Sci & Engn, Dept Cybersecur, Jeddah, Saudi Arabia	0	10.1007/s13369-021-05802-5
91	Fradley, Michael; Gyngell, Sarah	Landscapes of Mobility and Movement in North-West Arabia: A Remote Sensing Study of the Neom Impact Zone	remote sensing; GIS; landscape archaeology; Neom; mobility; Saudi Arabia	The historic environment of north-west Saudi Arabia is likely to be severely impacted by the construction of the Neom mega-city complex and the development of the city's hinterland. This region, located east of the Gulf of Aqaba, has only been subject to limited archaeological survey in the past, limiting any assessment of this negative impact. This paper presents data collected through a remote …	[Fradley, Michael] Univ Oxford, Sch Archaeol, Oxford OX1 3TG, England; [Gyngell, Sarah] La Trobe Univ, Dept Archaeol & Hist, Melbourne, Vic 3086, Australia	1	10.3390/land11111941
92	Elmahdy, Samy, I; Ali, Tarig A.; Mohamed, Mohamed M.; Howari, Fares M.; Abouleish, Mohamed; Simonet, Daniel	Spatiotemporal Mapping and Monitoring of Mangrove Forests Changes From 1990 to 2019 in the Northern Emirates, UAE Using Random Forest, Kernel Logistic Regression and Naive Bayes Tree Models	NUAE; mangrove; FMNF; remote sensing; change detection; Landsat	Mangrove forests are acting as a green lung for the coastal cities of the United Arab Emirates, providing a habitat for wildlife, storing blue carbon in sediment and protecting shoreline. Thus, the first step toward conservation and a better understanding of the ecological setting of mangroves is mapping and monitoring mangrove extent over multiple spatial scales. This study aims to develop a nov…	[Elmahdy, Samy, I; Ali, Tarig A.] Amer Univ Sharjah, Coll Engn, GIS, Sharjah, U Arab Emirates; [Elmahdy, Samy, I; Ali, Tarig A.] Amer Univ Sharjah, Coll Engn, Mapping Lab, Sharjah, U Arab Emirates; [Ali, Tarig A.] Amer Univ Sharjah, Coll Engn, Sharjah, U Arab Emirates; [Mohamed, Mohamed M.] United Arab Emirates Univ, Coll Engn, Dept Civil Engn, Al Ain, U Arab Emirates; [Mohamed, Mohamed M.] Unite…	13	10.3389/fenvs.2020.00102
93	Sawada, Yohei; Koike, Toshio; Ikoma, Eiji; Kitsuregawa, Masaru	Monitoring and Predicting Agricultural Droughts for a Water-Limited Subcontinental Region by Integrating a Land Surface Model and Microwave Remote Sensing	Drought; land data assimilation; passive microwave remote sensing	Agricultural drought monitoring and prediction technology are urgently needed. We applied an ecohydrological land data assimilation system (LDAS), which can simulate soil moisture and leaf area index (LAI) by data assimilation of microwave brightness temperature into a land surface model (LSM), to monitor and predict agricultural droughts in North Africa. We successfully monitor nationwide crop f…	[Sawada, Yohei] Univ Tokyo, Inst Engn Innovat, Tokyo 1130032, Japan; [Sawada, Yohei] Japan Meteorol Agcy, Meteorol Res Inst, Tsukuba, Ibaraki 3050052, Japan; [Koike, Toshio] Int Ctr Water Hazard & Risk Management ICHARM, Tsukuba, Ibaraki 3002621, Japan; [Ikoma, Eiji; Kitsuregawa, Masaru] Univ Tokyo, Inst Ind Sci, Tokyo 1538505, Japan	9	10.1109/TGRS.2019.2927342
94	Grati, Fabio; Azzurro, Ernesto; Scanu, Martina; Tassetti, Anna Nora; Bolognini, Luca; Guicciardi, Stefano; Vitale, Sergio; Scannella, Danilo; Carbonara, Pierluigi; Dragicevic, Branko; Ikica, Zdravko; Palluqi, Arian; Marceta, Bojan; Ghmati, Hisham; Turki, Akram; Cherif, Mourad; Bdioui, Marouene; Jarboui, Othman; Benhadjhamida, Nader; Mifsud, Jurgen; Milone, Nicoletta; Ceriola, Luca; Arneri, Enrico	Mapping small-scale fisheries through a coordinated participatory strategy	data-poor fisheries; fishing effort; geographical information systems; local ecological knowledge; marine spatial planning; participatory mapping	The knowledge of small-scale fisheries (SSFs) is important to develop management policies and mitigate the competition for marine resources. However, spatially explicit information is often unavailable at the regional and subregional scale. We designed and tested a novel participatory approach to map the SSF fishing effort using the Mediterranean sea as a case study. We applied the approach in ei…	[Grati, Fabio; Azzurro, Ernesto; Scanu, Martina; Tassetti, Anna Nora; Bolognini, Luca; Guicciardi, Stefano; Arneri, Enrico] Natl Res Council CNR, Inst Biol Resources & Marine Biotechnol IRBIM, Ancona, Italy; [Azzurro, Ernesto] SZN, Stn Zool Napoli, Naples, Italy; [Scanu, Martina] Univ Bologna, Dept Biol Geol & Environm Sci BiGeA, Alma Mater Studiorum, Bologna, Italy; [Vitale, Sergio; Scannella, D…	3	10.1111/faf.12644
95	Moustafa, Sayed S. R.; Abdalzaher, Mohamed S. S.; Abdelhafiez, H. E.	Seismo-Lineaments in Egypt: Analysis and Implications for Active Tectonic Structures and Earthquake Magnitudes	maximum magnitude estimation; seismic hazard; risk mitigation; Egypt; active tectonic structures; remote sensing; (M-max)	Quiescent faults may be capable of creating catastrophic earthquakes in locations with moderate and/or low seismic activity, such as Egypt. This study combines structural, remote sensing (RS), geophysical, and seismic activity data to examine and analyze the relationship between tectonic structures and seismotectonic activity in Egypt. In a new seismo-lineaments map of Egypt, tectonic lineaments …	[Moustafa, Sayed S. R.; Abdalzaher, Mohamed S. S.; Abdelhafiez, H. E.] Natl Res Inst Astron & Geophys, Egyptian Natl Seism Network ENSN, Dept Seismol, Cairo 11421, Egypt	1	10.3390/rs14236151
96	Al-Mahfadi, Afrah Saad; Dakki, Mohamed; Alaoui, Altaf; Ben Hichou, Badr	Classification of Estuarine Wetlands in Yemen Using Local and Catchment Descriptors	Wetland classification; Remote sensing data; GIS; Generic methodology mapping; Yemen	A high number of wetlands were irreversibly lost in arid regions, mainly because their conservation raises the great conflict between maintaining wetland hydrology and satisfying water needs of the human population. In Yemen, as an arid developing country, the poor knowledge on wetlands is another challenge that faces their conservation. The present paper contributes to this knowledge by providin…	[Al-Mahfadi, Afrah Saad; Dakki, Mohamed; Alaoui, Altaf; Ben Hichou, Badr] Mohammed V Univ Rabat, Inst Sci, Geobiodivers & Nat Patrimony Lab GEOBIO, 703 Sci Inst, Ibn Batota St, Rabat, Morocco	1	10.1007/s12237-020-00887-x
97	Namdari, Soodabeh; Karimi, Neamat; Sorooshian, Armin; Mohammadi, GholamHasan; Sehatkashani, Saviz	Impacts of climate and synoptic fluctuations on dust storm activity over the Middle East	Middle East; Dust storm; MODIS; TRMM; Precipitation; Temperature; Synoptic analysis	Dust events in the Middle East are becoming more frequent and intense in recent years with impacts on air quality, climate, and public health. In this study, the relationship between dust, as determined from Aerosol Optical Depth (AOD) and meteorological parameters (precipitation, temperature, pressure and wind field) are examined using monthly data from 2000 to 2015 for desert areas in two areas…	[Namdari, Soodabeh] Univ Tabriz, Dept Climatol, Tabriz, Iran; [Karimi, Neamat] WRI, Dept Water Resources Res, Tehran, Iran; [Sorooshian, Armin] Univ Arizona, Dept Chem & Environm Engn, Tucson, AZ USA; [Sorooshian, Armin] Univ Arizona, Dept Hydrol & Atmospher Sci, Tucson, AZ USA; [Mohammadi, GholamHasan] IRIMO, POB 13185-461, Tehran, Iran; [Sehatkashani, Saviz] Atmospher Sci & Meteorol Res Ctr ASM…	66	10.1016/j.atmosenv.2017.11.016
98	Nouri, Hamid; Faramarzi, Mohammad; Sadeghi, Seyyed Hadi; Nasseri, Samaneh	Effects of regional vegetation cover degradation and climate change on dusty weather types	Vegetation cover; Climate change; Dust; Weather type; Iran	Dust sources of west and south west of Iran are mainly from interior lands and neighbouring countries such as Iraq, Syria, Saudi Arabia, and Kuwait which are influenced by climate fluctuations and land use/land cover (LULC) degradation. The aim of this research is to investigate the impacts of regional vegetation cover degradation (RVCD) and climate change on dusty weather types in Zagros Mountai…	[Nouri, Hamid] Malayer Univ, Res Inst Grape & Raisin, Fac Nat Resources Engn, Dept Range & Watershed Management, Malayer, Iran; [Faramarzi, Mohammad; Sadeghi, Seyyed Hadi] Malayer Univ, Res Inst Grape & Raisin, Malayer, Iran; [Nasseri, Samaneh] Univ Tehran, Fac Nat Resources Engn, Dept Watershed Management, Tehran, Iran	7	10.1007/s12665-019-8763-5
99	Cruz-Folch, Irene; Valenzuela-Lamas, Silvia	From western cowboys to eastern shepherds: Funerary practices and animal husbandry in Mauretania and Numidia from the first millennium BC to circa 500AD	Zooarchaeology; GIS; Maghreb; Protohistory; Phoenician-Punic; Roman times	The use of Geographic Information Systems (GIS) in zooarchaeological studies and the comparison with other data sources are still very limited. This paper presents the results of a combined study of funerary monuments and animal husbandry practices dated from the first millennium BC to circa 500 AD in the present-day territories of Morocco, Algeria and Tunisia. The main objectives were to determi…	[Cruz-Folch, Irene] Univ Barcelona, GRACPE, C Montalegre 6-8, Barcelona 08001, Spain; [Valenzuela-Lamas, Silvia] CSIC, Inst Mila & Fontanals, C Egipciaques 15, Barcelona 08001, Spain	3	10.1016/j.quaint.2017.10.023
100	Campana, Stefano; Sordini, Matteo; Berlioz, Stefania; Vidale, Massimo; Al-Lyla, Rowaed; Al-Araj, Ammar Abbo; Bianchi, Alessandro	Remote sensing and ground survey of archaeological damage and destruction at Nineveh during the ISIS occupation	Iraq; Nineveh; Assyrian Empire; remote sensing; conservation assessment; looting; ISIS	Armed conflicts frequently result in the damage or destruction of archaeological heritage. The occupation by ISIS of parts of Iraq and Syria is no exception. Here, the authors present the results of work focused on Nineveh, as part of a wider research initiative to monitor damage inflicted by ISIS at archaeological sites in northern Iraq. Combining satellite imagery, low-level aerial photography …	[Campana, Stefano] Univ Siena, Dept Hist & Cultural Heritage, Siena, Italy; [Sordini, Matteo] Archeo Tech & Survey Srl, Siena, Italy; [Vidale, Massimo] Univ Padua, Dept Cultural Heritage Archaeol & Hist Art Cinema, Padua, Italy; [Al-Lyla, Rowaed; Al-Araj, Ammar Abbo] State Board Antiqu & Heritage, Mosul, Iraq; [Bianchi, Alessandro] Italian Minist Cultural Heritage & Act, Rome, Italy	3	10.15184/aqy.2022.14
101	Sultana, Rebeka; Nasrollahi, Nasrin	Evaluation of remote sensing precipitation estimates over Saudi Arabia	Saudi Arabia; Satellite precipitation; Validation	The goal of this study is to evaluate five global high-resolution satellite precipitation products (PERSIANN, PERISANN-CDR, TRMM-RT, TRMM-3B42, and CMORPH) in Saudi Arabia where only 29 rain gauges distributed in various parts of the country record daily rainfall. The satellite data are evaluated on a daily and monthly scale and at a 0.25 degrees x 0.25 degrees spatial resolution from January 200…	[Sultana, Rebeka] Calif State Univ Long Beach, Civil Engn & Construct Engn Management, 1250 Bellflower Blvd, Long Beach, CA 90840 USA; [Nasrollahi, Nasrin] Orange Cty Sanitat Dist, 10844 Ellis Ave, Fountain Valley, CA 92708 USA	15	10.1016/j.jaridenv.2017.11.002
102	Touhami, Issam; Aouinti, Hamdi; Khabthani, Mohamed A.; Bergaoui, Kaouther; Chirino, Esteban; Rzigui, Touhami; Bellot, Juan; Khaldi, Abdelhamid; Khouja, Mohamed L.; Mannai-Tayech, Beya	Monitoring land-cover changes in Mediterranean coastal dunes, northwest Tunisia, using remote sensing data	coastal dune systems; land-cover changes; Mediterranean ecosystem; remote sensing; Tunisia	Coastal dune landscapes are subject to morphological and ecological changes. In many parts of the world, coastal dunes are under severe pressure. The present study illustrates an integrated remote sensing and Geographical Information System (GIS) approach, i.e., geospatial techniques for assessing land-cover dynamics in Zouaraa coastal dunes, located in northwest Tunisia. As a main result, the an…	[Touhami, Issam; Aouinti, Hamdi; Rzigui, Touhami; Khaldi, Abdelhamid; Khouja, Mohamed L.] Univ Carthage, Natl Res Inst Rural Engn Water & Forestry, INRGREF, Lab Management & Valorizat Forest Resources, BP 10, Ariana 2080, Tunisia; [Khabthani, Mohamed A.; Mannai-Tayech, Beya] Univ Tunis El Manar, Fac Sci Tunis, Campus Univ, El Manar 2092, Tunisia; [Bergaoui, Kaouther] Natl Ctr Nucl Sci & Technol, …	0	10.15835/nbha50312794
103	Khan, Mohd Yawar Ali; ElKashouty, Mohamed; Subyani, Ali Mohammad; Tian, Fuqiang; Gusti, Waleed	GIS and RS intelligence in delineating the groundwater potential zones in Arid Regions: a case study of southern Aseer, southwestern Saudi Arabia	GWPZs; GIS; RS; Aquifers; TDS; Aseer; Saudi Arabia	Proterozoic basement aquifers are the primary source of water supply for the local populations in the Aseer (also spelled Asir or Assir) province located in the southwest of Saudi Arabia (SA) since high evaporation rates and low rainfall are experienced in the region. Groundwater assets are receiving a lot of attention as a result of the growing need for water due to increased urbanization, popul…	[Khan, Mohd Yawar Ali; ElKashouty, Mohamed; Subyani, Ali Mohammad; Gusti, Waleed] King Abdulaziz Univ, Fac Earth Sci, Dept Hydrogeol, Jeddah 21589, Saudi Arabia; [Tian, Fuqiang] Tsinghua Univ, Sch Civil Engn, Dept Hydraul Engn, Beijing 100084, Peoples R China; [Gusti, Waleed] King Abdulaziz Univ, Fac Meteorol Environm & Arid Land Agr, Dept Environm Sci, Jeddah 21589, Saudi Arabia	9	10.1007/s13201-021-01535-w
104	Smida, Habib; Dassi, Lassaad; Boukhachem, Khaoula; Masrouhi, Amara	Satellite remote sensing and GIS-based multi-criteria analysis for the assessment of groundwater potentiality in fractured limestone aquifer: Case study of Maknassy Basin, central Tunisia	Groundwater potentiality; Maknassy basin; GIS; Multi-criteria analysis; Remote sensing; Fractured aquifer	Satellite remote sensing and GIS-based multi-criteria analysis are used to assess groundwater availability and potentiality of the fractured limestone aquifer of the Maknassy Basin, Central Tunisia. The integration of the multi-source data used (satellite images from Landsat 7 Enhanced Thematic Mapper Plus (ETM +), Digital Elevation Model (DEM), hydrology and borehole data) based on the multi-cri…	[Smida, Habib] King Abdulaziz Univ, Fac Earth Sci, Dept Hydrogeol, Jeddah, Saudi Arabia; [Smida, Habib] Univ Sfax, Fac Sci Sfax, Dept Earth Sci, Res Lab Water, Sfax, Tunisia; [Dassi, Lassaad] Univ Sfax, Higher Inst Biotechnol Sfax, Dept Biotechnol & Hlth, Sfax, Tunisia; [Boukhachem, Khaoula] Univ Gabes, Higher Inst Sci & Tech Waters Gabes, Dept Water Resources, Gabes, Tunisia; [Masrouhi, Amara] K…	0	10.1016/j.jafrearsci.2022.104643
105	Zeidan, Zaki M.; Beshr, Ashraf A. A.; Soliman, Sanaa S.	Monitoring the change in land surface temperature and urban areas using Satellite images. Case study Kafr EI-Sheikh City - Egypt	Urban area; ERDAS Imagine software; satellite image; LST; ArcGIS 10.3; Forecasting	In recent years, the rate of urban growth has increased rapidly especially in Egypt, due to the increase in population growth. The Egyptian government has set up new cities and established large factories, roads and bridges in new places to solve this trouble. This paper investigates the change monitoring of land surface temperature, urban and agricultural area in Egypt especially Kafr EL-Sheikh …	[Zeidan, Zaki M.; Beshr, Ashraf A. A.] Mansoura Univ, Fac Engn, Publ Works Dept, Mansoura 35516, Egypt; [Beshr, Ashraf A. A.; Soliman, Sanaa S.] Higher Inst Engn & Technol, Dept Civil Engn, Kafr El Sheikh Kafr Shie 33511, Egypt	1	10.24425/gac.2019.128465
106	Yagoub, Mohamed M.; Tesfaldet, Yacob T.; Elmubarak, Marwan G.; Al Hosani, Naeema	Extraction of Urban Quality of Life Indicators Using Remote Sensing and Machine Learning: The Case of Al Ain City, United Arab Emirates (UAE)	urban quality of life; greenness; remote sensing; machine learning; principal component analysis (PCA)	Urban quality of life (UQoL) study is very important for many applications such as services distribution, urban planning, and socioeconomic analysis. The objective of this study is to create an urban quality of life index map for Al Ain city in the United Arab Emirates (UAE). The research aligns with the United Nations Sustainable Development Goals number ten (reduce inequalities) and eleven (sus…	[Yagoub, Mohamed M.; Tesfaldet, Yacob T.; Elmubarak, Marwan G.; Al Hosani, Naeema] UAE Univ, Dept Geog & Urban Sustainabil, POB 15551, Al Ain, U Arab Emirates	1	10.3390/ijgi11090458
107	Aklibasinda, Meliha; Ok, Asli Ozdarici	Determination of the urbanization and changes in open-green spaces in Nevsehir city through remote sensing	Urban; Open-green space; Built-up area; Remote sensing; Geographical information systems	The physical texture of cities is comprised of built-up spaces, open-green spaces, and transportation arteries. Urbanization is a dynamic that compose of each of the factors above in a fair proportion to human beings and nature. On the other hand, due to the rapid increase in urban population, urbanization has become a concept that poses serious problems for cities in the last decades and this le…	[Aklibasinda, Meliha] Nevsehir Haci Bektas Veli Univ, Dept Landscape Architecture, Fac Engn & Architecture, TR-50300 Nevsehir, Turkey; [Ok, Asli Ozdarici] Ankara Haci Bayram Veli Univ, Dept Real Estate & Property Management, Coll Land Registry, Ankara, Turkey	4	10.1007/s10661-019-7953-7
108	Kale, Semih; Acarli, Deniz	Spatial and Temporal Change Monitoring in Water Surface Area of Atikhisar Reservoir (Canakkale, Turkey) by using Remote Sensing and Geographic Information System Techniques	Atikhisar; GIS; Monitoring; Remote Sensing; Surface Area	Spatial and temporal changes in surface area of Atikhisar Reservoir were monitored by using remote sensing and geographic information system techniques from 1975 to 2017. Satellite images were processed, analysed and manually digitized to reveal the changes in surface area of the reservoir. The results showed that total surface area of the reservoir was ranged between 1.72km(2) and 3.84km(2) duri…	[Kale, Semih] Canakkale Onsekiz Mart Univ, Fac Marine Sci & Technol, Canakkale, Turkey; [Acarli, Deniz] Canakkale Onsekiz Mart Univ, Gokceada Sch Appl Sci, Canakkale, Turkey	2	10.28955/alinterizbd.574361
109	Zaina, Federico	A Risk Assessment for Cultural Heritage in Southern Iraq: Framing Drivers, Threats and Actions Affecting Archaeological Sites	Cultural heritage; risk assessment; protection strategies; landscape archaeology; Southern Iraq; archaeological sites	This paper proposes a classification of the risks threatening archaeological sites in southern Iraq and suggests some possible remediation to better preserve them. This has been possible thanks to a research methodology that combines remote sensing and ground control on a sample of 558 sites documented by the Iraqi-Italian QADIS survey project. A three-tier typological framework has been created …	[Zaina, Federico] Univ Bologna, Dept Hist & Cultures, Bologna, Italy	12	10.1080/13505033.2019.1662653
110	Abboud, Iyad Ahmed; Nofal, Ramadan Abd Elhamid	Using remote sensing techniques to interpret geomorphological features along the east coast of the Red Sea, at Yanbu, Saudi Arabia	Geomorphology; Remote sensing; Coastal landforms; Mapping methods; Yanbu coast; Red Sea	Yanbu is the second largest port and population settlement on the Saudi Arabian Red Sea coast. With the increasing development of its nearby coast, the geomorphological characteristics of the region must be studied in detail in order to inform future developments of the region. This study examines the region's suitability for future development. A high-resolution map of the coastal area under stu…	[Abboud, Iyad Ahmed] Taibah Univ, Geol Biol Dept, Coll Sci, Yanbu Branch, POB 89, Yanbu 41911, Al Madinah Al M, Saudi Arabia; [Nofal, Ramadan Abd Elhamid] Mansoura Univ, Fac Arts, Dept Geog, Cairo, Egypt; [Nofal, Ramadan Abd Elhamid] Taibah Univ, Dept Geog, Coll Art & Human Sci, Yanbu Branch, POB 89, Yanbu 41911, Al Madina, Saudi Arabia	2	10.1007/s12517-020-05635-w
111	Meyburg, Bernd-Ulrich; Paillat, Patrick; Meyburg, Christiane; McGrady, Michael	Migration of a Peregrine Falcon Falco peregrinus calidus from Saudi Arabia to Cape Town as revealed by satellite telemetry	Africa; Falco peregrinus calidus; migration; Peregrine Falcon; satellite tracking	In boreal autumn 1995, we tracked a migrating adult Peregrine Falcon Falco peregrinus calidus from the border of Saudi Arabia and Yemen to near Cape Town, South Africa, a distance of 6 346 km. While on migration it covered 288 km d(-1), on average. During its migration in Africa it migrated faster than any other Peregrine tracked so far using satellite telemetry. Falco p. calidus is an uncommon, …	[Meyburg, Bernd-Ulrich] BirdLife Germany Nat & Biodivers Conservat Union, Berlin, Germany; [Paillat, Patrick] Int Fund Houbara Conservat, Abu Dhabi, U Arab Emirates; [Meyburg, Christiane] World Working Grp Birds Prey, Paris, France; [McGrady, Michael] Int Avian Res, Krems, Austria	2	10.2989/00306525.2017.1406411
112	Fathelrahman, Eihab M.; Hussein, Khalid A.; Paramban, Safwan; Green, Timothy R.; Vandenberg, Bruce C.	Chlorophyll-a concentration assessment using remotely sensed data over multiple years along the coasts of the United Arab Emirates	Chlorophyll-a concentration; Remote sensing; Water quality; Best-Fit regression model; Coastal areas	The United Arab Emirates (UAE) recently witnessed algal/phytoplankton blooms attributed to the high concentrations of Chlorophyll-a associated with the spread and accumulation of a wide range of organisms with toxic effects that influence ecological and fishing economic activities and water desalination along coastal areas. This research explores the UAE coasts as a case study for the framework p…	[Fathelrahman, Eihab M.; Paramban, Safwan] United Arab Emirates Univ, Dept Integrat Agr, Coll Food & Agr, POB 15511, Al Ain, U Arab Emirates; [Hussein, Khalid A.] United Arab Emirates Univ, Coll Humanities & Social Sci, Dept Geog & Urban Sustainabil, POB 15511, Al Ain, U Arab Emirates; [Green, Timothy R.] ARS, Water Management & Syst Res, USDA, 2150 Ctr Ave,Bldg D,Suite 200, Ft Collins, CO 80526 …	0	10.9755/ejfa.2020.v32.i5.2104
113	Laugier, Elise Jakoby; Abdullatif, Nawzad; Glatz, Claudia	Embedding the remote sensing monitoring of archaeological site damage at the local level: Results from the Archaeological practice and heritage protection in the Kurdistan Region of Iraq project		Today, the satellite-based monitoring of archaeological sites and site damage is a widespread practice, especially in conflict-affected regions. However, the vast majority of these remote sensing cultural heritage monitoring efforts have been led and conducted by remote researchers, and there remains an urgent need to embed this work within existing, in-country institutions at local and regional …	[Laugier, Elise Jakoby] Rutgers State Univ, Dept Anthropol, New Brunswick, NJ 08901 USA; [Laugier, Elise Jakoby] Rutgers State Univ, Ctr Human Evolutionary Studies CHES, New Brunswick, NJ 08901 USA; [Abdullatif, Nawzad] Garmian Dept Antiqu, Kalar, Kurdistan Regio, Iraq; [Glatz, Claudia] Univ Glasgow, Sch Humanities, Archaeol, Glasgow, Lanark, Scotland	2	10.1371/journal.pone.0269796
114	Al-Areeq, Ahmed M.; Abba, S., I; Yassin, Mohamed A.; Benaaf, Mohammed; Ghaleb, Mustafa; Aljundi, Isam H.	Computational Machine Learning Approach for Flood Susceptibility Assessment Integrated with Remote Sensing and GIS Techniques from Jeddah, Saudi Arabia	artificial intelligence; flood; Saudi Arabia; machine learning; GIS; remote sensing	Floods, one of the most common natural hazards globally, are challenging to anticipate and estimate accurately. This study aims to demonstrate the predictive ability of four ensemble algorithms for assessing flood risk. Bagging ensemble (BE), logistic model tree (LT), kernel support vector machine (k-SVM), and k-nearest neighbour (KNN) are the four algorithms used in this study for flood zoning i…	[Al-Areeq, Ahmed M.; Abba, S., I; Yassin, Mohamed A.; Benaaf, Mohammed; Aljundi, Isam H.] King Fahd Univ Petr & Minerals KFUPM, Interdisciplinary Res Ctr Membranes & Water Secur, Dhahran 31261, Saudi Arabia; [Ghaleb, Mustafa] King Fahd Univ Petr & Minerals KFUPM, Interdisciplinary Res Ctr Intelligent Secure Syst, Dhahran 31261, Saudi Arabia; [Aljundi, Isam H.] King Fahd Univ Petr & Minerals, Dept…	0	10.3390/rs14215515
115	Husain, Mohammad; Ali, Arshad	A Model to Identify Expeditiously During Storm to Enable Effective Responses to Flood Threat	Satellite Remote Sensing; Climate; Hazards; Weather; Flooding	In recent years, hazardous flash flooding has caused deaths and damage to infrastructure in Saudi Arabia. In this paper, our aim is to assess patterns and trends in climate means and extremes affecting flash flood hazards and water resources in Saudi Arabia for the purpose to improve risk assessment for forecast capacity. We would like to examine temperature, precipitation climatology and trend m…	[Husain, Mohammad; Ali, Arshad] Islamic Univ Madinah, Fac Comp & Informat Syst, Medina, Saudi Arabia	0	10.22937/IJCSNS.2021.21.5.4
116	Kokkalis, Panagiotis; Al Jassar, Hala K.; Solomos, Stavros; Raptis, Panagiotis-Ioannis; Al Hendi, Hamad; Amiridis, Vassilis; Papayannis, Alexandros; Al Sarraf, Hussain; Al Dimashki, Marwan	Long-Term Ground-Based Measurements of Aerosol Optical Depth over Kuwait City	aerosol optical depth; dust particles; soil moisture; Kuwait; sun-sky photometer; cluster analysis; trend analysis	We analyze ten years (2008-2017) of ground-based observations of the Aerosol Optical Depth (AOD) in the atmosphere of Kuwait City, in Middle East. The measurements were conducted with a CIMEL sun-sky photometer, at various wavelengths. The daily average AOD at 500 nm (AOD(500)) is 0.45, while the mean angstrom ngstrom coefficient (AE), calculated from the pair of wavelengths 440 and 870 nm, is 0.…	[Kokkalis, Panagiotis; Al Jassar, Hala K.; Al Hendi, Hamad] Kuwait Univ, Dept Phys, POB 5969, Safat 13060, Kuwait; [Solomos, Stavros; Amiridis, Vassilis] Natl Observ Athens, Inst Astron Astrophys Space Applicat & Remote Sen, Athens 15236, Greece; [Raptis, Panagiotis-Ioannis] Natl Observ Athens, Inst Environm Res & Sustainable Dev, Athens 15236, Greece; [Papayannis, Alexandros] Natl Tech Univ Athe…	18	10.3390/rs10111807
117	Elmoulat, Meryem; Ait Brahim, Lahcen	Landslides susceptibility mapping using GIS and weights of evidence model in Tetouan-Ras-Mazari area (Northern Morocco)	Mass movements susceptibility map; weight of evidence; GIS; remote sensing data; Tetouan-Ras-Mazari	The 590 km(2) of the Western Rif (North of Morocco) is well known for active mass movements due to the strong climatic and anthropogenic aggressions in this area, where lithology and topographic relief are likely the phenomena that cause slope instability problems. In this study, we have focused on mass movements that have been occurred in the last two decades, namely landslides, complex slides a…	[Elmoulat, Meryem; Ait Brahim, Lahcen] Mohamed V Univ, GLNH, Res Unit GeoRisk Geol Risks, Dept Earth Sci, Rabat, Morocco	13	10.1080/19475705.2018.1505666
118	Mukherji, Deborah; Youssef, Bassem; Dagher, Christelle; El-Hajj, Albert; Nasr, Rami; Geara, Fadi; Rabah, Danny; Al Dousari, Saad; Said, Rabih; Ashou, Raja; Wazzan, Wassim; Jabbour, Michel; Farha, George; Al Hamdani, Nibras; Al Hallaq, Yousuf; Ghazal, Hassan; Dbouk, Haifa; Bachir, Bassel; El Khoury, Clement; Sakr, Ghazi; Hussain, Hero K.; Sayyid, Khaled; Ibrahim, Khaled; Haidar, Mohammad; Zouain, …	Management of patients with high-risk and advanced prostate cancer in the Middle East: resource-stratified consensus recommendations	Prostate cancer; Middle East; Resource-stratified recommendations; Consensus; Multidisciplinary	Purpose Prostate cancer care in the Middle East is highly variable and access to specialist multidisciplinary management is limited. Academic tertiary referral centers offer cutting-edge diagnosis and treatment; however, in many parts of the region, patients are managed by non-specialists with limited resources. Due to many factors including lack of awareness and lack of prostate-specific antigen…	[Mukherji, Deborah; Dagher, Christelle; Temraz, Sally; Shamseddine, Ali] Amer Univ Beirut, Dept Internal Med, Div Hematol Oncol, Med Ctr, Beirut 11072020, Lebanon; [Youssef, Bassem; Geara, Fadi; Wazzan, Wassim; Bachir, Bassel; Bulbul, Muhammad] Amer Univ Beirut, Dept Radiat Oncol, Med Ctr, Beirut, Lebanon; [El-Hajj, Albert; Nasr, Rami; Khauli, Raja] Amer Univ Beirut, Dept Surg, Div Urol, Med Ctr,…	8	10.1007/s00345-019-02872-x
119	Oppel, Steffen; Arkumarev, Volen; Bakari, Samuel; Dobrev, Vladimir; Saravia-Mullin, Victoria; Adefolu, Solomon; Sozuer, Lale Aktay; Apeverga, Paul T.; Arslan, Safak; Barshep, Yahkat; Bino, Taulant; Bounas, Anastasios; cetin, Turan; Dayyoub, Maher; Dobrev, Dobromir; Duro, Klea; El-Moghrabi, Laith; ElSafoury, Hana; Endris, Ahmed; Asswad, Nabegh Ghazal; Harry, Junior H.; Ivande, Sam T.; Jbour, Shari…	Major threats to a migratory raptor vary geographically along the eastern Mediterranean flyway	Poisoning; Electrocution; Illegal killing; Wind turbine; Human-wildlife conflict; Belief-based use	The Convention of Migratory Species aims to protect migratory animals throughout their range, but efficient mitigation of threats facing migratory birds is hindered by poor knowledge about the magnitude and geographic range of threats. We used an expert assessment to prioritise which threats to mitigate in 13 countries along the eastern Mediterranean flyway to protect globally threatened Egyptian…	[Oppel, Steffen] Royal Soc Protect Birds, RSPB Ctr Conservat Sci, David Attenborough Bldg,Pembroke St, Cambridge CB2 3QZ, England; [Arkumarev, Volen; Dobrev, Vladimir; Dobrev, Dobromir; Popgeorgiev, Georgi; Yordanov, Emil; Nikolov, Stoyan C.] Bulgarian Soc Protect Birds, BirdLife Bulgaria, Yavorov Complex,Bl 71,Vh 4,POB 50, Sofia 1111, Bulgaria; [Bakari, Samuel] BirdLife Int, Africa Partnership S…	9	10.1016/j.biocon.2021.109277
120	Al Osaimi, Nada M.; Qoradi, Mofareh D.	Candidate site selection for nuclear power plants in Saudi Arabia using GIS	Nuclear power plants; Suitability analysis; GIS; Saudi Arabia	Many countries prefer to use renewable and clean energy sources over fossil fuels as fossil fuels are limited and have a negative impact on the environment. Although there are diverse, renewable, and clean sources of energy, such as solar, wind, and geothermal, the low and variable productivity of these resources impedes their application. Conversely, nuclear energy is a reliable, stable, and saf…	[Al Osaimi, Nada M.; Qoradi, Mofareh D.] King Saud Univ, Coll Arts, Dept Geog, Riyadh, Saudi Arabia	2	10.1007/s12517-020-06172-2
121	Al-Hajri, Salim Mohammed; Petropoulos, George P.; Markogianni, Vassiliki	Seasonal variation of key environmental parameters in the Sea of Oman using EO data and GIS	Earth observation; GIS; SST; Chlorophyll-a; SSH; MGET; Eddies	In this study, the seasonal and annual changes of key environmental parameters in the Sea of Oman during the period 2005-2012 have been investigated using a range of Earth Observation datasets. Furthermore, the seasonal and spatial variability of those changes to other environmental parameters for the same time period was also explored. Analysis of census of the anti-cyclonic and cyclonic eddies …	[Al-Hajri, Salim Mohammed] Aberystwyth Univ, Dept Geog & Earth Sci, Aberystwyth SY23 2DB, Dyfed, Wales; [Petropoulos, George P.] Harokopio Univ Athens, Dept Geog, El Venizelou 70, Athens 17671, Greece; [Petropoulos, George P.] Tech Univ Crete, Sch Mineral Resources Engn, Khania 73100, Crete, Greece; [Markogianni, Vassiliki] Hellen Ctr Marine Res, Inst Marine Biol Resources & Inland Waters, 46-7 K…	0	10.1007/s10668-020-00860-5
122	Clusa, Marcel; Carreras, Carlos; Cardona, Luis; Demetropoulos, Andreas; Margaritoulis, Dimitris; Rees, Alan F.; Hamza, Abdulmaula A.; Khalil, Mona; Levy, Yaniv; Turkozan, Oguz; Aguilar, Alex; Pascual, Marta	Philopatry in loggerhead turtles Caretta caretta: beyond the gender paradigm	Caretta caretta; Gene flow; Microsatellites; Philopatry; Nesting grounds; Population structure	Marine turtles have been traditionally considered model organisms to study sex-biased behaviour and dispersal. Although female philopatry has been identified in the loggerhead turtle, with adult females returning to specific locations to nest, studies on the philopatry and breeding migrations of males remain limited. In this study we analysed 152 hatchlings using 15 microsatellite markers. Each i…	[Clusa, Marcel; Carreras, Carlos; Pascual, Marta] Univ Barcelona, Dept Genet Microbiol & Stat IRBio, Av Diagonal 643, E-08028 Barcelona, Spain; [Clusa, Marcel; Cardona, Luis; Aguilar, Alex] Univ Barcelona, Dept Evolutionary Biol Ecol & Environm Sci IRBio, Av Diagonal 643, E-08028 Barcelona, Spain; [Demetropoulos, Andreas] Cyprus Wildlife Soc, POB 24281, CY-1703 Nicosia, Cyprus; [Margaritoulis, Di…	15	10.3354/meps12448
123	Lopez-Ruiz, Hector G.; Blazquez, Jorge; Vittorio, Michele	Assessing residential solar rooftop potential in Saudi Arabia using nighttime satellite images: A study for the city of Riyadh	Saudi Arabia; Remote sensing; Solar rooftop; Photovoltaic (PV)	The Saudi National Renewable Energy Program aims to substantially increase the share of renewable energy in the Kingdom's power generation mix. This study explores the extent to which solar rooftop deployment at the residential scale in Riyadh, could be cost-efficient and could accelerate decarbonization of in Saudi Arabia. This study found that the maximum aggregate solar power capacity in Riyad…	[Lopez-Ruiz, Hector G.] King Abdullah Petr Studies & Res Ctr, Riyadh, Saudi Arabia; [Blazquez, Jorge] Oxford Inst Energy Studies, Oxford, England; [Vittorio, Michele] Univ New Haven, West Haven, CT USA	17	10.1016/j.enpol.2020.111399
124	Boak, Emily	From conflict archaeology to archaeologies of conflict: remote survey in Kandahar, Afghanistan	Afghan archaeology; cultural heritage; remote sensing; military installations; war in Afghanistan; Kandahar; infrastructure	Emerging from research with the Afghan Heritage Mapping Partnership, a multi-year project using satellite imagery to detect, record and manage archaeological heritage, this paper examines the potentials of remote-sensing to not only monitor archaeological material culture, but also contemporary materiality as it is violently (re)assembled through conflict. Through systematic remote-sensed archaeo…	[Boak, Emily] Univ Calgary, Dept Anthropol & Archeol, Calgary, AB, Canada	2	10.1080/15740773.2019.1731144
125	Polikarpov, Igor; Al-Yamani, Faiza; Petrov, Peter; Saburova, Maria; Mihalkov, Vassil; Al-Enezi, Abdullah	Phytoplankton bloom detection during the COVID-19 lockdown with remote sensing data: Using Copernicus Sentinel-3 for north-western Arabian/Persian Gulf case study	Chlorophyll-a; COVID-19 lockdown; Harmful algal blooms; Kuwait; Remote sensing; Sentinel OLCI	To examine whether a country-wide COVID-19 lockdown affected phytoplankton development, variability of chlorophyll-a concentrations in the north-western Arabian/Persian Gulf (Kuwait Bay) was investigated using remote sensing instruments Sentinel OLCI between 2018 and 2020 and compared to available in situ collected data. Satellite-retrieved chlorophyll concentrations considerably increased in ins…	[Polikarpov, Igor; Al-Yamani, Faiza; Saburova, Maria] Kuwait Inst Sci Res, Ecosyst Based Management Marine Resources Program, POB 1638, Salmiya 22017, Kuwait; [Petrov, Peter; Al-Enezi, Abdullah] Kuwait Inst Sci Res, Crisis Decis Support Program, POB 24885, Safat 13109, Kuwait; [Mihalkov, Vassil] Natl Def Coll GS Rakovski, 82 Evlogi & Hristo Georgievi Blvd, Sofia 1504, Bulgaria	4	10.1016/j.marpolbul.2021.112734
126	Altuwaijri, Hamad Ahmed; Alotaibi, Mohammed Hazza; Almudlaj, Abdullah Mohammed; Almalki, Fawaz Mauid	Predicting urban growth of Arriyadh city, capital of the Kingdom of Saudi Arabia, using Markov cellular automata in TerrSet geospatial system	Arriyadh city; Prediction; Geographic information systems (GIS); Remote sensing; Urban growth	This study aimed to predict urban expansion in Arriyadh city over a 30-year period, from 2017 to 2047. In the target year 2047, several changes are expected to occur in Arriyadh. The predicting was based on the revealed outputs of urban change within the last 30-year period, from 1987 to 2017. This study aimed to clarify the extent of urban expansion that would occur in the future to compare the …	[Altuwaijri, Hamad Ahmed; Alotaibi, Mohammed Hazza; Almudlaj, Abdullah Mohammed; Almalki, Fawaz Mauid] King Saud Univ, Dept Geog, Arriyadh 11692, Saudi Arabia	12	10.1007/s12517-019-4261-z
127	Akyuz, Ezgi; Samavati, Mehrdad; Kaynak, Burcak	Spatial distribution of health risks associated with PM2.5 in Turkey and Iran using satellite and ground observations	PM2.5; Health risk; Mortality; Remote sensing	PM2.5 originated from anthropogenic or natural sources is still a problem worldwide and highly associated with health impacts. In this study, mortality associated with PM2.5 was calculated using satellite retrievals and ground observations for Turkey and Iran. A high-resolution population dataset along with high resolution satellitederived PM2.5 estimations (all compositions and dust and sea-salt…	[Akyuz, Ezgi] Istanbul Tech Univ, Eurasia Inst Earth Sci, Istanbul, Turkey; [Samavati, Mehrdad; Kaynak, Burcak] Istanbul Tech Univ, Sch Civil Engn, Dept Environm Engn, Istanbul, Turkey	6	10.1016/j.apr.2020.08.011
128	Tapete, Deodato; Cigna, Francesca	Appraisal of Opportunities and Perspectives for the Systematic Condition Assessment of Heritage Sites with Copernicus Sentinel-2 High-Resolution Multispectral Imagery	optical remote sensing; multispectral imagery; Sentinel-2; Google Earth; feature extraction; change detection; damage assessment; cultural heritage; Syria; Libya	Very high-resolution (VHR) optical satellite imagery (<= 5 m) is nowadays an established source of information to monitor cultural and archaeological heritage that is exposed to hazards and anthropogenic threats to their conservation, whereas few publications specifically investigate the role that regularly acquired images from high-resolution (HR) satellite sensors (5-30 m) may play in this appl…	[Tapete, Deodato; Cigna, Francesca] Italian Space Agcy ASI, Via Politecn Snc, I-00133 Rome, Italy	38	10.3390/rs10040561
129	Felix Nsanziyera, Ange; Lechgar, Hicham; Fal, Said; Maanan, Mehdi; Saddiqi, Omar; Oujaa, Aicha; Rhinane, Hassan	Remote-sensing data-based Archaeological Predictive Model (APM) for archaeological site mapping in desert area, South Morocco	Archaeology; Remote sensing data; GIS; Predictive model; Fuzzy logic; Saharan Morocco	Morocco hosts numerous archaeological sites, some of which are part of the UNESCO world heritage. Many of these sites, especially funerary mounds also called tumuli, or rock engravings and ceramics, are located in remote areas with limited access, particularly in the Saharan Morocco desert. We developed a remote sensing and GIS model to identify areas with high potential for hosting archaeologica…	[Felix Nsanziyera, Ange; Lechgar, Hicham; Fal, Said; Maanan, Mehdi; Saddiqi, Omar; Rhinane, Hassan] Univ Hassan II Casablanca, Geosci Lab, BP 5366 Maarif, Casablanca 20100, Morocco; [Oujaa, Aicha] INSAP, BP 6828, Rabat 10000, Morocco	6	10.1016/j.crte.2018.06.010
130	Arkian, F.; Nicholson, S. E.	Long-term variations of aerosol optical depth and aerosol radiative forcing over Iran based on satellite and AERONET data	Aerosol optical depth; MODIS; MISR; TOMS; AERONET; Iran	In this study, three different sensors of satellites including the Moderate Resolution Imaging Spectroradiometer (MODIS), Multi-angle Imaging SpectroRadiometer (MISR), and Total Ozone Mapping Spectrometer (TOMS) were used to study spatial and temporal variations of aerosols over ten populated cities in Iran. Also, the Hybrid Single-Particle Lagrangian Integrated Trajectory (HYSPLIT) model was use…	[Arkian, F.] Islamic Azad Univ, Tehran North Branch, Fac Marine Sci & Technol, Dept Meteorol, Tehran, Iran; [Nicholson, S. E.] Florida State Univ, Dept Earth Ocean & Atmospher Sci, Tallahassee, FL 32306 USA	13	10.1007/s10661-017-6336-1
131	Salar, Sarkawt Ghazi; Othman, Arsalan A.; Hasan, Syed E.	Identification of suitable sites for groundwater recharge in Awaspi watershed using GIS and remote sensing techniques	Awaspi watershed; Groundwater recharge; GIS; AHP; Remote sensing; Water harvesting; Kurdistan region	Groundwater is a valuable natural resource for drinking, domestic, livestock use, and irrigation, especially in arid and semi-arid regions like the Garmiyan belt in Kurdistan region. The Awaspi watershed is located 50 km east of Kirkuk city, south Kurdistan, Iraq; and covers an area of 2146 km(2). The paper presents result of a study aimed at: (1) mapping and preparing thematic layers of factors …	[Salar, Sarkawt Ghazi] Univ Garmian, Dept Geog, Coll Educ, Sulaymaniyah, Iraq; [Othman, Arsalan A.] Iraq Geol Survey, Sulaymaniyah Off, Sulaymaniyah, Iraq; [Hasan, Syed E.] Univ Missouri, Dept Geosci, Kansas City, MO 64110 USA	14	10.1007/s12665-018-7887-3
132	Almalki, Khalid A.; Al-Namazi, Ali A.	Impact of the industrial sector on surface temperatures in Jubail City, Saudi Arabia using remote sensing techniques	Jubail city; Industrial sector; Land surface temperature; Remote sensing; Environmental impact	Jubail is an industrial city that has registered the highest growth in Saudi Arabia in recent years, and it is important to understand the potential effects of this growth on both the environment and the City's residents. The collaboration between the industry and the academic researches and scientific technologies would contribute to achieve a proper management to reduce the potential industrial…	[Almalki, Khalid A.; Al-Namazi, Ali A.] King Abdulaziz City Sci & Technol, POB 6086, Riyadh 11442, Saudi Arabia	2	10.1007/s41324-019-00237-5
133	Popperl, Simone	GEOLOGIES OF ERASURE: SINKHOLES, SCIENCE, AND SETTLER COLONIALISM AT THE DEAD SEA	anthropology; environment; Israel; Palestine; Jordan; settler colonialism; sinkholes	Scientists who study Dead Sea sinkholes come to know them in particular ways (as generalized hydrogeoloic phenomena, symptoms of a regional environmental crisis, or divine retribution) and at particular scales (from the distant orbit of Earth observation satellites, from digitally altered aerial photographs, and occasionally from the inside). Using ethnographic data gathered between 2012 and 2015…	[Popperl, Simone] Univ Calif Irvine, Dept Anthropol, Irvine, CA 92697 USA	5	10.1017/S002074381800082X
134	Damoom, Mohammed M.; Hashim, Suhairul; Aljohani, Mohammed S.; Saleh, Muneer Aziz; Xoubi, Ned	Potential areas for nuclear power plants siting in Saudi Arabia: GIS-based multi-criteria decision making analysis	Nuclear power plant siting; Binary map; Spatial analysis; Saudi Arabia; Geographic information system (GIS); Sea level rise	This paper reports the identification modus operandi (in Phase-I) of prospective sites to situate nuclear power plants (NPPs) in Saudi Arabia. Currently, the nation has taken a strategic imitative to introduce nuclear power to resolve future energy crises. Potential areas for installing these NPPs were determined via geographical information system (GIS)-based multi-criteria decision making appro…	[Damoom, Mohammed M.; Hashim, Suhairul] Univ Teknol Malaysia, Phys Dept, Skudai 81310, Johor, Malaysia; [Damoom, Mohammed M.; Aljohani, Mohammed S.; Xoubi, Ned] King Abdulaziz Univ, Nucl Engn Dept, Jeddah 21589, Saudi Arabia; [Saleh, Muneer Aziz] Univ Teknol Malaysia, Fac Engn, Sch Chem & Energy Engn, Nucl Engn Programme, Utm Skudai 81310, Johor, Malaysia; [Hashim, Suhairul] Univ Teknol Malaysia,…	10	10.1016/j.pnucene.2018.09.018
135	Maaiah, Bashar; Al-Badarneh, Mohammad; Al-Shorman, Abdalla	Mapping potential nature based tourism in Jordan using AHP, GIS and remote sensing	NBT; cost; distance; AHP; GIS; remote sensing; Jordan	In the past few years, the demand for nature-based tourism (NBT) has increased significantly nationally and internationally. However, promoting NBT, especially at the local level, needs more attention. This study seeks to produce a map of NBT tourist attractions in Jordan that considers distance and cost. Analytical hierarchy process (AHP), geographic information system (GIS), and remote sensing …	[Maaiah, Bashar] Yarmouk Univ, Fac Tourism & Hotel Management, Dept Travel & Tourism, POB 566-21163, Irbid, Jordan; [Al-Badarneh, Mohammad] Yarmouk Univ, Fac Tourism & Hotel Management, Dept Tourism Management, Irbid, Jordan; [Al-Shorman, Abdalla] Yarmouk Univ, Fac Archaeol & Anthropol, Dept Anthropol, Irbid, Jordan	3	10.1080/14724049.2021.1968879
136	AlSanea, Dalal; Abdullah, Waleed	Sinkhole Susceptibility Hazard Mapping Using Analytical Hierarchy Process and GIS Tools for the State of Kuwait	Sinkhole hazard; Analytical hierarchy process (AHP); Geographical information system (GIS); Susceptibility	Sinkhole studies of Kuwait have involved the investigation and risk assessment of sinkholes in specific areas. This study assessed sinkhole hazard susceptibility within the geographic borders of Kuwait by integrating the analytical hierarchy process (AHP) with geographical information system (GIS) software. As a result, eight criteria were selected: water table depth within soil cover, fluctuatio…	[AlSanea, Dalal] Minist Publ Works, Kuwait 40002, Kuwait; [Abdullah, Waleed] Kuwait Univ, Coll Engn & Petr, Dept Civil Engn, POB 5969, Safat 13060, Kuwait	0	10.1061/AJRUA6.0001136
137	Abdullah, Gamil M. S.; Aal, Ahmed Abd El	Liquefaction hazards mapping along Red Sea coast, Jeddah city, Kingdom of Saudi Arabia	Liquefaction; Hazard maps; GIS; Factor of safety; Jeddah; Saudi Arabia	This study mainly aims to evaluate as well as to develop maps of the liquefaction potential for Jeddah City in the Kingdom of Saudi Arabia. Data is obtained and used from 214 boreholes associated with standard penetration tests (SPT). Through taking into account comparable seismic hazardous situations to amax = 0.1 g, the liquefaction potential index (LPI) is measured. In order to compile the liq…	[Abdullah, Gamil M. S.; Aal, Ahmed Abd El] Najran Univ, Coll Engn, Civil Engn Dept, Najran, Saudi Arabia; [Aal, Ahmed Abd El] Al Azhar Univ, Assiut Branch, Geol Dept, Fac Sci, Assiut, Egypt	2	10.1016/j.soildyn.2021.106682
138	Bozorg-Haddad, Omid; Zolghadr-Asli, Babak; Sarzaeim, Parisa; Aboutalebi, Mahyar; Chu, Xuefeng; Loaiciga, Hugo A.	Evaluation of water shortage crisis in the Middle East and possible remedies	GRACE satellite; Middle East region; water crisis; water equivalent anomaly; water resources management; water scarcity	Water resources in the Middle East region are becoming scarce, while millions of people already do not have access to adequate water for drinking and sanitary purposes. Water resources depletion has become a significant problem in this region that is likely to worsen. Current research by remote sensing analysis indicates a descending trend of water storage in the Middle East region, where agricul…	[Bozorg-Haddad, Omid; Zolghadr-Asli, Babak; Sarzaeim, Parisa; Aboutalebi, Mahyar] Univ Tehran, Coll Agr & Nat Resources, Fac Agr Engn & Technol, Dept Irrigat & Reclamat Engn, Karaj 3158777871, Iran; [Chu, Xuefeng] North Dakota State Univ, Dept Civil & Environm Engn, Dept 2470, Fargo, ND USA; [Loaiciga, Hugo A.] Univ Calif Santa Barbara, Dept Geog, Santa Barbara, CA 93016 USA	40	10.2166/aqua.2019.049
139	Zagonari, Fabio; Rossi, Claudio	A spatial decision support system for optimally locating treatment plants for safe wastewater reuse: an application to Saudi Arabia	Decision support system; Multi-criteria analysis; Geographical information system; Optimal location; Wastewater treatment plant; Safe reuse; Saudi Arabia; .NET framework; ODBC	In this study, we developed a non-linear optimizing spatial decision support system that combines multi-criteria analysis with a geographical information system. We consider dedicated tertiary treatment for agricultural, industrial, and landscape uses by evaluating economic, social, and environmental objectives based on distances from opportunity costs and water quality standards. Saudi Arabia is…	[Zagonari, Fabio; Rossi, Claudio] Univ Bologna, Dipartimento Sci Econ, Via Anghera 22, I-47900 Rimini, Italy	0	10.5004/dwt.2020.24979
140	AL-Shammari, Muthanna M. A.; AL-Shamma'a, Ayser M.; Al Maliki, Ali; Hussain, Hussain Musa; Yaseen, Zaher Mundher; Armanuos, Asaad M.	Integrated Water Harvesting and Aquifer Recharge Evaluation Methodology Based on Remote Sensing and Geographical Information System: Case Study in Iraq	Water harvesting; Aquifers recharge; GIS; Remote sensing; Iraq region	Water harvesting (WH) and aquifer recharge (AR) have been promoted in recent decades as solutions to the overexploitation of groundwater resources in many countries around the world. Remote sensing (RS) and geographic information system (GIS) technologies with multi-criteria decision analysis (MCDA) enable the analysis of many parameters to identify potential WH and AR sites and suitable zones fo…	[AL-Shammari, Muthanna M. A.] Gen Commiss Groundwater, Minist Water Resources, Baghdad, Iraq; [AL-Shammari, Muthanna M. A.] Iraqi Environm Upgrading & Dev Org NOG, Karbala, Iraq; [AL-Shamma'a, Ayser M.] Baghdad Univ, Coll Sci, Dept Geol, Baghdad, Iraq; [Al Maliki, Ali] Minist Sci & Technol, Environm & Water Directorate, POB 765, Baghdad, Iraq; [Hussain, Hussain Musa] Kufa Univ, Coll Sci, Dept Geo…	10	10.1007/s11053-021-09835-3
141	Bayazit, Yildirim; Koc, Cengiz	The impact of forest fires on floods and erosion: Marmaris, Turkey	Normalized burnt ratio (NBR); Geographical information systems (GIS); Remote sensing (RS); Soil conservation service-curve number (SCS-CN); Revised universal soil loss equation (RUSLE)	Forest fires caused by the extreme temperature brought on by climate change are the source of problems such as flood disasters and erosion in terms of changing the natural soil cover in that region. In this study, the effects of soil loss and flooding caused by the fire disaster that occurred in the Icmeler town of Marmaris, one of the world's most popular touristic cities, were investigated. The…	[Bayazit, Yildirim] Bilecik Seyh Edebali Univ, Fac Engn Bilecik, Dept Civil Engn, Bilecik, Turkey; [Koc, Cengiz] Mugla Sitki Kocman Univ, Fac Architecture, Dept City & Reg Planning, Mugla, Turkey	1	10.1007/s10668-022-02624-9
142	Abdelkareem, Mohamed; Gaber, Ahmed; Abdalla, Fathy; El-Din, Gamal Kamal	Use of optical and radar remote sensing satellites for identifying and monitoring active/inactive landforms in the driest desert in Saudi Arabia	Radar imaging; InSAR-CCD; Sand dunes dynamics; Paleohydrology	Observing Earth from the space is key for monitoring land-surface dynamics and probing near-surface geomorphic and geological features, including those obscured by sand sheets/dunes and human activity. The hyper-arid area of the Arabian Peninsula was selected for detecting and extracting obscure paleohydrological systems and modeling the spatio-temporal dynamics of sand dunes using synthetic aper…	[Abdelkareem, Mohamed; Abdalla, Fathy; El-Din, Gamal Kamal] South Valley Univ, Geol Dept, Qena 83523, Egypt; [Abdelkareem, Mohamed] South Valley Univ, Remote Sensing Lab, Qena 83523, Egypt; [Gaber, Ahmed] Port Said Univ, Geol Dept, Port Said 42522, Egypt; [Abdalla, Fathy] King Saud Univ, Sci Res, Riyadh 68953, Saudi Arabia; [El-Din, Gamal Kamal] Prince Sattam Bin Abdulaziz Univ, Coll Sci & Humani…	15	10.1016/j.geomorph.2020.107197
143	Zohar, Motti; Ben-Bassat, Yuval	Analyzing routes in Ottoman Greater Syria using historical GIS: The 1849 Saida map		Ottoman cartographic materials are important sources of information on 19th and early 20th-century Greater Syria. However, large portions of this corpus have yet to be examined. This study explores a rare mid-19th-century Ottoman map of the Province of Saida preserved in the Ottoman Archive in Istanbul. It lists travel times between villages, towns, and administrative centers in Greater Syria und…	[Zohar, Motti] Univ Haifa, Dept Geog & Environm Studies, Abba Khoushy Ave 199, IL-3498838 Haifa, Israel; [Ben-Bassat, Yuval] Univ Haifa, Dept Middle Eastern & Islamic Studies, Haifa, Israel	0	10.1111/tgis.12788
144	Abd El-sadek, Elsayed; Elbeih, Salwa; Negm, Abdelazim	Coastal and landuse changes of Burullus Lake, Egypt: A comparison using Landsat and Sentinel-2 satellite images	Lake Burullus, Egypt; Spatiotemporal Land Use/Land Cover LU/LC; Change detection and Monitoring; Remote sensing and GIS Spectral Indices	Monitoring water bodies such as lakes is expensive, but remote sensing made it cost-effective. The extensive anthropogenic activities negatively impact the water lakes everywhere. Moreover, the Egyptian coastal lakes are not an exception. This paper investigates changes in land use/land cover and detects coastal changes of Buullus Lake, ranked to be the second-largest Egyptian northern Mediterran…	[Abd El-sadek, Elsayed; Elbeih, Salwa] Natl Author Remote Sensing & Space Sci NARSS, Cairo, Egypt; [Abd El-sadek, Elsayed; Negm, Abdelazim] Zagazig Univ, Fac Engn, Zagazig, Egypt	1	10.1016/j.ejrs.2022.07.006
145	Aljenaid, Sabah; Abido, Mohammad; Redha, Ghadeer Khadeem; AlKhuzaei, Manaf; Marsan, Yvonne; Khamis, Abdel Qader; Naser, Humood; AlRumaidh, Mohammad; Alsabbagh, Maha	Assessing the spatiotemporal changes, associated carbon stock, and potential emissions of mangroves in Bahrain using GIS and remote sensing data	Mangroves; High-resolution images; Carbon stocks; Carbon sequestration; Anthropogenic pressure; Mitigation	The gray mangrove (Avicennia marina (Forssk) Vierh) constructs one of Bahrain's most critical ecosystem, severly deteriorating, which has been severely deteriorated by increasing anthropogenic pressures. This study aimed to assess the spatiotemporal changes in the mangrove habitat around Tubli Bay, Kingdom of Bahrain, over the last 50 years through achieving the following: (1) detect the progress…	[Aljenaid, Sabah; Redha, Ghadeer Khadeem] Arabian Gulf Univ, Coll Grad Studies, Dept Geoinformat, Manama 26671, Bahrain; [Abido, Mohammad] Arabian Gulf Univ, Coll Grad Studies, Dept Nat Resources & Environm, Manama 26671, Bahrain; [AlKhuzaei, Manaf] Univ Brighton, Dept Environm & Technol, Brighton, E Sussex, England; [Marsan, Yvonne] Univ North Carolina Wilmington, Dept Earth & Ocean Sci, Wilming…	2	10.1016/j.rsma.2022.102282
146	Mashagbah, A. F.; Ibrahim, M.; Al-Fugara, A.; Alzaben, H.	SPATIAL AND TEMPORAL MODELING OF THE URBAN GROWTH AND LAND COVER CHANGES USING REMOTE SENSING, SPATIAL INDEXES AND GIS TECHNIQUES IN IRBID CITY, JORDAN	changes city; past years; land use; spatial and temporal patterns; sprawl; Landsat; urban expansion; Shannon entropy	This study examined the temporal and spatial changes in the urban land cover of the northern region of Jordan from 2000 to 2020. Automated processing of satellite images was carried out and different statistical indicators were applied to analyze the data. The data facilitated the monitoring of urban sprawl and determination of trends based on the Geographic Information System (GIS) and remote se…	[Mashagbah, A. F.; Ibrahim, M.] Al Al Bayt Univ, Inst Earth & Environm Sci, Dept Geog Informat Syst & Remote Sensing, Mafraq, Jordan; [Al-Fugara, A.] Al Al Bayt Univ, Fac Engn, Dept Engn Survey, Mafraq, Jordan; [Alzaben, H.] Al Hussein Tech Univ, Fac Engn, Dept Mech Engn, Amman, Jordan	1	10.15666/aeer/2003_27692781
147	Alharbi, Raied; Hsu, Kuolin; Sorooshian, Soroosh	Bias adjustment of satellite-based precipitation estimation using artificial neural networks-cloud classification system over Saudi Arabia	Saudi Arabia; PERSIANN-CCS; Rain gauge; Remote sensing; Climate; Quantile mapping	Precipitation is a key input variable for hydrological and climate studies. Rain gauges can provide reliable precipitation measurements at a point of observations. However, the uncertainty of rain measurements increases when a rain gauge network is sparse. Satellite-based precipitation estimations SPEs appear to be an alternative source of measurements for regions with limited rain gauges. Howeve…	[Alharbi, Raied] King Saud Univ, Dept Civil Engn, Riyadh 12372, Saudi Arabia; [Alharbi, Raied; Hsu, Kuolin; Sorooshian, Soroosh] Univ Calif Irvine, Dept Civil & Environm Engn, E-4130 Engn Gateway, Irvine, CA 92697 USA	5	10.1007/s12517-018-3860-4
148	Algaydi, Bander A. M.; Subyani, Ali M.; Hamza, Mohamed H. M. M.	Investigation of Groundwater Potential Zones in Hard Rock Terrain, Wadi Na'man, Saudi Arabia		In arid and hyper-arid zones, groundwater exploration is one of the most significant ways to locate potential new water supplies. Geophysical prospecting is currently the most successfully used method for locating new supplies, but it is rather costly. Satellite remote sensing (RS) detection, however, with its integration of Geographic Information Systems (GIS) provides the best chance for identi…	[Algaydi, Bander A. M.] Saudi Geol Survey, Jeddah, Saudi Arabia; [Subyani, Ali M.] King Abdulaziz Univ, Fac Earth Sci, Hydrogeol Dept, Jeddah, Saudi Arabia; [Hamza, Mohamed H. M. M.] King Abdulaziz Univ, Fac Arts & Humanities, Geog & GIS Dept, Jeddah, Saudi Arabia; [Hamza, Mohamed H. M. M.] Fac Sci Tunis, Dept Geol, Geomat Earth & Planning Sect, Tunis, Tunisia	8	10.1111/gwat.12870
149	Bibi, Mariem; Saad, Mohamed; Masmoudi, Mohamed; Laurent, Benoit; Alfaro, Stephane C.	Long-term (1980-2018) spatial and temporal variability of the atmospheric dust load and deposition fluxes along the North-African coast of the Mediterranean Sea	Mediterranean; Mineral dust; Optical depth; Surface concentration; Deposition; MERRA-2	The Sahara is a major source of mineral particles for the Mediterranean Sea. The air-suspended particles alter the radiative transfer of solar and terrestrial radiation and the input of nutrients resulting from the deposition of mineral dust into the surface waters is thought to be essential for the development of marine ecosystems. In order to document the spatial and temporal variabilities of t…	[Bibi, Mariem; Saad, Mohamed; Masmoudi, Mohamed] Sfax Univ, Fac Sci Sfax, Phys Dept, Soukra Rd, Sfax 3038, Tunisia; [Laurent, Benoit; Alfaro, Stephane C.] Univ Paris Est Creteil & Paris Diderot, IPSL, LISA UMR CNRS 7583, Creteil, France	5	10.1016/j.atmosres.2019.104689
150	Bachagha, Nabil; Wang, Xinyuan; Luo, Lei; Li, Li; Khatteli, Houcine; Lasaponara, Rosa	Remote sensing and GIS techniques for reconstructing the military fort system on the Roman boundary (Tunisian section) and identifying archaeological sites	Remote sensing; Archaeology; Limes; High-resolution; LISA; Military; Roman	Southern Tunisia is one of the most significant areas of historical and archaeological interest as, since the Roman period, it has played a key role as a land bridge controlling the passage from the Saharan plain to plateaus and to the north of the mountain range between Chebika and Metlaoui. Because of the difficult geography, the investigation of ancient sites in this region is not easy and, th…	[Bachagha, Nabil; Wang, Xinyuan; Luo, Lei; Li, Li; Lasaponara, Rosa] Chinese Acad Sci, Inst Remote Sensing & Digital Earth RADI, Key Lab Digital Earth Sci, Beijing 100094, Peoples R China; [Bachagha, Nabil; Wang, Xinyuan; Luo, Lei; Li, Li] UNESCO, Int Ctr Space Technol Nat & Cultural Heritage Aus, Beijing 100094, Peoples R China; [Bachagha, Nabil] UCAS, Beijing 100094, Peoples R China; [Khatteli,…	21	10.1016/j.rse.2019.111418
151	Almalki, Malk; Alkahtani, Mohammed	Allocation of Regional Logistics Hubs and Assessing Their Contribution to Saudi Arabia's Logistics Performance Index Ranking	integer linear programming (ILP); Logistics Performance Index (LPI); logistics hub location problem (LHLP); geographic information system (GIS)	In 2016, Saudi Arabia published its vision for the year 2030, which is based on the Kingdom's geographical, financial, social and religious potentials. Developing the logistics sector and improving the Kingdom's ranking in the World Bank's Logistics Performance Index (LPI) to the twenty-fifth rank was one of the most targeted success factors. Unfortunately, Saudi Arabia's rank in this index has d…	[Almalki, Malk; Alkahtani, Mohammed] King Saud Univ, Coll Engn, Ind Engn Dept, Riyadh 11421, Saudi Arabia	0	10.3390/su14127474
152	Butt, Mohsin Jamil, I; Mashat, AbdulWahab S.	MODIS satellite data evaluation for sand and dust storm monitoring in Saudi Arabia		The impacts of wind-blown desert sand and dust are a major concern of environmental and climate study due to their global extent. This article investigates the sand and dust storms detection in Saudi Arabia using Moderate Resolution Imaging Spectroradiometer (MODIS) data, both from Terra and Aqua satellite systems for the years 2002-2011. Normalized Difference Dust Index (NDDI) is applied for the…	[Butt, Mohsin Jamil, I; Mashat, AbdulWahab S.] King Abdulaziz Univ, Dept Meteorol, Jeddah, Saudi Arabia	15	10.1080/01431161.2018.1488293
153	Ahmed, Mohamed	Sustainable management scenarios for northern Africa's fossil aquifer systems	Groundwater sustainability; Fossil aquifers; GRACE-FO; Northern Africa	Achieving sustainability for the groundwater resources is more crucial and challenging in northern Africa than in any other part of the globe. We integrated temporal (April 2002-September 2019) terrestrial water storage (TWS) data derived from the Gravity Recovery and Climate Experiment (GRACE; April 2002-June 2017) and GRACE-Follow On (GRACE-FO; June 2018-present) missions with soil moisture, al…	[Ahmed, Mohamed] Texas A&M Univ Corpus Christi, Dept Phys & Environm Sci, 6300 Ocean Dr, Corpus Christi, TX 78412 USA	14	10.1016/j.jhydrol.2020.125196
154	Yousef, Ghada A.; Elazony, Mona A.; Abdelsattar, Amal; Sewailam, Mohamed M.; Elsaid, Omnia H.	Applying an integrated Remote Sensing-GIS approach in the documentation of handicraft centers at New Valley Governorate, Egypt	GIS; Remote Sensing; Handicraft; Cultural Heritage	The intangible cultural heritage is considered part of the identity and history of any country as well as it plays a vital role in economics. Traditional craftsmanship is perhaps the most tangible manifestation of intangible cultural heritage. Egypt's heritage in handicrafts is rich, unique and diversified, all stemming from its long history. The handicraft centers are available in all the govern…	[Yousef, Ghada A.; Elazony, Mona A.; Sewailam, Mohamed M.; Elsaid, Omnia H.] Natl Author Remote Sensing & Space Sci NARSS, Cairo, Egypt; [Abdelsattar, Amal] Prince Sultan Univ, Riyadh, Saudi Arabia	0	10.1016/j.ejrs.2022.04.004
155	Ghoneim, S. M.; Yehia, M. A.; Salem, S. M.; Ali, H. F.	Integrating remote sensing data, GIS analysis and field studies for mapping alteration zones at Wadi Saqia area, central Eastern Desert, Egypt	Remote sensing; GIS; ASTER; Weighted overlay; Alteration zones; Egypt	Remote sensing data, spectral analyses, Geographic Information System (GIS) tools and field work were integrated for detecting the spatial distribution of the alteration zones in the study area. Remote sensing studies including; spectral signatures analyses and satellite image processing, were used for identifying the alteration minerals setting of the study area then extracting the alteration zo…	[Ghoneim, S. M.; Salem, S. M.; Ali, H. F.] Natl Author Remote Sensing & Space Sci NARSS, Geol Div, Cairo, Egypt; [Yehia, M. A.] Ain Shams Univ, Dept Geol, Fac Sci, Cairo, Egypt	3	10.1016/j.ejrs.2022.02.001
156	Khawaldah, H. A.; Farhan, I.; Alzboun, N. M.	Simulation and prediction of land use and land cover change using GIS, remote sensing and CA-Markov model	CA-Markov model; Jordan; Land use/land cover change (LULC); Population growth; Urban expansion	This study analyzes the characteristics of land use/land cover change in Jordan's Irbid governorate, 1984-2018, and predicts future land use/land cover for 2030 and 2050 using a cellular automata-Markov model. The results inform planners and decision makers of past and current spatial dynamics of land use/land cover change and predicted urban expansion, for a better understanding and successful p…	[Khawaldah, H. A.; Farhan, I.; Alzboun, N. M.] Univ Jordan, Fac Arts, Dept Geog, Amman, Jordan	18	10.22034/gjesm.2020.02.07
157	Allafta, Hadi; Opp, Christian	Soil Erosion Assessment Using the RUSLE Model, Remote Sensing, and GIS in the Shatt Al-Arab Basin (Iraq-Iran)	geographic information system; remote sensing; revised universal soil loss equation; Shatt Al-Arab basin; soil erosion	In the Shatt Al-Arab basin, soil erosion is a major problem due to the steepness of the terrain and the significant difference in altitude between the upstream and downstream parts of the basin. Vast quantities of soil are moved annually, resulting in massive repercussions including soil degradation, structural damage, biodiversity loss, and productivity reduction in the catchment area, huge sedi…	[Allafta, Hadi; Opp, Christian] Philipps Univ Marburg, Fac Geog, Deutschhausstr 10, D-35037 Marburg, Germany	5	10.3390/app12157776
158	Christensen, Britt; Khalil, Ali	Reporting Conflict from Afar: Journalists, Social Media, Communication Technologies, and War	Boundaries; communicative affordances; conflict journalism; digital media; MENA; trust-building; verification	We conducted interviews with conflict journalists who covered the conflicts in Syria, Yemen, Libya, and Iraq and who work for the major international news agencies and media companies. These journalists did most of their reporting from remote locations as the conflict zones were too dangerous to be physically present. We investigated how the journalist did their jobs with the communicative afford…	[Christensen, Britt] Notre Dame Maryland Univ, Commun Arts, Baltimore, MD 21210 USA; [Khalil, Ali] Zayed Univ, Coll Commun & Media Sci, Dubai, U Arab Emirates	1	10.1080/17512786.2021.1908839
159	Ozenen Kavlak, Mehtap; Cabuk, Saye Nihan; Cetin, Mehmet	Development of forest fire risk map using geographical information systems and remote sensing capabilities: oren case	Forest fire risk map; GIS; NBR; NDVI; Remote sensing; Weighted overlay	Forest fires globally cause severe losses in vegetation, soil and habitats and inevitably have direct and indirect negative environmental impacts such as deforestation, climate change and drought. According to the official records, there has been an increase of 58% in the number of the forest fires in Turkey in the last 30 years, between 1988 and 2018. Therefore, it is vital to determine the fore…	[Ozenen Kavlak, Mehtap] Eskisehir Tech Univ, Inst Grad Programs, Dept Remote Sensing & Geog Informat Syst, TR-26555 Eskisehir, Turkey; [Cabuk, Saye Nihan] Eskisehir Tech Univ, Inst Earth & Space Sci, Dept Geodesy & Geog Informat Technol, TR-26555 Eskisehir, Turkey; [Cetin, Mehmet] Kastamonu Univ, Dept Landscape Architecture, Fac Engn & Architecture, Kastamonu, Turkey	11	10.1007/s11356-021-13080-9
160	Jamali, A. A.; Zarekia, S.; Randhir, T. O.	RISK ASSESSMENT OF SAND DUNE DISASTER IN RELATION TO GEOMORPHIC PROPERTIES AND VULNERABILITY IN THE SADUQ-YAZD ERG	neural network; sand dunes; satellite image; remote sensing; Yazd; Iran	Sand dunes occupy a vast expanse of desert area in Iran and they are considered as a threat for urban areas and agricultural lands. Erg is an area of desert covered with shifting sand dunes. Saduq (Ashkezar) city, located in the west and northwest of the Yazd City, Iran, is surrounded by these mobile sand dunes. The aim of this study was the risk assessment of sand dune disaster in relation to ge…	[Jamali, A. A.] Islamic Azad Univ, Maybod Branch, Dept GIS RS & Watershed Management, Maybod, Iran; [Zarekia, S.] AREEO, Yazd Agr & Nat Resources Res & Educ Ctr, Rangeland & Forest Res Div, Yazd, Iran; [Randhir, T. O.] Univ Massachusetts, Dept Environm Conservat, Amherst, MA 01003 USA	8	10.15666/aeer/1601_579590
161	Senouci, Rachida; Taibi, Nasr-Eddine; Teodoro, Ana Claudia; Duarte, Lia; Mansour, Hamidi; Yahia Meddah, Rabia	GIS-Based Expert Knowledge for Landslide Susceptibility Mapping (LSM): Case of Mostaganem Coast District, West of Algeria	controlling-parameters; remote sensing; GIS; knowledge driven approach; analytical hierarchy process; weighted overlay method	Landslides are one of the natural disasters that affect socioeconomic wellbeing. Accordingly, this work aimed to realize a landslide susceptibility map in the coastal district of Mostaganem (Western Algeria). For this purpose, we applied a knowledge-driven approach and the Analytical Hierarchy Process (AHP) in a Geographical Information System (GIS) environment. We combined landslide-controlling …	[Senouci, Rachida; Taibi, Nasr-Eddine] Univ Mostaganem, Lab Protect & Dev Coastal Marine Resources & Mol, Dept Marine Sci & Aquaculture, Fac Nat & Life Sci, BP 227,Natl Rd 11, Kharrouba 27000, Mostaganem, Algeria; [Teodoro, Ana Claudia; Duarte, Lia] Univ Porto, Fac Sci, Dept Geosci Environm & Land Planning, P-4169007 Porto, Portugal; [Teodoro, Ana Claudia; Duarte, Lia] Univ Porto, Pole FCUP, Eart…	26	10.3390/su13020630
162	Subraelu, P.; Ebraheem, Abdel Azim; Sherif, Mohsen; Sefelnasr, Ahmed; Yagoub, M. M.; Rao, Kakani Nageswara	Land in Water: The Study of Land Reclamation and Artificial Islands Formation in the UAE Coastal Zone: A Remote Sensing and GIS Perspective	coastal emirates; artificial reclamation of islands; geoengineered shorelines; land use; land cover; UAE shoreline; geospatial analysis; GIS; remote sensing	The United Arab Emirate's rapid population growth is coupled with an increase in the consumption of natural resources such as fresh air, sunlight, land, and water. In the past two decades, the demand for land has augmented both away from the coast and significantly near the coast. Within coastal zones, artificial reclamation of land in the sea is the most desirable way to meet the demand for land…	[Subraelu, P.; Ebraheem, Abdel Azim; Sherif, Mohsen; Sefelnasr, Ahmed] United Arab Emirates Univ, Natl Water & Energy Ctr, POB 15551, Al Ain, U Arab Emirates; [Sherif, Mohsen] United Arab Emirates Univ, Coll Engn, Civil & Environm Engn Dept, POB 15551, Al Ain, U Arab Emirates; [Yagoub, M. M.] United Arab Emirates Univ, Coll Humanities & Social Sci, Dept Geog, POB 15551, Al Ain, U Arab Emirates; […	0	10.3390/land11112024
163	Nsanziyera, Ange Felix; Rhinane, Hassan; Oujaa, Aicha; Mubea, Kenneth	GIS and Remote-Sensing Application in Archaeological Site Mapping in the Awsard Area (Morocco)	analytic hierarchy process (AHP); archaeology; predictive model; tumuli; remote sensing; multi-criteria; Saharan Morocco	Morocco is famous as one of the archaeologically richest places with many sites. In addition, some of the sites have been listed as UNESCO World Human Heritage sites. In situ observations are used in cultural heritage and archaeological sites mapping. However, this procedure requires periodic observations, which are practically difficult to combine with traditional methods and practices since thi…	[Nsanziyera, Ange Felix; Rhinane, Hassan] Univ Hassan 2, Geosci Lab, BP 3366 Maarif, Casablanca 20100, Morocco; [Oujaa, Aicha] Inst Natl Sci Archeol & Patrimoine INSAP, BP 6828, Rabat 10000, Morocco; [Mubea, Kenneth] Reg Ctr Mapping Resources Dev, POB 632-00618, Nairobi 00100, Kenya	15	10.3390/geosciences8060207
164	Al-Khuzaie, Marwah M.; Janna, Hussein; Al-Ansari, Nadhir	Assessment model of water harvesting and storage location using GIS and remote sensing in Al-Qadisiyah, Iraq	Water availability; Remote sensing; Clean water quality; Rainwater harvesting; Runoff; Multi-criteria; GIS	One of the important steps towards optimizing land productivity and water availability for the semi-arid and arid areas is the identification of potential sites for water harvesting. Therefore, this paper uses the Geographical Information System (GIS) techniques to select the optimized sites for water harvesting in Al-Qadisiyah Governorate, Iraq. Geographic water management capabilities are appli…	[Al-Khuzaie, Marwah M.; Janna, Hussein] Univ Al Qadisiyah, Coll Engn, Civil Engn Dept, Al Qadisiyah, Iraq; [Al-Ansari, Nadhir] Lulea Univ, Dept Civil Environmenta & Nat Resources Engn, Lulea, Sweden	6	10.1007/s12517-020-06154-4
165	Jaafar, Hadi; Sujud, Lara; Woertz, Eckart	Scorched earth tactics of the Islamic State after its loss of territory: intentional burning of farmland in Iraq and Syria	Fire; Conflict; ISIS; Remote sensing; VIIRS; dNBR; Terrorism	Recent literature shows increasing interest in analyzing causes of what was referred to as unusual fires in Iraq and Syria in 2019. Here, we examine the causes of uncontrolled and irregular fires within farmlands in parts of the two countries in 2019-2020 and quantify their extent spatiotemporally using a combination of medium and coarse-resolution satellite imagery, land cover, precipitation, te…	[Jaafar, Hadi; Sujud, Lara] Amer Univ Beirut, Dept Agr, Fac Agr & Food Sci, Beirut, Lebanon; [Woertz, Eckart] German Inst Global & Area Studies GIGA, Hamburg, Germany; [Woertz, Eckart] Univ Hamburg, Hamburg, Germany	0	10.1007/s10113-022-01976-2
166	Hedayati, Amir; Vahidnia, Mohammad H.; Behzadi, Saeed	Paddy lands detection using Landsat-8 satellite images and object-based classification in Rasht city, Iran	GIS; Earth observation; Confusion matrix; eCognition	Rice is one of the most important food staples in many countries, particularly Iran. Because irrigated rice production differs from other agricultural fields, this study developed a paddy field mapping model based on phenological aspects, various satellite sensor data, and an object-based approach. This study uses the phonological features of rice plants as well as annual data on land surface tem…	[Hedayati, Amir; Vahidnia, Mohammad H.] Islamic Azad Univ, Fac Nat Resources & Environm, Dept Remote Sensing & GIS, Sci & Res Branch, Tehran, Iran; [Behzadi, Saeed] Shahid Rajaee Teacher Training Univ, Fac Civil Engn, Dept Surveying Engn, Tehran, Iran	5	10.1016/j.ejrs.2021.12.008
167	Suarez, Nydia C. Reyes; Cook, Michael S.; Gacic, Miroslav; Paduan, Jeffrey D.; Drago, Aldo; Cardin, Vanessa	Sea Surface Circulation Structures in the Malta-Sicily Channel from Remote Sensing Data	remote sensing; high frequency radar; Malta-Sicily Channel; Malta Sicily Gyre; surface circulation	The Malta-Sicily Channel is part of the Sicily Channel system where water and thermohaline properties between the Eastern and Western Mediterranean basins take place. Several mesoscales features are detached from the main circulation due to wind and bathymetric forcing. In this paper, surface circulation structures are studied using different remotely sensed datasets: satellite data (absolute dyn…	[Suarez, Nydia C. Reyes; Cardin, Vanessa] Ist Nazl Oceanog & Geofis Sperimentale OGS, I-34010 Sgonico, TS, Italy; [Suarez, Nydia C. Reyes; Gacic, Miroslav] Abdus Salam Int Ctr Theoret Phys ICTP, TRIL Programme, I-34151 Trieste, Italy; [Cook, Michael S.; Paduan, Jeffrey D.] NPS, Dept Oceanog, Monterey, CA 93943 USA; [Drago, Aldo] Univ Malta, Dept Geosci, Phys Oceanog Res Grp, Msida 2080, Malta	5	10.3390/w11081589
168	Prasad, Vinay; Haslam, Alyson; Tuia, Jordan	A preliminary study of the rate of hospitals and satellite clinics worldwide for top US cancer centers	International healthcare; Healthcare business expansion; Top-ranked cancer centers	Introduction: Healthcare is a globalized endeavor. With an increasing number of overseas collaborations being announced as profit-driven business structures, we sought to investigate the prevalence of the top-ranked United States (US) cancer hospitals investing in overseas hospitals.Method: We conducted a web search of publicly available information to determine the frequency in which US hospital…	[Prasad, Vinay; Haslam, Alyson; Tuia, Jordan] Univ Calif San Francisco, Dept Epidemiol & Biostat, 550 16th St, San Francisco, CA 94158 USA	0	10.1016/j.jcpo.2021.100319
169	El Kenawy, Ahmed M.; McCabe, Matthew F.; Lopez-Moreno, Juan I.; Hathal, Yossef; Robaa, S. M.; Al Budeiri, Ahmed L.; Jadoon, Khan Zaib; Abouelmagd, Abdou; Eddenjal, Ali; Dominguez-Castro, Fernando; Trigo, Ricardo M.; Vicente-Serrano, Sergio M.	Spatial assessment of the performance of multiple high-resolution satellite-based precipitation data sets over the Middle East	CMORPH; extreme wet events; Middle East; PERSIANN; rainfall; TRMM-3B42	This study presents the first comprehensive evaluation of the performance of three globally high-resolution remotely sensed products in replicating the main characteristics of rainfall over the Middle East, with special emphasis on extreme wet events. Specifically, we employed daily observational data from a network of rain gauges (N=217), spanning the retrospective period 1998-2013 and covering …	[El Kenawy, Ahmed M.; Lopez-Moreno, Juan I.; Dominguez-Castro, Fernando; Vicente-Serrano, Sergio M.] Inst Pirena Ecol, Campus Aula Dei,Avda Montanana, Zaragoza 50059, Spain; [El Kenawy, Ahmed M.] Mansoura Univ, Dept Geog, Mansoura, Egypt; [McCabe, Matthew F.] King Abdullah Univ Sci & Technol, Div Biol & Environm Sci & Engn, Thuwal, Saudi Arabia; [Hathal, Yossef; Al Budeiri, Ahmed L.] Baghdad Univ…	8	10.1002/joc.5968
170	Albarakat, Reyadh; Le, Manh-Hung; Lakshmi, Venkataraman	Assessment of drought conditions over Iraqi transboundary rivers using FLDAS and satellite datasets	Iraq; Middle East; Transboundary river; Drought; FLDAS; AVHRR; LANDSAT	Study region: Middle East. Study focus: Droughts are a major natural disaster in almost every region of the world, causing negative impacts on natural resources and water basin management. However, it is challenging to study drought mechanisms in transboundary rivers where hydrometeorological observations are often not available or limited due to administrative issues. This study aims to assess d…	[Albarakat, Reyadh; Le, Manh-Hung; Lakshmi, Venkataraman] Univ Virginia, Dept Engn Syst & Environm, Charlottesville, VA 22904 USA	2	10.1016/j.ejrh.2022.101075
171	Makki, Zaid F.; Zuhaira, Ali Adel; Al-Jubouri, Sama M.; Al-Hamd, Rwayda Kh. S.; Cunningham, Lee S.	GIS-based assessment of groundwater quality for drinking and irrigation purposes in central Iraq	Groundwater quality; Geographic information system; Remote sensing water quality index and irrigation water quality index	In many parts of the world, groundwater is considered to be a key source of fresh water for both the domestic and non-domestic sectors. Where groundwater extraction is implemented, systems to monitor water quality must ensure a safe and sustainable supply. Over the years, Iraq has suffered from surface water quality and supply problems, necessitating groundwater extraction in many regions. This s…	[Makki, Zaid F.] Alnahrain Ctr Strateg Studies, Baghdad, Iraq; [Zuhaira, Ali Adel] Al Furat Al Awsat Tech Univ, Tech Inst Najaf, Najaf 54003, Iraq; [Al-Jubouri, Sama M.] Univ Baghdad, Dept Chem Engn, Coll Engn, POB 47024, Baghdad, Iraq; [Al-Hamd, Rwayda Kh. S.] Abertay Univ, Sch Appl Sci, Dundee DD1 1HG, Scotland; [Cunningham, Lee S.] Univ Manchester, Dept Mech Aerosp & Civil Engn, Manchester M13…	11	10.1007/s10661-021-08858-w
172	Sahahiri, Riyan; Arrowsmith, Colin; Alitany, Arq Ayman	Mapping the historical places: A case study of promoting tourism in Jeddah, the Kingdom of Saudi Arabia	Old Jeddah; Al-Balad; tourism; GIS; heritage; Geo database	The Kingdom of Saudi Arabia (KSA) is trying to build up a viable tourism industry that reflects the Islamic principles, heritage and traditions. In Saudi Vision 2030 '' a special consideration has been given to develop and promote the state's tourism, entertainment and quality of life. Jeddah is the second capital of KSA and Al-Balad is the most historic quarter that is situated in the core of Je…	[Sahahiri, Riyan] RMIT Univ, Geospatial Dept, Melbourne, Vic, Australia; [Arrowsmith, Colin] King Abdulaziz Univ, Geomat Dept, Jeddah, Saudi Arabia; [Alitany, Arq Ayman] King Abdulaziz Univ, Dept Architecture, Jeddah, Saudi Arabia	3	10.1080/23311983.2019.1691315
173	Laugier, Elise Jakoby; Casana, Jesse	Integrating Satellite, UAV, and Ground-Based Remote Sensing in Archaeology: An Exploration of Pre-Modern Land Use in Northeastern Iraq	land use; archaeology; agriculture; Mesopotamia; ancient Iraq; historic imagery; CORONA; UAVs; multispectral; magnetometry	Satellite remote sensing is well demonstrated to be a powerful tool for investigating ancient land use in Southwest Asia. However, few regional studies have systematically integrated satellite-based observations with more intensive remote sensing technologies, such as drone-deployed multispectral sensors and ground-based geophysics, to explore off-site areas. Here, we integrate remote sensing dat…	[Laugier, Elise Jakoby; Casana, Jesse] Dartmouth Coll, Dept Anthropol, Silsby Hall 406, Hanover, NH 03755 USA; [Laugier, Elise Jakoby] Dartmouth Coll, Ecol Evolut Environm & Soc EEES, Silsby Hall 406, Hanover, NH 03755 USA; [Laugier, Elise Jakoby] Rutgers State Univ, Dept Anthropol, 131 George St,Ruth Adams Bldg Suite 306, New Brunswick, NJ 08901 USA	2	10.3390/rs13245119
174	Hoffner, Sven; Hadadi, Maryam; Rajaei, Esmaeil; Farnia, Parissa; Ahmadi, Mojtaba; Jaberansari, Ziba; Velayati, Ali Akbar	Geographic characterization of the tuberculosis epidemiology in iran using a geographical information system	Epidemiology; geographic characterization; geographical information system; Mycobacterium tuberculosis	Background: Medical geographic information systems (Medical GIS) has a pronounced capacity to help us understand infectious disease epidemiology, and the transmission of pathogens in a defined geographical area over time. This could not only help us increase the understanding of public health, but also be a most useful base for medical intervention as improved infection control where it is most n…	[Hoffner, Sven] Karolinska Inst, Dept Microbiol Tumor & Cell Biol, Stockholm, Sweden; [Hadadi, Maryam; Rajaei, Esmaeil; Farnia, Parissa; Ahmadi, Mojtaba; Jaberansari, Ziba; Velayati, Ali Akbar] Shahid Beheshti Univ Med Sci, Mycobacteriol Res Ctr, Natl Res Inst TB & Lung Dis, Tehran, Iran	3	10.4103/bbrj.bbrj_72_18
175	Rezaei, Mohammad; Mielonen, Tero; Farajzadeh, Manuchehr	Climatology of atmospheric dust corridors in the Middle East based on satellite data	Dust aerosols; Connected components; Atmospheric dust corridors; Middle East	Dust aerosols can sometimes extend thousands of kilometers continuously in the atmosphere. In this study, we refer to these dust streams, as Atmospheric Dust Corridors (ADCs). This study aims to identify ADCs by an automated algorithm and investigate their temporal and spatial characteristics in the Middle East. In order to do this, the Aerosol Optical Depth (AOD) and Angstrom Exponent (AE) data …	[Rezaei, Mohammad; Farajzadeh, Manuchehr] Tarbiat Modares Univ, Dept Geog, Tehran, Iran; [Mielonen, Tero] Finnish Meteorol Inst, POB 1627, FI-70211 Kuopio, Finland	0	10.1016/j.atmosres.2022.106454
176	El Jazouli, Aafaf; Barakat, Ahmed; Khellouk, Rida; Rais, Jamila; El Baghdadi, Mohamed	Remote sensing and GIS techniques for prediction of land use land cover change effects on soil erosion in the high basin of the Oum Er Rbia River (Morocco)	Oum Er Rbia high-basin; Soil erosion; LULC; Remote sensing; GIS; CA_Markov model; RUSLE	Soil erosion by water is one of the most important causes of land degradation throughout the world, particularly in arid and semi-arid areas. The high basin of the Oum Er Rbia River, located in the Middle Atlas (Morocco), is a mountainous area dominated by steep slopes and clayey soils, which make it vulnerable to soil erosion due to human activities and severe weather. Multidate satellite images…	[El Jazouli, Aafaf; Barakat, Ahmed; Khellouk, Rida; Rais, Jamila; El Baghdadi, Mohamed] Sultan My Slimane Univ, Fac Sci & Tech, Georessources & Environm Lab, Beni Mellal, Morocco	52	10.1016/j.rsase.2018.12.004
177	Karami, Sara; Hamzeh, Nasim Hossein; Alam, Khan; Ranjbar, Abbas	The study of a rare frontal dust storm with snow and rain fall: Model results and ground measurements	Dust; Snow & rainfall; WRF-Chem model; NAAPS model; Frontal system	Dust plays an important role in the modification of microphysical and optical properties of clouds. The presence of dust at an elevated level significantly increases snow mass and rain concentration. A rare phenomenon of rain and snowfall with dust was occurred simultaneously in the eastern Iraq, Syria, and west and south west of Iran on 19 and 20 January 2018. In the meantime, while the dust imp…	[Karami, Sara; Hamzeh, Nasim Hossein; Ranjbar, Abbas] Dept Atmospher Sci & Meteorol Res Ctr ASMERC, Tehran, Iran; [Alam, Khan] Univ Peshawar, Dept Phys, Peshawar 25120, Kpk, Pakistan	4	10.1016/j.jastp.2019.105149
178	Laaribya, Said; Alaoui, Assmaa; Ayan, Sezgin; Benabou, Abdelkader	Spatial Analysis of the Degraded Forest Areas in Idmine Forest-Morocco Using Geoscience Capabilities	GIS; Remote Sensing; Vegetation Index; Degradation	Aim of study: The aim of the study is to present a diagnosis for the state of Argan forest degradation in Morocco through GIS and remote sensing utilizing Sentinel 2 satellite images of the year 2019 (dated 28/08/2019). Area of study: The study was carried out in a forest commune in Idmine, South West Morocco, which is located in semi-arid bioclimatic region. Material and methods: In the study, t…	[Laaribya, Said] Chouaib Doukkali Univ, Geog Dept, El Jadida, Morocco; [Alaoui, Assmaa] Ibn Zohr Univ LBVRN, Biol Dept, Agadir, Morocco; [Ayan, Sezgin] Kastamonu Univ, Fac Forestry, Silviculture Dept, Kastamonu, Turkey; [Benabou, Abdelkader] Mohammed V Univ, Biol Dept, Rabat, Morocco	0	10.17475/kastorman.908568
179	Wehbe, Youssef; Temimi, Marouane	A Remote Sensing-Based Assessment of Water Resources in the Arabian Peninsula	precipitation; soil moisture; water storage; change point; Arabian Peninsula	A better understanding of the spatiotemporal distribution of water resources is crucial for the sustainable development of hyper-arid regions. Here, we focus on the Arabian Peninsula (AP) and use remotely sensed data to (i) analyze the local climatology of total water storage (TWS), precipitation, and soil moisture; (ii) characterize their temporal variability and spatial distribution; and (iii) …	[Wehbe, Youssef] Natl Ctr Meteorol NCM, POB 4815, Abu Dhabi, U Arab Emirates; [Temimi, Marouane] Stevens Inst Technol, Dept Civil Environm & Ocean Engn CEOE, Hoboken, NJ 07030 USA	17	10.3390/rs13020247
180	Rees, ALan F.; Papathanasopoulou, Nancy; Godley, Brendan J.	Tracking Hawksbills in Kuwait: Contributions to Regional Behavioral Insights		Hawksbill turtles from nesting areas in the south of the Arabian/Persian Gulf have been shown to migrate to numerous individual foraging sites across the region and undertake summer migration loops (SMLs) to avoid the most extreme sea temperatures. We tracked hawksbills nesting in Kuwait (n = 4) that migrated to hitherto undescribed foraging sites but showed no evidence of SMLs despite experienci…	[Rees, ALan F.; Godley, Brendan J.] Univ Exeter, Ctr Ecol & Conservat, Penryn TR10 9FE, England; [Papathanasopoulou, Nancy] Dafnomili 52, Athens 11471, Greece	4	10.2744/CCB-1368.1
181	Ibrahim, Majed; Shatnawi, Amjed	Delineating potential sites for artificial groundwater recharge using a mathematical approach to remote sensing and GIS techniques	Al-Sarhan Basin; Arid region; artificial recharge; groundwater; remote sensing	The management of the available groundwater resources is vital in arid and semi-arid regions. Artificial recharging should be integrated with the groundwater resources to maintain long-term water sustainability. This study applied the cost-effective and time-saving techniques of remote sensing and GIS to delineate the groundwater recharge potential in the Al-Sarhan Basin, located in arid and semi…	[Ibrahim, Majed] Al al Bayt Univ, Geog Informat Syst & Remote Sensing Dept, Mafraq, Jordan; [Shatnawi, Amjed] Al al Bayt Univ, Earth & Environm Sci Dept, Mafraq, Jordan	0	10.2166/ws.2022.046
182	Alitane, Abdennabi; Essahlaoui, Ali; El Hafyani, Mohammed; El Hmaidi, Abdellah; El Ouali, Anas; Kassou, Amina; El Yousfi, Yassine; van Griensven, Ann; Chawanda, Celray James; Van Rompaey, Anton	Water Erosion Monitoring and Prediction in Response to the Effects of Climate Change Using RUSLE and SWAT Equations: Case of R'Dom Watershed in Morocco	soil erosion; RUSLE; SWAT; classical statistical downscaling model; remote sensing; GIS tools; R'Dom watershed	Soil erosion is an increasingly issue worldwide, due to several factors including climate variations and humans' activities, especially in Mediterranean ecosystems. Therefore, the aim of this paper is: (i) to quantify and to predict soil erosion rate for the baseline period (2000-2013) and a future period (2014-2027), using the Revised Universal Soil Loss Equation (RUSLE) and the Soil and Water A…	[Alitane, Abdennabi; Essahlaoui, Ali; El Hafyani, Mohammed; El Hmaidi, Abdellah] Moulay Ismail Univ, Res Grp Water Sci & Environm Engn, Geoengn & Environm Lab, Fac Sci,Dept Geol, Marjane 2,BP 298, Meknes, Morocco; [El Ouali, Anas] Sidi Mohamed Ben Abdellah Univ, Fac Sci & Technol, Funct Ecol & Environm Engn Lab, BP 262, Fes, Morocco; [Kassou, Amina] Moulay Ismail Univ, Fac Sci & Tech, Georesource…	5	10.3390/land11010093
183	Pravalie, Remus; Patriche, Cristian; Bandoc, Georgeta	Spatial assessment of solar energy potential at global scale. A geographical approach	Solar energy; Global horizontal irradiation; Direct normal irradiation; Solar resources; Photovoltaic systems; Concentrating solar power systems; Global analysis	Solar energy is a key renewable source for decarbonization and the future sustainable development of human society. However, the success of the worldwide governments in the large-scale implementation of solar technologies largely depends on the in-depth knowledge of global solar radiation distribution and intensity levels, which is a difficult endeavour due to the fact that up-to-date global-scal…	[Pravalie, Remus; Bandoc, Georgeta] Univ Bucharest, Fac Geog, Ctr Coastal Res & Environm Protect, 1 Nicolae Balcescu Str, Bucharest 010041, Romania; [Patriche, Cristian] Romanian Acad, Iasi Div, Geog Dept, 8 Carol I Str, Iasi 700505, Romania; [Bandoc, Georgeta] Acad Romanian Scientists, 54 Splaiul Independentei Str, Bucharest, Romania	69	10.1016/j.jclepro.2018.10.239
184	Abdelkarim, Ashraf; Gaber, Ahmed F. D.; Youssef, Ahmed M.; Pradhan, Biswajeet	Flood Hazard Assessment of the Urban Area of Tabuk City, Kingdom of Saudi Arabia by Integrating Spatial-Based Hydrologic and Hydrodynamic Modeling	sustainable urban development; remote sensing; GIS; hydrologic modeling; hydraulic modeling (HEC-RAS); flood hazard; Tabuk City; Kingdom of Saudi Arabia	This study deals with the use of remote sensing (RS), geographic information systems (GISs), hydrologic modeling (water modeling system, WMS), and hydraulic modeling (Hydrologic Engineering Center River Analysis System, HEC-RAS) to evaluate the impact of flash flood hazards on the sustainable urban development of Tabuk City, Kingdom of Saudi Arabia (KSA). Determining the impact of flood hazards o…	[Abdelkarim, Ashraf] Minist Housing, Res Ctr, Riyadh 68222, Saudi Arabia; [Gaber, Ahmed F. D.] Sohag Univ, Fac Art, Dept Geog, Sohag 82524, Egypt; [Gaber, Ahmed F. D.] Imam Abdulrahman Bin Faisal Univ, Coll Arts, Geog & GIS Dept, Dammam 31441, Saudi Arabia; [Youssef, Ahmed M.] Sohag Univ, Fac Sci, Dept Geol, Sohag 82524, Egypt; [Youssef, Ahmed M.] Saudi Geol Survey, Geol Hazards Dept, Appl Geol S…	23	10.3390/s19051024
185	Gubran, Mohammed; Ghrefat, Habes; Zaidi, Faisal; Shehata, Mohamed	Integration of hydrochemical, GIS, and remote-sensing data for assessment of shallow groundwater aquifers in Wadi Nisah, Central Saudi Arabia	Groundwater; Water quality; GIS; Remote sensing; Statistical analysis; Saudi Arabia	Groundwater samples were collected in May 2015 from 23 wells distributed in the western part of Wadi Nisah, mainly used for irrigation. Calculation of saturation indices showed that the samples were generally undersaturated with respect to halite, gypsum, anhydrite, calcite, and aragonite. Groundwater facies analysis showed that most of the collected samples were dominated by Ca-Na-SO4-type water…	[Gubran, Mohammed; Ghrefat, Habes; Zaidi, Faisal] King Saud Univ, Coll Sci, Dept Geol & Geophys, Riyadh, Saudi Arabia; [Shehata, Mohamed] Zagazig Univ, Fac Sci, Dept Geol, Zagazig, Egypt	7	10.1007/s12665-019-8164-9
186	Bentchakal, Malika; Medjerab, Abderrahmane; Chibane, Brahim; Rahmani, Salah Eddine Ali	Meteorological drought and remote sensing data: an approach to assess fire risks in the Algerian forest	Drought; Risk of forest fires; Rainfall; SPI; NDVI	The risk of forest fires is one of the main environmental, social, and economic problems facing the countries of the Mediterranean basin, in particular Algeria, Morocco, Portugal, Spain, and France. For several decades, thousands of hectares in northern Algeria have been highly vulnerable and vulnerable to this scourge. In northwestern Algeria, the decline in rainfall is particularly pronounced i…	[Bentchakal, Malika; Medjerab, Abderrahmane] Univ Sci & Technol Houari Boumediene USTHB, Fac Earth Sci Geog & Terr Planning, Lab Res & Studies Planning & Urbanism REAU, Bab Ezzouar, BP 32 El Alia, Algiers 16111, Algeria; [Chibane, Brahim; Rahmani, Salah Eddine Ali] Univ Sci & Technol Houari Boumediene USTHB, Fac Earth Sci Geog & Terr Planning, Geoenvironm Lab LGE, BP 32 El Alia, Algiers 16111, Al…	1	10.1007/s40808-021-01323-0
187	Issaoui, Wissal; Aydi, Abdelwaheb; Mahmoudi, Marwa; Cilek, Muge Unal; Abichou, Tarek	GIS-based multi-criteria evaluation for olive mill wastewater disposal site selection	Multi-criteria analysis; Olive mill wastewater; Geographical information system (GIS); Disposal sites; Weighted linear combination (WLC)	The installation of an olive mill wastewater (OMW) disposal site without well-defined standards and constraints may cause undesirable long-term effects on soils and groundwater. In Tunisia and other developing countries, there are no solid waste control regulations to control the location selection of disposal sites. In this study, the OMW disposal site criteria established in Greece, Turkey, and…	[Issaoui, Wissal; Aydi, Abdelwaheb] Carthage Univ, Fac Sci Bizerte, Dept Earth Sci, Jarzouna 7021, Bizerte, Tunisia; [Issaoui, Wissal] Univ Tunis El Manar, Fac Sci Tunis, UR GAMM, Tunis 2092, Tunisia; [Mahmoudi, Marwa] Univ Tunis El Manar, Fac Sci Tunis, Dept Geol, Tunis 2092, Tunisia; [Cilek, Muge Unal] Cukurova Univ, Fac Architecture, Landscape Architecture Dept, TR-01330 Adana, Turkey; [Abicho…	2	10.1007/s10163-021-01231-6
188	Arca, Deniz; Keskin Citiroglu, Hulya	Geographical information systems-based analysis of site selection for wind power plants in Kozlu District (Zonguldak-NW Turkey) by multi-criteria decision analysis method	Wind power plant (WPP); site selection; geographical information systems (GIS); multi-criteria decision analysis method (MCDA); Kozlu	This study aimed to examine the selection process of the installation sites for wind power plants (WPP) to be built in Kozlu district of Zonguldak province of Turkey in the framework of geographical factors and through the application of Geographic Information Systems (GIS) - Multi Criteria Decision Analysis (MCDA) methodology and ArcGIS 10.2 software. According to the results obtained from this …	[Arca, Deniz] Dokuz Eylul Univ, Izmir Vocat Sch, Dept Architecture & Urban Planning, Izmir, Turkey; [Keskin Citiroglu, Hulya] Directorate Investment Monitoring & Coordinat, Aydin, Turkey	6	10.1080/15567036.2020.1834030
189	Laachrate, Hibatoullah; Fadil, Abdelhamid	Assessment of Drought Using Earth Observation Data and Cloud Computing in Morocco for 2010-2020	Cloud Computing; Drought; Earth Observation; Google Earth Engine; Morocco Remote Sensing; Soil Moisture	Drought is an extreme event that has hit several countries in the world including Morocco. The aim of this research was to assess drought in Morocco with a view to providing information for planning and management of droughts. For this, three drought indices were chosen: Combined Drought Indicator (CDI), Soil Moisture Agricultural Drought Index (SMADI), and Microwave Integrated Drought Index (MID…	[Laachrate, Hibatoullah] Hassan II Univ, Ben Msik Fac Sci FSBM, Casablanca, Morocco; [Fadil, Abdelhamid] Hassania Sch Publ Works EHTP, Geomat & Data Sci, Dept Math Comp Sci & Geomat, Casablanca, Morocco	0	10.4018/IJAGR.298260
190	Mumtaz, Rafia; Baig, Shahbaz; Kazmi, Syed Saqib Ali; Ahmad, Farooq; Fatima, Iram; Ghauri, Badar	Delineation of groundwater prospective resources by exploiting geo-spatial decision-making techniques for the Kingdom of Saudi Arabia	Groundwater; Analytical hierarchical process; Multi-factor decision-making; Unsupervised classification	Saudi Arabia is a water deficit and an arid land with limited fresh water supplies. Owing to the burgeoning population, ascending living standards and desert agriculture, there is a tremendous stress on the current water reserves. Towards such ends, this paper introduces a remote sensing and geographic information system (GIS)-based multi-factor decision-making system to identify the regions in S…	[Mumtaz, Rafia; Ahmad, Farooq; Fatima, Iram] King Faisal Univ, Al Hasa, Saudi Arabia; [Mumtaz, Rafia] Natl Univ Sci & Technol, Sch Elect Engn & Comp Sci, Islamabad, Pakistan; [Baig, Shahbaz] Inst Space Technol, Islamabad, Pakistan; [Kazmi, Syed Saqib Ali] Natl Univ Sci & Technol, IGIS, Islamabad, Pakistan; [Ghauri, Badar] Inst Space Technol, Karachi, Pakistan	10	10.1007/s00521-018-3370-z
191	Fuladlu, Kamyar; Riza, Muge; Ilkan, Mustafa	Monitoring Urban Sprawl Using Time-Series Data: Famagusta Region of Northern Cyprus	Famagusta; geographical information system; Mediterranean Europe; remote sensing; time series; urban sprawl	Monitoring urban sprawl is a controversial topic among scholars. Many studies have tried to employ various methods for monitoring urban sprawl in cases of North American and Northern and Western European cities. Although numerous methods have been applied with great success in various developed countries, they are predominantly impractical for cases of developing Mediterranean European cities tha…	[Fuladlu, Kamyar; Riza, Muge; Ilkan, Mustafa] Eastern Mediterranean Univ, Famagusta, Northern Cyprus, Turkey	6	10.1177/21582440211007465
192	Abdelkareem, Mohamed; El-Din, Gamal M. Kamal; Osman, Ibrahim	An integrated approach for mapping mineral resources in the Eastern Desert of Egypt	Remote sensing; GIS; Mineral resources; Alteration zones	Observations of the Earth from space either by satellites or aircrafts are significant approaches for mineral exploration, because of their capability of revealing hydrothermal alteration minerals and sensing the surface/subsurface fracture/fault zones. A study area that is situated in the Pan-African belt of Egypt is tested for targeting potential area of mineral resources involved the hydrother…	[Abdelkareem, Mohamed; El-Din, Gamal M. Kamal] South Valley Univ, Fac Sci, Geol Dept, Qena 83523, Egypt; [Abdelkareem, Mohamed] Boston Univ, Ctr Remote Sensing, 725 Commonwealth Ave, Boston, MA 02215 USA; [El-Din, Gamal M. Kamal] Prince Sattam Bin Abdulaziz Univ, Al Kharj, Saudi Arabia; [Osman, Ibrahim] Egyptian Mineral Resources Author, Cairo, Egypt	16	10.1016/j.jag.2018.07.005
193	Ramadan, Rasha H.; Ramadan, Mona S.; Alkadi, Ibtesam I.; Alogayell, Haya M.; Ismail, Ismail Y.; Khairy, Nesren	Assessment of Sustainable World Heritage Areas in Saudi Arabia Based on Climate Change Impacts on Vulnerability Using RS and GIS	heritage site; climate change; vulnerable urban heritage; heritage climatology; SDGs; RS; GIS	Heritage is considered a pillar of civilized cultural identity and an important income resource. Climate change is one of the main threats to cultural heritage as fragile buildings are highly vulnerable to its impacts, as a result, many world heritage sites, unfortunately, have been lost. This study used Remote Sensing (RS) and Geographic Information Systems (GIS) to develop risk maps that determ…	[Ramadan, Rasha H.; Ramadan, Mona S.] Natl Author Remote Sensing & Space Sci NARSS, Urban Planning Dept, Environm Studies & Land Use Div, Cairo 11843, Egypt; [Alkadi, Ibtesam I.; Alogayell, Haya M.] Princess Nourah Bint Abdulrahman Univ, Coll Arts, Dept Geog, POB 84428, Riyadh 11671, Saudi Arabia; [Ismail, Ismail Y.] Monofiya Univ, Fac Art, Dept Geog, Shibin Al Kawm 32511, Egypt; [Khairy, Nesren]…	0	10.3390/su142315831
194	Hussein, Khalid; Alkaabi, Khaula; Ghebreyesus, Dawit; Liaqat, Muhammed Usman; Sharif, Hatim O.	Land use/land cover change along the Eastern Coast of the UAE and its impact on flooding risk	Land use land cover; remote sensing; GIS; flood risk assessment; UAE	This study was conducted to investigate the spatiotemporal changes of land use/land cover (LULC) along the eastern coast of the United Arab Emirates (UAE) over a 20-year period using an integration of remote sensing and Geographic Information Systems techniques. The impact of land use change on flooding potential was also investigated through hydrologic model simulations. Landsat images of the ye…	[Hussein, Khalid; Alkaabi, Khaula] Univ United Arab Emirates, Coll Humanities & Social Sci, Dept Geog & Urban Sustainabil, Al Ain, U Arab Emirates; [Hussein, Khalid] Univ Colorado, CIRES, Boulder, CO 80309 USA; [Ghebreyesus, Dawit; Sharif, Hatim O.] Univ Texas San Antonio, Dept Civil & Environm Engn, One UTSA Circle, San Antonio, TX USA; [Liaqat, Muhammed Usman] Univ United Arab Emirates, Coll En…	26	10.1080/19475705.2019.1707718
195	Rayne, Louise; Donoghue, Daniel	A Remote Sensing Approach for Mapping the Development of Ancient Water Management in the Near East	ancient water management; archaeology; CORONA imagery; photogrammetry; image interpretation; Syria; Iraq	We present a novel approach that uses remote sensing to record and reconstruct traces of ancient water management throughout the whole region of Northern Mesopotamia, an area where modern agriculture and warfare has had a severe impact on the survival of archaeological remains and their visibility in modern satellite imagery. However, analysis and interpretation of declassified stereoscopic spy s…	[Rayne, Louise] Univ Leicester, Sch Archaeol & Ancient Hist, Leicester LE1 7RH, Leics, England; [Donoghue, Daniel] Univ Durham, Dept Geog, Durham DH1 3LE, England	10	10.3390/rs10122042
196	Okasha, Hagar S.; Altamimi, Mohammed F.	Modeling the Distribution of Primary Schools in Hail, Saudi Arabia, using a Geographic Information System	spatial distribution; geographical information systems; primary schools; spa-tial data; educational services	The study seeks to follow the optimal method for distributing primary schools in the City of Hail, Saudi Arabia, to improve the educational level in the city. The educational level depends on the availability of educational services and optimal spatial locating, which is deemed a key indicator to measure spatial development in any region. The study achieves this purpose by providing a factual cad…	[Okasha, Hagar S.; Altamimi, Mohammed F.] Hail Univ, Dept Social Sci Dept, Coll Art, Hail 55211, Saudi Arabia	1	10.6688/JISE.202111_37(6).0002
197	Bin Abdulwahed, Abdullah; Dash, Jadunandan; Roberts, Gareth	An evaluation of satellite dust-detection algorithms in the Middle East region		In the last 15 years, the frequency, spatial extent, and intensity of dust storms have increased and it is one of the main continuously occurring environmental hazard in the Middle East region. Since dust storms generally cover a large spatial extent and are highly dynamic, satellite Earth Observation (EO) is a key tool for detecting their occurrence, identifying their origin, and monitoring thei…	[Bin Abdulwahed, Abdullah; Dash, Jadunandan; Roberts, Gareth] Univ Southampton, Geog & Environm, Southampton, Hants, England	11	10.1080/01431161.2018.1524589
198	Lech, Pawel; Zakrzewski, Piotr	Depopulation and devastation: using GIS for tracing changes in the archaeological landscape of Kharaib al-Dasht, a Late Islamic fishing village (Kuwait)	archaeology; GIS; heritage; Kharaib al-Dasht; Late Islamic period; UAV	This article presents a case study of the remains of Kharaib al-Dasht (Kuwait), a Late Islamic fishing village. Collaboration between archaeologists from Kuwait and Poland of the Kuwaiti-Polish Archaeological Mission led to a long-term research project of this archaeological site. In this contribution we are presenting the results of a geographic information system (GIS)-structured survey. Differ…	[Lech, Pawel; Zakrzewski, Piotr] Univ Warsaw, Polish Ctr Mediterranean Archaeol, Nowy Swiat 4, PL-00497 Warsaw, Poland	5	10.1002/arp.1790
199	Zelt, Ole; Krueger, Christine; Blohm, Marina; Bohm, Soenke; Far, Shahrazad	Long-Term Electricity Scenarios for the MENA Region: Assessing the Preferences of Local Stakeholders Using Multi-Criteria Analyses	MENA; electricity scenarios; MCA; multi-criteria; stakeholder participation; sustainability; Tunisia; Morocco; Jordan; energy modelling	In recent years, most countries in the Middle East and North Africa (MENA), including Jordan, Morocco and Tunisia, have rolled out national policies with the goal of decarbonising their economies. Energy policy goals in these countries have been characterised by expanding the deployment of renewable energy technologies in the electricity mix in the medium term (i.e., until 2030). This tacitly sig…	[Zelt, Ole; Krueger, Christine] Wuppertal Inst Climate Environm & Energy, Div Future Energy & Ind Syst, D-42103 Wuppertal, Germany; [Blohm, Marina] Europa Univ Flensburg, Ctr Sustainable Energy Syst, D-24937 Flensburg, Germany; [Bohm, Soenke] Christian Albrechts Univ Kiel, Inst Geosci, D-24118 Kiel, Germany; [Far, Shahrazad] Univ Bonn, Ctr Dev Res ZEF, D-53113 Bonn, Germany	9	10.3390/en12163046
200	Albarakat, Reyadh; Lakshmi, Venkat; Tucker, Compton J.	Using Satellite Remote Sensing to Study the Impact of Climate and Anthropogenic Changes in the Mesopotamian Marshlands, Iraq	AVHRR; NDVI; Mesopotamia; land use; land cover; Iraq; environmental changes	The Iraqi Marshes in Southern Iraq are considered one of the most important wetlands in the world. From 1982 to the present, their area has varied between 10,500 km(2) and 20,000 km(2). The marshes support a variety of plants, such as reeds and papyrus, and are home to many species of birds. These marshes are Al-Hammar, Central or Al-Amarah, and Al-Huwaiza. Freshwater supplies to the marshes come…	[Albarakat, Reyadh; Lakshmi, Venkat] Univ South Carolina, Sch Earth Ocean & Environm, Columbia, SC 29208 USA; [Tucker, Compton J.] NASA, Goddard Space Flight Ctr, Greenbelt, MD 20771 USA	16	10.3390/rs10101524
201	Hussein, Khalid A.; Alsumaiti, Tareefa S.; Ghebreyesus, Dawit T.; Sharif, Hatim O.; Abdalati, Waleed	High-Resolution Spatiotemporal Trend Analysis of Precipitation Using Satellite-Based Products over the United Arab Emirates	remote sensing; climate; precipitation frequency; precipitation trends; UAE; IMERG; CMORPH; PERSIANN	Current water demands are adequately satisfied in the United Arab Emirates (UAE) with the available water resources. However, the changing climate and growing water demand pose a great challenge for water resources managers in the country. Hence, there is a great need for management strategies and policies to use the most accurate information regarding water availability. Understanding the freque…	[Hussein, Khalid A.; Alsumaiti, Tareefa S.] United Arab Emirates Univ, Coll Humanities & Social Sci, Geog & Urban Sustainabil Dept, POB 15551, Al Ain, U Arab Emirates; [Hussein, Khalid A.; Abdalati, Waleed] Univ Colorado, Cooperat Inst Res Environm Sci CIRES, Boulder, CO 80309 USA; [Ghebreyesus, Dawit T.; Sharif, Hatim O.] Univ Texas San Antonio, Coll Engn, Dept Civil & Environm Engn, San Antonio…	6	10.3390/w13172376
202	Howari, Fares M.; Sharma, Manish; Nazzal, Yousef; El-Keblawy, Ali; Mir, Shajrat; Xavier, Cijo M.; Ben Salem, Imen; Al-Taani, Ahmed A.; Alaydaroos, Fatima	Changes in the Invasion Rate of Prosopis juliflora and Its Impact on Depletion of Groundwater in the Northern Part of the United Arab Emirates	evapotranspiration; groundwater; invasive alien species; Prosopis invasion; remote sensing	Prosopis species were introduced to the United Arab Emirates (UAE) region for desert greening. However, the species now pose a great threat to the native plant diversity. This study used high-resolution satellite imagery (1990-2019) to understand the history and current distribution of Prosopis species and their impact on fresh groundwater. The results show that the Prosopis invasion in the study…	[Howari, Fares M.; Sharma, Manish; Nazzal, Yousef; Mir, Shajrat; Xavier, Cijo M.; Ben Salem, Imen; Al-Taani, Ahmed A.] Zayed Univ, Coll Nat & Hlth Sci, POB 144534, Abu Dhabi, U Arab Emirates; [El-Keblawy, Ali] Univ Sharjah, Coll Sci, Dept Appl Biol, POB 27272, Sharjah, U Arab Emirates; [Alaydaroos, Fatima] UAE Space Agcy, POB 7133, Abu Dhabi, U Arab Emirates	1	10.3390/plants11050682
203	Alsharif, Mohammad; Alzandi, Abdulrhman Ali; Shrahily, Raid; Mobarak, Babikir	Land Use Land Cover Change Analysis for Urban Growth Prediction Using Landsat Satellite Data and Markov Chain Model for Al Baha Region Saudi Arabia	Land Use Land Cover Change; urban growth; Landsat; GIS; Markov cellular automata; planning and management; Saudi Arabia	Land Use Land Cover Change (LULCC) and urban growth prediction and analysis are two of the best methods that can help decision-makers for better sustainable management and planning of socioeconomic development in the countries. In the present paper, the growth of urban land use was analyzed and predicted in all districts of the El Baha region (Kingdom of Saudi Arabia) based on high-resolution Lan…	[Alsharif, Mohammad; Shrahily, Raid] Al Baha Univ, Coll Engn, Dept Architecture, Prince Mohammad Bin Saud Rd, Al Baha 65527, Saudi Arabia; [Alzandi, Abdulrhman Ali] Al Baha Univ, Fac Arts & Sci Qilwah, Biol Dept, Qilwah 65779, Saudi Arabia; [Mobarak, Babikir] Al Baha Univ, Coll Engn, Dept Civil Engn, Prince Mohammad Bin Saud Rd, Al Baha 65527, Saudi Arabia	2	10.3390/f13101530
204	Bahrawi, Jarbou; Ewea, Hatem; Kamis, Ahmed; Elhag, Mohamed	Potential flood risk due to urbanization expansion in arid environments, Saudi Arabia	Classification; Peak flow; Remote sensing; Temporal analysis; Watershed management	Urbanization of watersheds is known to increase the flood risk potentials. Since 1970, eastern Jeddah, Saudi Arabia, underwent rapid urbanization due to the high rate of population growth and the booming economy, which attracts hundreds of thousands of expatriates. Such urbanizations change drastically the flood characteristics and enhance the risk from such watersheds as shown in 2009 and 2011 s…	[Bahrawi, Jarbou; Ewea, Hatem; Kamis, Ahmed; Elhag, Mohamed] King Abdulaziz Univ, Fac Meteorol Environm & Arid Land Agr, Dept Hydrol & Water Resources Management, Jeddah 21589, Saudi Arabia; [Elhag, Mohamed] German Univ Technol Oman, Fac Sci, Dept Appl Geosci, Muscat 1816, Oman	15	10.1007/s11069-020-04190-7
205	Mohammadi-Behzad, H. R.; Charchi, A.; Kalantari, N.; Nejad, A. Mehrabi; Vardanjani, H. Karimi	Delineation of groundwater potential zones using remote sensing (RS), geographical information system (GIS) and analytic hierarchy process (AHP) techniques: a case study in the Leylia-Keynow watershed, southwest of Iran	Groundwater potential zone map; Remote sensing; GIS; AHP; Leylia-Keynow watershed	In this research, a standard methodology has been applied to delineate groundwater resource potential zonation based on integrated remote sensing (RS), geographic information system (GIS), and analytical hierarchy process (AHP) techniques in Leylia-Keynow watershed, southwest of Iran. A total of five sets of criteria/factors (including lineament density, rainfall, lithology, slope, and drainage d…	[Mohammadi-Behzad, H. R.; Charchi, A.; Kalantari, N.; Nejad, A. Mehrabi; Vardanjani, H. Karimi] Shahid Chamran Univ Ahvaz, Dept Geol, Fac Earth Sci, Ahvaz, Iran	35	10.1007/s13146-018-0420-7
206	Hereher, Mohamed E.	Assessment of Infrastructure Vulnerability to Tsunamis upon the Coastal Zone of Oman Using GIS	GDEM; Oman; infrastructure; flooding	The coastal zones of Oman are frequently exposed to tropical cyclones and are expected to be overwhelmed by tsunami waves that originate from marine earthquakes in the Indian Ocean. Inundation of low-lying coastal lands is, hence, inevitable. This study aims to provide a spatial database of the major infrastructure of Oman in relation to their vulnerability to the sea-level rise by tsunamis. This…	[Hereher, Mohamed E.] Sultan Qaboos Univ, Coll Arts & Social Sci, Geog Dept, Muscat 123, Oman; [Hereher, Mohamed E.] Damietta Univ, Fac Sci, Dept Environm Sci, New Damietta 34517, Egypt	4	10.3390/geosciences10050175
207	Alotaibi, Abdullah A.; Maerz, Norbert H.; Boyko, Kenneth J.; Youssef, Ahmed M.; Pradhan, Biswajeet	Temporal LiDAR scanning in quantifying cumulative rockfall volume and hazard assessment: A case study at southwestern Saudi Arabia q	LiDAR; Laser scanning; Rockfall; Remote sensing; GIS; KSA	Rockfalls and unstable slopes pose a serious threat to people and property along roads/highways in the southwestern mountainous regions of Saudi Arabia. In this study, the application of terrestrial light detection and ranging (LiDAR) technology was applied aiming to propose a strategy to analyze and accu-rately depict the detection of rockfall changes, calculation of rockfall volume, and evaluat…	[Alotaibi, Abdullah A.; Youssef, Ahmed M.] Saudi Geol Survey, Geol Hazards Dept, POB 54141, Jeddah 21514, Saudi Arabia; [Maerz, Norbert H.; Boyko, Kenneth J.] Missouri Univ Sci & Technol, Geol Engn, 1006 Kingshighway, Rolla, MO 65409 USA; [Youssef, Ahmed M.] Sohag Univ, Fac Sci, Geol Dept, Sohag 82524, Egypt; [Pradhan, Biswajeet] Univ Technol Sydney, Ctr Adv Modelling & Geospatial Informat Syst C…	0	10.1016/j.ejrs.2022.03.010
208	Megahed, Hanaa A.	Hydrological and archaeological studies to detect the deterioration of Edfu temple in Upper Egypt due to environmental changes during the last five decades	Deterioration; Hydrological studies; Archaeology; Remote sensing; GIS; Edfu; Egypt	Archaeological sites in Upper Egypt, especially Edfu Temple, are considered a wealth of human civilization and are irreplaceable. Deterioration of archaeological sites due to environmental changes in Edfu city include disintegration and exfoliation of stones, dissolution of building materials, loss of moral paintings, crystallization of salts in walls and columns, stone bleeding, destruction of w…	[Megahed, Hanaa A.] Natl Author Remote Sensing & Space Sci NARSS, Dept Geol, Cairo 1564, Egypt	1	10.1007/s42452-020-03560-x
209	Bou-imajjane, Latifa; Belfoul, Mhamed Alaeddine; Elkadiri, Racha; Stokes, Martin	Soil erosion assessment in a semi-arid environment: a case study from the Argana Corridor, Morocco	Soil erosion; RUSLE; Remote sensing; GIS; Argana Corridor; Western High Atlas; Morocco	Soil erosion is a widespread problem that continues to expand in magnitude and scope due to ever-changing anthropogenic and climatic conditions. The High Atlas Mountains in Morocco are a typical case where this problem affects the ecological and socioeconomic activities of the region. The main objective of this study is to provide an erosion risk analysis of the Argana Corridor in the High Atlas …	[Bou-imajjane, Latifa; Belfoul, Mhamed Alaeddine] Ibn Zohr Univ, Fac Sci Agadir, Geol Dept, Agadir, Morocco; [Elkadiri, Racha] Middle Tennessee State Univ, Geosci Dept, Murfreesboro, TN 37130 USA; [Stokes, Martin] Plymouth Univ, Sch Geog Earth & Environm Sci, Plymouth, Devon, England	9	10.1007/s12665-020-09127-8
210	Lasaponara, Rosa; Masini, Nicola	Space-Based Identification of Archaeological Illegal Excavations and a New Automatic Method for Looting Feature Extraction in Desert Areas	Satellite remote sensing; Review; Archaeological looting; Automatic feature extraction; Peru; Syria	The identification and quantification of disturbance of archaeological sites has been generally approached by visual inspection of optical aerial or satellite pictures. In this paper, we briefly summarize the state of the art of the traditionally satellite-based approaches for looting identification and propose a new automatic method for archaeological looting feature extraction approach (ALFEA).…	[Lasaponara, Rosa] CNR, CNR IMAA Inst Inst Methodol Environm Anal, I-85050 C Da S Loya, Tito Scalo, Italy; [Masini, Nicola] CNR, CNR IBAM Inst Archaeol & Monumental Heritage, I-85050 C Da S Loya, Tito Scalo, Italy	23	10.1007/s10712-018-9480-4
211	Mujabar, P. Sheik; Dajkumar, S.	Mapping of bauxite mineral deposits in the northern region of Saudi Arabia by using Advanced Spaceborne Thermal Emission and Reflection Radiometer satellite data	Mineralogy; geology; remote sensing; Saudi Arabia	Mineral deposit mapping is very essential for sustainable and eco-friendly exploitation of natural resources. The Kingdom of Saudi Arabia has abundant natural resources such as natural gas, oil and minerals. It reserves high quantity of minerals such as phosphates, bauxites, copper, gold and other industrial minerals. The red soil regions located in Hail and Qassim provinces of Saudi Arabia have …	[Mujabar, P. Sheik] Jubail Ind Coll, Dept Gen Studies, Jubail Ind City, Saudi Arabia; [Dajkumar, S.] Explorat Geosci, Perth, WA, Australia	6	10.1080/10095020.2018.1530857
212	Mallick, Javed; Khan, Roohul Abad; Ahmed, Mohd; Alqadhi, Saeed Dhafer; Alsubih, Majed; Falqi, Ibrahim; Hasan, Mohd Abul	Modeling Groundwater Potential Zone in a Semi-Arid Region of Aseer Using Fuzzy-AHP and Geoinformation Techniques	groundwater potential; fuzzy-AHP; multi-criteria decision making; semi-arid; Saudi Arabia	Saudi Arabia's arid and semi-arid regions suffer from water scarcity because of climatic constraints and rapid growth of domestic and industrial water uses. The growing demand for high-quality water supplies and to reduce the dependency on desalination creates an urgent need to explore groundwater resources as an alternative. The weighted overlay analysis method using the fuzzy-analytical hierarc…	[Mallick, Javed; Ahmed, Mohd; Alqadhi, Saeed Dhafer; Alsubih, Majed; Falqi, Ibrahim; Hasan, Mohd Abul] King Khalid Univ, Dept Civil Engn, Coll Engn, Abha 61411, Saudi Arabia; [Khan, Roohul Abad] Himalayan Univ, Fac Engn & Appl Sci, Dept Civil Engn, Itanagar 791111, Arunachal Prade, India	64	10.3390/w11122656
213	Sepasgozar, Samad M. E.; Karimi, Reyhaneh; Shirowzhan, Sara; Mojtahedi, Mohammad; Ebrahimzadeh, Sabbar; McCarthy, David	Delay Causes and Emerging Digital Tools: A Novel Model of Delay Analysis, Including Integrated Project Delivery and PMBOK	delay; time overruns; cost overruns; scheduling; PMBOK construction extension; PMI scheduling standards; Microsoft projects; primavera; BIM; GIS; risk analysis; IPD	Delay is one of the main challenges of construction projects, and there is still much to overcome in order to reach near zero delay in all construction projects. This project aims to conduct a systematic critical review including a bibliography analysis on delay literature in construction. The main questions consider what has been learnt from a decade investigating delay causes and effects in the…	[Sepasgozar, Samad M. E.; Shirowzhan, Sara; Mojtahedi, Mohammad] Univ New South Wales, Fac Built Environm, Sydney, NSW 2052, Australia; [Karimi, Reyhaneh] Univ Sci & Culture, Dept Art & Architecture, Tehran 1461968151, Iran; [Ebrahimzadeh, Sabbar] Quaemshahr Azad Univ, Dept Law, Qaemshahr 4765161964, Iran; [McCarthy, David] KPMG Major Projects Advisory, Sydney, NSW 2000, Australia	34	10.3390/buildings9090191
214	Selim, El Sayed; Aboelkhair, Hatem; Aboezz, Eid R.	Mapping and assessing limestone as a raw material for the cement industry using satellite data: a case study of areas between Riyadh and Al Kharj, Saudi Arabia	Limestone; Raw material; Cement industry; ASTER; Carbonate index; Saudi Arabia	Satellite remote sensing is a popular method utilized in mineral and natural resource exploration, particularly to reduce reconnaissance and exploration costs. Its use is widely popular for geological mapping of arid regions. The primary objective of this paper is to illustrate how remote sensing satellite data could be used for mapping and assessing potential limestone raw material for the cemen…	[Selim, El Sayed; Aboezz, Eid R.] Prince Sattam Bin Abdulaziz Univ, Coll Sci & Humanities Al Kharj, Dept Phys, Al Kharj 11942, Saudi Arabia; [Selim, El Sayed; Aboelkhair, Hatem] Damietta Univ, Geol Dept, Fac Sci, New Damietta, Egypt; [Aboelkhair, Hatem] Damietta Univ, Ctr Space Res & Applicat CSRA, New Damietta, Egypt; [Aboezz, Eid R.] Cairo Univ, Geophys Dept, Fac Sci, Giza, Egypt	0	10.1007/s12517-020-05865-y
215	Rayne, Louise; Gatto, Maria Carmela; Abdulaati, Lamin; Al-Haddad, Muftah; Sterry, Martin; Sheldrick, Nichole; Mattingly, David	Detecting Change at Archaeological Sites in North Africa Using Open-Source Satellite Imagery	archaeology; change detection; North Africa; Libya; Egypt; Google Earth Engine	Our paper presents a remote sensing workflow for identifying modern activities that threaten archaeological sites, developed as part of the work of the Endangered Archaeology of the Middle East and North Africa (EAMENA) project. We use open-source Sentinel-2 satellite imagery and the free tool Google Earth Engine to run a per-pixel change detection to make the methods and data as accessible as po…	[Rayne, Louise] Newcastle Univ, Sch Hist Class & Archaeol, Newcastle Upon Tyne NE1 7RU, Tyne & Wear, England; [Gatto, Maria Carmela; Sterry, Martin; Sheldrick, Nichole; Mattingly, David] Univ Leicester, Sch Archaeol & Ancient Hist, Leicester LE1 7RH, Leics, England; [Abdulaati, Lamin] Dept Antiqu, Hun, Libya; [Al-Haddad, Muftah] Az Zaytuna Univ, Tarhuna, Libya	19	10.3390/rs12223694
216	Farah, Abdelouhed; Algouti, Ahmed; Algouti, Abdellah; Mlouk, Mohammed Ait; Ifkirne, Mohammed	Lineament mapping in the Central High Atlas using ASTER and ASTER-GDEM data, (Morocco)	Central High Atlas; Morocco; structural lineaments; remote sensing; ASTER; ASTER GDEM; GIS; automatic lineament extraction	The present work focuses on lineament mapping using new spatial remote sensing techniques in the central High Atlas (CHA) of Morocco. In this study, the automatic extraction of lineaments was based on using multispectral images type Advanced Spaceborne Thermal Emission Reflection Radiometer (ASTER, L1B) with high spatial resolution up to 15 m for the visible/near-infrared (VNIR) bands. Besides, a…	[Farah, Abdelouhed; Algouti, Ahmed; Algouti, Abdellah; Mlouk, Mohammed Ait; Ifkirne, Mohammed] Univ Cadi Ayyad, Fac Sci Semlaiia, Dept Geol, Grosci Geotomism Nat Hazards & Remote Sensing Lab, BP 2390, Marrakech 40000, Morocco	0	10.18268/BSGM2022v74n1a091121
217	Morgan, Hesham; Hussien, Hussien M.; Madani, Ahmed; Nassar, Tamer	Delineating Groundwater Potential Zones in Hyper-Arid Regions Using the Applications of Remote Sensing and GIS Modeling in the Eastern Desert, Egypt	remote sensing; weighted overlay model; analytical hierarchical process (ahp); thematic layers; climate change	The increasing demand for freshwater supplies and the effects of climate change in arid and hyper-arid regions are pushing governments to explore new water resources for food security assurance. Groundwater is one of the most valuable water resources in these regions, which are facing water scarcity due to climatic conditions and limited rainfall. In this manuscript, we provide an integrated appr…	[Morgan, Hesham; Madani, Ahmed; Nassar, Tamer] Cairo Univ, Fac Sci, Dept Geol, Giza 12613, Egypt; [Hussien, Hussien M.] Desert Res Ctr, Geol Dept, Cairo 11753, Egypt	2	10.3390/su142416942
218	Hamzeh, Nasim Hossein; Karami, Sara; Kaskaoutis, Dimitris G.; Tegen, Ina; Moradi, Mohamad; Opp, Christian	Atmospheric Dynamics and Numerical Simulations of Six Frontal Dust Storms in the Middle East Region	frontal dust storm; numerical prediction models; synoptic meteorology; AOD; MODIS; Middle East	This study analyzes six frontal dust storms in the Middle East during the cold period (October-March), aiming to examine the atmospheric circulation patterns and force dynamics that triggered the fronts and the associated (pre- or post-frontal) dust storms. Cold troughs mostly located over Turkey, Syria and north Iraq played a major role in the front propagation at the surface, while cyclonic con…	[Hamzeh, Nasim Hossein; Karami, Sara; Moradi, Mohamad] Atmospher Sci & Meteorol Res Ctr ASMERC, Tehran 1497716385, Iran; [Kaskaoutis, Dimitris G.] Natl Observ Athens, Inst Environm Res & Sustainable Dev, Athens 15236, Greece; [Kaskaoutis, Dimitris G.] Univ Crete, Dept Chem, Environm Chem Proc Lab, Iraklion 71003, Greece; [Tegen, Ina] Leibniz Inst Tropospher Res TROPOS, D-04318 Leipzig, Germany; […	23	10.3390/atmos12010125
219	Alsumaiti, Tareefa S.; Hussein, Khalid; Ghebreyesus, Dawit T.; Sharif, Hatim O.	Performance of the CMORPH and GPM IMERG Products over the United Arab Emirates	United Arab Emirates; precipitation; CMORPH; GPM	Satellite-based precipitation products are becoming available at very high temporal and spatial resolutions, which has accelerated their use in various hydro-meteorological and hydro-climatological applications. Because the quantitative accuracy of such products is affected by numerous factors related to atmospheric and terrain properties, validating them over different regions and environments i…	[Alsumaiti, Tareefa S.; Hussein, Khalid] United Arab Emirates Univ, Coll Humanities & Social Sci, Geog & Urban Sustainabil Dept, POB 15551, Al Ain, U Arab Emirates; [Hussein, Khalid] Univ Colorado, Cooperat Inst Res Environm Sci CIRES, Boulder, CO 80309 USA; [Ghebreyesus, Dawit T.; Sharif, Hatim O.] Univ Texas & San Antonio, Dept Civil & Environm Engn, San Antonio, TX 78249 USA	22	10.3390/rs12091426
220	Bostanci, Hasan Tahsin; Alemdag, Selcuk; Gurocak, Zulfu; Gokceoglu, Candan	Combination of discontinuity characteristics and GIS for regional assessment of natural rock slopes in a mountainous area (NE Turkey)	GIS; Instability map; Kinematic analysis; Rock slope stability	Geographical Information Systems (GIS) have a very large spectrum of users. As in many engineering applications, GIS are frequently used in geotechnical projects, especially in producing various thematic and zoning maps such as various susceptibility and hazard maps. Instability maps for large areas with similar characteristic can be produced in a practical way by evaluating the results obtained …	[Bostanci, Hasan Tahsin] Gumushane Univ, Dept Geomat Engn, TR-29000 Gumushane, Turkey; [Alemdag, Selcuk] Gumushane Univ, Dept Geol Engn, TR-29000 Gumushane, Turkey; [Gurocak, Zulfu] Firat Univ, Dept Geol Engn, TR-23119 Elazig, Turkey; [Gokceoglu, Candan] Hacettepe Univ, Dept Geol Engn, TR-06800 Ankara, Turkey	9	10.1016/j.catena.2018.03.005
221	Chau, Khang; Franklin, Meredith; Lee, Huikyo; Garay, Michael; Kalashnikova, Olga	Temporal and Spatial Autocorrelation as Determinants of Regional AOD-PM2.5 Model Performance in the Middle East	aerosol optical depth; particulate matter; autocorrelation; machine learning	Exposure to fine particulate matter (PM2.5) air pollution has been shown in numerous studies to be associated with detrimental health effects. However, the ability to conduct epidemiological assessments can be limited due to challenges in generating reliable PM2.5 estimates, particularly in parts of the world such as the Middle East where measurements are scarce and extreme meteorological events …	[Chau, Khang; Franklin, Meredith] Univ Southern Calif, Keck Sch Med, Los Angeles, CA 90032 USA; [Lee, Huikyo; Garay, Michael; Kalashnikova, Olga] NASA, Jet Prop Lab, Pasadena, CA 91109 USA	2	10.3390/rs13183790
222	Ashkezari, Atefeh Dehghani; Hosseinzadeh, Nasser; Chebli, Ayoub; Albadi, Mahammed	Development of an enterprise Geographic Information System (GIS) integrated with smart grid	Geographic Information System (GIS); Smart grid; Enterprise system; Renewable energy sources; On-line monitoring and control	This article uses a Geographical Information System (GIS) platform to create an on-line monitoring system in order to display real-time operational data measured at different points of an electricity network. The network with all its assets will be displayed on a geographical map. This provides the electricity utilities with a tool for monitoring, control, asset management, and demand side manage…	[Ashkezari, Atefeh Dehghani; Hosseinzadeh, Nasser; Albadi, Mahammed] Sultan Qaboos Univ, Dept Elect & Comp Engn, Muscat, Oman; [Chebli, Ayoub] Khatib & Alami & Partners CEC, Energy & Util Dept, Muscat, Oman	18	10.1016/j.segan.2018.02.001
223	Aal, Ahmed K. Abd El; Kamel, Mostafa; Alyami, Saleh H.	Environmental Analysis of Land Use and Land Change of Najran City: GIS and Remote Sensing	LULC; Remote sensing GIS; Sustainability development	This study critically analyzes changes in land use and land cover by means of multi-temporal remote sensing of Najran City in Saudi Arabia between 1975 and 2019. A number of remotely sensed data were employed to create multi-maps using: (a) the normalized difference vegetation index; (b) head-up digitizing; and (c) supervised classification of Landsat images using field observation and accuracy a…	[Aal, Ahmed K. Abd El; Alyami, Saleh H.] Najran Univ, Fac Engn, Civil Engn Dept, Najran, Saudi Arabia; [Aal, Ahmed K. Abd El; Kamel, Mostafa] Al Azhar Univ, Fac Sci, Geol Dept, Assiut Branch, Assiut, Egypt	8	10.1007/s13369-020-04884-x
224	Liaqat, Muhammad Usman; Mohamed, Mohamed Mostafa; Chowdhury, Rezaul; Elmahdy, Samy Ismail; Khan, Qasim; Ansari, Rubina	Impact of land use/land cover changes on groundwater resources in Al Ain region of the United Arab Emirates using remote sensing and GIS techniques	Al Ain; Land use land cover change; Remote sensing; Groundwater mapping	Urbanisation causes land degradation problems, including an increased pressure on natural resources and management of water resources. This study aims to investigate the impact of the spatio-temporal dynamics of land use land cover (LULC) changes on groundwater table in the region of Al Ain, United Arab Emirates (UAE), from 2006 to 2016. The Landsat images, Landsat ETM for 2006 and Landsat 8 for …	[Liaqat, Muhammad Usman] Univ Brescia, Dept Civil Environm & Architectural Engn, Brescia, Italy; [Mohamed, Mohamed Mostafa; Khan, Qasim] United Arab Emirates Univ, Dept Civil & Environm Engn, POB 15551, Al Ain, U Arab Emirates; [Mohamed, Mohamed Mostafa] United Arab Emirates Univ, Natl Water Ctr, POB 15551, Al Ain, U Arab Emirates; [Chowdhury, Rezaul] Univ Southern Queensland, Sch Civil Engn & Su…	11	10.1016/j.gsd.2021.100587
225	Najafpour, Nategheh; Afshin, Hossein; Firoozabadi, Bahar	The 20-22 February 2016 Mineral Dust Event in Tehran, Iran: Numerical Modeling, Remote Sensing, and In Situ Measurements	numerical modeling; MODIS; dust event; Tehran; planetary boundary layer; radiative forcing	Wind erosion raises mineral dusts from dry and semidry lands and produces dust storms. Such dust masses have created numerous health and economic problems for the residents of southern, southwestern, and central parts of Iran. The main sources, movement, spread, and settlement of dust masses can be determined by solving the governing equations for aerosol transmission. Such information will be ce…	[Najafpour, Nategheh; Afshin, Hossein; Firoozabadi, Bahar] Sharif Univ Technol, Sch Mech Engn, Ctr Excellence Energy Convers, Tehran, Iran	8	10.1029/2017JD027593
226	Ayyad, Saher; Al Zayed, Islam S.; Van Tran Thi Ha; Ribbe, Lars	The Performance of Satellite-Based Actual Evapotranspiration Products and the Assessment of Irrigation Efficiency in Egypt	actual evapotranspiration; remote sensing; relative water supply; normalized difference vegetation index; land cover; Nile Delta and Nile Valley	Monitoring of crop water consumption, also known as actual evapotranspiration (ETa), is crucial for the prudent use of limited freshwater resources. Remote-sensing-based algorithms have become a popular approach for providing spatio-temporal information on ETa. Satellite-based ETa products are widely available. However, identifying an adequate product remains a challenge due to validation data sc…	[Ayyad, Saher; Van Tran Thi Ha; Ribbe, Lars] Cologne Univ Appl Sci, Inst Technol & Resources Management Trop & Subtro, D-50679 Cologne, Germany; [Al Zayed, Islam S.] NWRC, Cairo 13411, Egypt; [Van Tran Thi Ha] Tech Univ Dortmund, Dept Spatial Informat Management & Modelling RIM, D-44227 Dortmund, Germany	15	10.3390/w11091913
227	Daniali, Mohamad; Karimi, Neamat	Spatiotemporal analysis of dust patterns over Mesopotamia and their impact on Khuzestan province, Iran	AOD; Dust; AERONET; MODIS; Ahvaz; Mesopotamia	Dust storms are yet quite frequent in various parts of the world, particularly ancient Mesopotamia (approximately corresponding to most parts of Iraq as well as certain surrounding regions toward its north). To add to the ongoing difficulty, monitoring dust patterns has been proven to be a rather difficult endeavor given the absence of reliable ground-based monitoring stations in the correspondin…	[Daniali, Mohamad] Qom Univ Technol, Environm Engn, Qom, Iran; [Karimi, Neamat] Water Res Inst, Water Resources Res Dept, Tehran, Iran	10	10.1007/s11069-019-03641-0
228	Nafia, El-Alaouy; Sebbar, Badreddine; Bouras, El Houssaine; Moumni, Aicha; Laftouhi, Nour-Eddine; Lahrouni, Abderrahman	Hydraulic Modeling and Remote Sensing Monitoring of Floodhazard in Arid Environments-A Case Study of Laayoune City in Saquia El Hamra Watershed Southern Morocco	flash flood; hydraulic modeling; remote sensing; Saquia El Hamra; Southern Morocco; semi-arid	Morocco often faces significant intense rainfall periods that can generate flash floods and raging torrents, causing serious damage in a very short period of time. This study aims to monitor wetland areas after a flash-flood event in an arid region, Saquia El hamra Saharan of Morocco, using a technique that combines hydraulic modeling and remote sensing technology, namely satellite images. The hy…	[Nafia, El-Alaouy; Moumni, Aicha; Laftouhi, Nour-Eddine; Lahrouni, Abderrahman] Cadi Ayyad Univ, Fac Sci Semlalia, Marrakech 40000, Morocco; [Sebbar, Badreddine] Mohammed VI Polytech Univ, Ctr Remote Sensing Applicat, Benguerir 43150, Morocco; [Sebbar, Badreddine] Univ Toulouse, Ctr Etud Spatiales Biosphere CESBIO, UPS, CNRS,IRD,CNES, F-31400 Toulouse, France; [Bouras, El Houssaine] Lund Univ, De…	0	10.3390/w14213582
229	Altuwaijri, Hamad Ahmed	Morphometric network drainage analysis for railway location: case study of Saudi Railway Company's project	Saudi Railway Company (SAR); Remote sensing; Urban growth; Morphometric analysis	To determine the suitability of a railway line's location, morphometric network drainage analysis and a high-resolution digital elevation model (10 m) were used. This study was performed using the geoprocessing techniques of GIS. The extracted drainage network was classified according to the Strahler's system of classification to study the suitability of railway tracks' location via the project o…	[Altuwaijri, Hamad Ahmed] King Saud Univ, Dept Geog, Arriyadh 11692, Saudi Arabia	2	10.1007/s12517-019-4633-4
230	Almasad, Abdullah; Pavlak, Gregory; Alquthami, Thamer; Kumara, Soundar	Site suitability analysis for implementing solar PV power plants using GIS and fuzzy MCDM based approach	Geographical Information Systems; Multi-Criteria Decision Making; Fuzzy Analytical Hierarchy Process; Site Suitability Analysis	Although Saudi Arabia can benefit from implementing photovoltaic (PV) solar power projects to generate power, there are some environmental, economic and technical challenges which can affect the efficiency and cost effectiveness of these facilities. The goal of this paper is to build a site suitability model to identify the suitable sites for implementing solar PV solar projects in Saudi Arabia. …	[Almasad, Abdullah] King Saud Univ, Coll Engn, Dept Ind Engn, Riyadh, Saudi Arabia; [Pavlak, Gregory] Penn State Univ, Dept Architectural Engn, University Pk, PA USA; [Alquthami, Thamer] King Abdulaziz Univ, Dept Elect Engn & Comp Engn, Jeddah, Saudi Arabia; [Kumara, Soundar] Penn State Univ, Dept Ind Engn, University Pk, PA USA	0	10.1016/j.solener.2022.11.046
231	Panahipour, Mitra	Land Use and Environment in a Zone of Uncertainty: A Case of the Sasanian Expansion in Eastern Iraq - Western Iran	Settlement and land use; satellite remote sensing; mobile-sedentary interactions; microenvironment; Sasanian empire	This paper explores diverse patterns of settlement and land use across an environmentally transitional area in eastern Iraq and western Iran during the Sasanian period. Historical and modern high-resolution satellite images in conjunction with field surveys are employed to document archaeological features. Analysis of multispectral satellite imagery creates a historical and traditional land use m…	[Panahipour, Mitra] NYU, Inst Study Ancient World, New York, NY USA; [Panahipour, Mitra] Univ Arkansas, Dept Anthropol, Old Main 330, Fayetteville, AR 72701 USA	4	10.1080/05786967.2019.1657781
232	Kalarikkal, Remya Kottarathu; Kim, Youngwook; Ksiksi, Taoufik	Incorporating satellite remote sensing for improving potential habitat simulation of Prosopis cineraria (L.) Druce in United Arab Emirates	Habitat suitability; Remote sensing; SDM; MaxEnt; NDVI; Prosopis cineraria; Ghaf tree; UAE	Predicting the suitable habitat of a species is one of the adequate and enhancing approach in biodiversity conservation planning and implementation. Species habitat distribution is closely linked with environmental factors and bioclimatic variables used as prediction variables in species distribution models (SDMs). Recent application of satellite remote sensing data and the bioclimatic variables …	[Kalarikkal, Remya Kottarathu; Kim, Youngwook; Ksiksi, Taoufik] United Arab Emirates Univ, Coll Sci, Dept Biol, Al Ain, U Arab Emirates	1	10.1016/j.gecco.2022.e02167
233	Masoud, Ahmed M.; Quoc Bao Pham; Alezabawy, Ahmed K.; Abu El-Magd, Sherif A.	Efficiency of Geospatial Technology and Multi-Criteria Decision Analysis for Groundwater Potential Mapping in a Semi-Arid Region	groundwater potential zone; the analytic hierarchy process; frequency ratio model; GIS; Lake Nasser	The increasing water demand in Egypt causes massive stress on groundwater resources. The high variability in the groundwater depth, aquifer properties, terrain characteristics, and shortage of rainfall make it necessary to identify the groundwater potentiality in semi-arid regions. This study used the possibilities of multi-criteria decision approaches (MCDA), geographical information system (GIS…	[Masoud, Ahmed M.] Sohag Univ, Fac Sci, Geol Dept, Sohag 82524, Egypt; [Quoc Bao Pham] Univ Silesia Katowice, Fac Nat Sci, Inst Earth Sci, Bedzinska St 60, PL-41200 Sosnowiec, Poland; [Alezabawy, Ahmed K.] Helwan Univ, Fac Sci, Geol Dept, Cairo 11795, Egypt; [Abu El-Magd, Sherif A.] Suez Univ, Fac Sci, Geol Dept, Suez 43518, Egypt	7	10.3390/w14060882
234	Sardi, Sudibyo S.; Qurban, Mohammed A.; Li, Wenzhao; Kadinjappalli, Krishnakumar P.; Manikanda, P. Karuppasamy; Hariri, Mustafa M.; Tawabini, Bassam S.; Khalil, Amjad B.; El-Askary, Hesham	Assessment of areas environmentally sensitive to oil spills in the western Arabian Gulf, Saudi Arabia, for planning and undertaking an effective response	Oil spill response; Sensitivity map; Oil spill model; Arabian gulf; Remote sensing; Ecological risk assessment		[Qurban, Mohammed A.; Kadinjappalli, Krishnakumar P.; Manikanda, P. Karuppasamy] King Fahd Univ Petr & Minerals, Res Inst, Ctr Environm & Water, Dhahran 31261, Saudi Arabia; [Sardi, Sudibyo S.; Qurban, Mohammed A.; Hariri, Mustafa M.; Tawabini, Bassam S.] King Fahd Univ Petr & Minerals, Coll Petr Engn & Geosci, Dept Geosci, Dhahran 31261, Saudi Arabia; [Li, Wenzhao] Chapman Univ, Schmid Coll Sci …	10	10.1016/j.marpolbul.2019.110588
235	Abou Samra, Rasha M.; Ali, R. R.	Applying DSAS tool to detect coastal changes along Nile Delta, Egypt	Coastal areas; Nile delta; DSAS; GIS; Change detection	The coastline of the Nile Delta is a dynamic zone in Egypt that is received considerable attention. This region contains many major cities and it also contains a number of economically important harbors such as Damietta, Port Said and Alexandria. This research focuses attention on applying Geographical Information System (GIS) tool to assess prospective changes along the coast of the Nile Delta, …	[Abou Samra, Rasha M.] Damietta Univ, Dept Environm Sci, Fac Sci, POB 34517, New Damietta, Egypt; [Ali, R. R.] Natl Res Ctr NRC, Soils & Water Use Dept, Giza, Egypt	9	10.1016/j.ejrs.2020.11.002
236	Fekir, Youcef; Hamadouche, Mohammed Amine; Anteur, Djamel	Integrated approach for the assessment of forest fire risk and burn severity mapping using GIS, AHP method, and Google Earth Engine in Western Algeria	GIS; AHP; Google Earth Engine; Forest fires; dNBR; Algeria	In Algeria, more than 29% of the forest heritage is located in the western part where forest fires remain the most devastating factor. The assessment of the Forest Fire Risk (FFR) and the mapping of very vulnerable areas seem to be the most effective ways to meet this alarming situation. Remote sensing and Geographic Information System (GIS)-based multicriteria decision analysis (MCDA) methods ha…	[Fekir, Youcef; Hamadouche, Mohammed Amine] Univ Mustapha Stambouli, Route Mamounia, Mascara 29000, Algeria; [Anteur, Djamel] Univ Moulay Taher, Saida 20000, Algeria; [Fekir, Youcef] Univ Ibn Khaldoun, Fac Nat & Life Sci, Geomat & Sustainable Dev Lab, Karman 14000, Tiaret, Algeria	0	10.1007/s41207-022-00338-y
237	Branch, Oliver; Behrendt, Andreas; Gong, Zhecheng; Schwitalla, Thomas; Wulfmeyer, Volker	Convection Initiation over the Eastern Arabian Peninsula	convection initiation; remote sensing; Meteosat; brightness temperature	We investigated summer statistics of convection initiation (CI) events in the north-eastern part of the Arabian Peninsula, particular the Al Hajar Mountains of the United Arab Emirates (UAE) and Oman (54.5-59.5 degrees E longitude) with thermal radiances from the f rst generation (MFG) sensor of Meteosat-7 at 57 degrees E in the years 2010 to 2016. Previously, local precipitation radar was used f…	[Branch, Oliver; Behrendt, Andreas; Gong, Zhecheng; Schwitalla, Thomas; Wulfmeyer, Volker] Univ Hohenheim, Inst Phys & Meteorol, Garbenstr 30, D-70593 Stuttgart, Germany	15	10.1127/metz/2019/0997
238	Ahmed, Hany G., I; Saleh, Salem S.; Mohamed, Mostafa H.	A GIS model for exploring the water pumped storage locations using remote sensing data	Elevation head; GIS; MCDA; PHES; Suitability analysis	In recent decades, the energy sector in Egypt faces various challenges due to the continuous increase in energy demand. Fossil fuels may be running out, so there is an urgent need to find a sustainable energy source. Renewable energy is one of pure energy, but it needs to be stored using economical and environment-friendly means. Pumping hydroelectric storage (PHES) plants are currently one of th…	[Ahmed, Hany G., I; Mohamed, Mostafa H.] Al Azhar Univ, Fac Engn, Civil Engn Dept, Cairo, Egypt; [Saleh, Salem S.] Giza High Inst Engn & Technol, Civil Engn Dept, Cairo, Egypt	1	10.1016/j.ejrs.2021.09.0061110-9823
239	Elmahdy, Samy; Mohamed, Mohamed; Ali, Tarig	Land Use/Land Cover Changes Impact on Groundwater Level and Quality in the Northern Part of the United Arab Emirates	landsat; land use; land cover; United Arab Emirates; support vector machine; change detection; groundwater quality; groundwater level	This study aims to develop an integrated approach for mapping and monitoring land use/land cover (LULC) changes and to investigate the impacts of LULC changes and population growth on groundwater level and quality using Landsat images and hydrological information in a Geographic information system (GIS) environment. All Landsat images (1990, 2000, 2010, and 2018) were classified using a support v…	[Elmahdy, Samy; Ali, Tarig] Amer Univ Sharjah, GIS & Mapping Lab, POB 26666, Sharjah, U Arab Emirates; [Mohamed, Mohamed] United Arab Emirates Univ, Civil & Environm Engn Dept, POB 15551, Al Ain, U Arab Emirates; [Ali, Tarig] Amer Univ Sharjah, Coll Engn, Civil Engn Dept, POB 26666, Sharjah, U Arab Emirates	15	10.3390/rs12111715
240	Abou Samra, Rasha M.; El-Barbary, Samah M. A.	The use of remote sensing indices for detecting environmental changes: a case study of North Sinai, Egypt	Land use/land cover; Change detection; GIS; Remote sensing	This study aims to identify environmental changes during the last 25 years in northern Sinai, Egypt. In the present research, various remote sensing indices were applied to detect environmental changes. To achieve this purpose, two Landsat TM (dated August 1990) and Landsat 8 (dated August 2015) images were used. Using remote sensing and GIS software, the two images were classified into six land …	[Abou Samra, Rasha M.] Damietta Univ, Fac Sci, Environm Sci Dept, New Damietta, Egypt; [El-Barbary, Samah M. A.] NRIAG, Cairo, Egypt	2	10.1007/s41324-018-0211-1
241	Gomez, Francisco; Cochran, William J.; Yassminh, Rayan; Jaafar, Rani; Reilinger, Robert; Floyd, Mike; King, Robert W.; Barazangi, Muawia	Fragmentation of the Sinai Plate indicated by spatial variation in present-day slip rate along the Dead Sea Fault System	Satellite geodesy; Kinematics of crustal and mantle deformation; Neotectonics; Continental tectonics: strike-slip transforms	A comprehensive GPS velocity field along the Dead Sea Fault System (DSFS) provides new constraints on along-strike variations of near-transform crustal deformation along this plate boundary, and internal deformation of the Sinai and Arabian plates. In general, geodetically derived slip rates decrease northwards along the transform (5.0 +/- 0.2 to 2.2 +/- 0.5 mm yr(-1)) and are consistent with geo…	[Gomez, Francisco; Yassminh, Rayan; Jaafar, Rani] Univ Missouri, Dept Geol Sci, Columbia, MO 65211 USA; [Cochran, William J.] Virginia Tech, Dept Geosci, Darring Hall, Blacksburg, VA 24060 USA; [Reilinger, Robert; Floyd, Mike; King, Robert W.] MIT, Dept Earth Atmospher & Planetary Sci, Cambridge, MA 02142 USA; [Barazangi, Muawia] Cornell Univ, Inst Study Continents, Snee Hall, Ithaca, NY 14853 USA	11	10.1093/gji/ggaa095
242	Engel, Max; Boesl, Fabian; Brueckner, Helmut	Migration of Barchan Dunes in Qatar-Controls of the Shamal, Teleconnections, Sea-Level Changes and Human Impact	Aeolian geomorphology; Arabian Peninsula; Arabian/Persian Gulf; remote sensing; Holocene landscape change	Barchan dune fields are a dominant landscape feature in SE Qatar and a key element of the peninsula's geodiversity. The migration of barchan dunes is mainly controlled by dune size, wind patterns, vegetation cover and human impact. We investigate the variability of dune migration in Qatar over a time period of 50 years using high-resolution satellite and aerial imagery. We then explore its relati…	[Engel, Max] Geol Survey Belgium, Royal Belgian Inst Nat Sci, OD Earth & Hist Life, Jennerstr 13, B-1000 Brussels, Belgium; [Boesl, Fabian; Brueckner, Helmut] Univ Cologne, Inst Geog, Zulpicher Str 45, D-50674 Cologne, Germany	7	10.3390/geosciences8070240
243	Elhag, Mohamed; Gitas, Ioannis; Othman, Anas; Bahrawi, Jarbou; Gikas, Petros	Assessment of Water Quality Parameters Using Temporal Remote Sensing Spectral Reflectance in Arid Environments, Saudi Arabia	green normalized difference vegetation index (GNDVI); maximum chlorophyll index (MCI); normalized difference turbidity index (NDTI); Sentinel-2	Remote sensing applications in water resources management are quite essential in watershed characterization, particularly when mega basins are under investigation. Water quality parameters help in decision making regarding the further use of water based on its quality. Water quality parameters of chlorophyll a concentration, nitrate concentration, and water turbidity were used in the current stud…	[Elhag, Mohamed; Othman, Anas; Bahrawi, Jarbou] King Abdulaziz Univ, Fac Meteorol Environm & Arid Land Agr, Dept Hydrol & Water Resources Management, Jeddah 21589, Saudi Arabia; [Gitas, Ioannis] Aristotle Univ Thessaloniki, Sch Forestry & Nat Environm, Lab Forest Management & Remote Sensing, Thessaloniki 54124, Greece; [Gikas, Petros] Tech Univ Crete, Sch Environm Engn, Khania 73100, Greece	49	10.3390/w11030556
244	Khatib, Assem; Sizov, Alexander P.	Mapping the spatial distribution and potential expansion of agricultural plastic greenhouses in Tartus, Syria using GIS and remote sensing techniques	Plastic-covered greenhouses; protected agriculture; multi-criteria analysis; Sentinel; Geographic Information System (GIS)	In this research, the spatial distribution map of agricultural greenhouses in Tartus (Syria) was created using Sentinel-2 and high-resolution Google Earth Pro images in 2020. The potential expansion map of agricultural greenhouses was created by a set of topographic, climatic, ecological, infrastructure and land use-land cover criteria using GIS and remote sensing techniques. Our results show tha…	[Khatib, Assem] Tishreen Univ, Fac Surveying & Geomat Engn, Latakia, Syria; [Sizov, Alexander P.] Moscow State Univ Geodesy & Cartog, Fac Terr Management, Moscow, Russia	0	10.1080/10106049.2022.2134465
245	Cetinkaya, Cihan; Ozceylan, Eren; Keser, Ilhan	A GIS-based AHP approach for emergency warehouse site selection: A case close to Turkey-Syria border	AHP; Case study; Coronavirus; Emergency warehouse; GIS; Site selection	Although the term disaster includes natural events like earthquake, flood, and drought, it also covers the wars, intense migration waves, industrial accidents, and even epidemic diseases. In recent years, the number and severity of both natural and man-made disasters has been increasing. In this context Gaziantep-the border city of Turkey to Syria-is facing many logistical problems because of the…	[Cetinkaya, Cihan] Adana Alparslan Turkes Sci & Technol Univ, Management Informat Syst Dept, Adana, Turkey; [Ozceylan, Eren] Gaziantep Univ, Dept Ind Engn, Gaziantep, Turkey; [Keser, Ilhan] Disaster & Emergency Management Presidency, Gaziantep Branch, Gaziantep, Turkey	0	10.36909/jer.10635
246	Gunes, Coskun; Pekkan, Emrah; Tun, Muammer	Using of GIS on field geology studies: An application on central-southern of Eskisehir	Eskisehir basin; Geographial information systems; Field geolgy; Stratigraphy	Technological developments on Geographical Information Systems (GIS) make possible to use its applications on all departments of earth sciences. GIS based drill-hole data, lithological and structural maps are used integrated with field geolgy investigations in this study. The area where is bordered Batikent-Yukari Sogutonu districts on northwest and Vadisehir-Ihlamurkent districts on southeast is…	[Gunes, Coskun; Pekkan, Emrah; Tun, Muammer] Eskisehir Tech Univ, Res Inst Earth & Space Sci, Eskisehir, Turkey	0	10.19111/bulletinofmre.669305
247	Almalki, Khalid A.; Al Mosallam, Mobarak S.; Aldaajani, Thamer Z.; Al-Namazi, Ali A.	Landforms characterization of Saudi Arabia: Towards a geomorphological map	Saudi Arabia; Landforms; Geomorphology; Remote Sensing; GIS; Geology; Soil; Vegetation	Geomorphological mapping became one of the important aspects of landforms depiction, which has been developed from classical field-based to remotely sensed-based observations with or without ground-truthing over the last few decades. The availability of such data is essential for land-use planning as well as for decision -makers. To that end, we have created a simplified SRTM-based map for Saudi …	[Almalki, Khalid A.; Al Mosallam, Mobarak S.; Aldaajani, Thamer Z.; Al-Namazi, Ali A.] King Abdulaziz City Sci & Technol KACST, Riyadh, Saudi Arabia	0	10.1016/j.jag.2022.102945
248	Ghanbari, Hamid; Homayouni, Saeid; Ghamisi, Pedram; Safari, Abdolreza	Radiometric Normalization of Multitemporal and Multisensor Remote Sensing Images Based on a Gaussian Mixture Model and Error Ellipse	Change detection; error ellipse; Gaussian mixture model; multitemporal images; natural hazards; radiometric normalization	Relative radiometric normalization is often required in time series analysis of satellite Earth observations such as land cover change detection. Normalization process reduces the radiometric differences caused by changes in the environmental conditions during the acquisition of multitemporal satellite images. In this paper, we proposed an efficient and automatic method based on Gaussian mixture …	[Ghanbari, Hamid; Safari, Abdolreza] Univ Tehran, Coll Engn, Sch Surveying & Geospatial Engn, Tehran 1639957131, Iran; [Homayouni, Saeid] Univ Ottawa, Dept Geog Environm & Geomat, Ottawa, ON K1N 6N5, Canada; [Ghamisi, Pedram] Helmholtz Zentrum Dresden Rossendorf, Helmholtz Inst Freiberg Resource Technol, D-09599 Freiberg, Germany	8	10.1109/JSTARS.2018.2871373
249	Hamdani, Nadia; Baali, Abdennasser	Characterization of groundwater potential zones using analytic hierarchy process and integrated geomatic techniques in Central Middle Atlas (Morocco)	Groundwater potential mapping; HAND geomorphology model; RS; AHP; GIS	Analytic hierarchy process (AHP) is an invaluable tool that has been applied by different specialists to upgrade their administration capacity. Managing groundwater resources particularly under arid land faces several limitations and problems such as the implications of various spatial factors, which lead managers to utilize multicriteria decision. In this research, a consistent approach was appl…	[Hamdani, Nadia; Baali, Abdennasser] Univ Sidi Mohamed Ben Abdellah, Lab Geosyst Environm & Sustainable Dev, Fac Sci Dhar El Mahraz, BP 1796, Fez Atlas 30003, Morocco	12	10.1007/s12518-020-00300-z
250	Hereher, Mohamed; Al-Awadhi, Talal; Al-Hatrushi, Salim; Charabi, Yassine; Mansour, Shawky; Al-Nasiri, Noura; Sherief, Youssef; El-Kenawy, Ahmed	Assessment of the coastal vulnerability to sea level rise: Sultanate of Oman	CVI; Oman; Remote sensing; Sea level rise	The Sultanate of Oman overlooks three water bodies: The Arabian Sea, the Sea of Oman and the Arabian Gulf with a coastal face of more than 3000 km. Due to the recent global climate change, storm intensity has increased and inundation of coastal areas is inevitable. The pattern of coastal flooding depends on the geomorphologic and oceanographic characteristics of the coastal zone. The current rese…	[Hereher, Mohamed; Al-Awadhi, Talal; Al-Hatrushi, Salim; Charabi, Yassine; Mansour, Shawky; Al-Nasiri, Noura; Sherief, Youssef; El-Kenawy, Ahmed] Sultan Qaboos Univ, Coll Arts & Social Sci, Geog Dept, Muscat, Oman; [Hereher, Mohamed] Damietta Univ, Fac Sci, Dept Environm Sci, New Damietta, Egypt; [Mansour, Shawky] Alexandria Univ, Fac Arts, Dept Geog & GIS, Alexandria, Egypt; [Sherief, Youssef] Z…	11	10.1007/s12665-020-09113-0
251	Choy, Lam Kuok; Jaafar, Mokhtar; Halime, Layal Abdul Rahim; Asnawi, Nur Hakimah; Rose, Rosniza Aznie Che	Analysis of land use and land cover change of Sidon City, Lebanon	GIS; land-use; land-cover; remote sensing; Sidon; urban expansion	The rapid industrialization and urbanization of an area requires quick preparation of actual land use and land cover (LULC) maps in order to detect and avoid overuse and damage of the landscape beyond sustainable development limits. Remote sensing technology fits well for longterm monitoring and assessment of such effects. The aim of this study is to analyze the expansion of urbanization and LULC…	[Choy, Lam Kuok; Jaafar, Mokhtar; Halime, Layal Abdul Rahim; Asnawi, Nur Hakimah; Rose, Rosniza Aznie Che] Univ Kebangsaan Malaysia, Fac Social Sci & Humanities, Ctr Res Dev Social & Environm SEEDS, Geog Programme, Bangi, Malaysia	2	10.17576/geo-2020-1603-09
252	Saoud, Mohammed; Meddi, Mohamed	Mapping of Erosion Using USLE, GIS and Remote Sensing in Wadi El Hachem Watershed (Northern Algeria): Case Study	Erosion; Wadi El Hachem; USLE; Remote sensing; GIS	Algeria is one of the countries affected by water erosion. This phenomenon removes the top layer and leads to a degraded soil. This study includes an estimation of water erosion in Wadi El Hachem watershed using the Universal Soil Loss Equation (USLE) model combined with geographical information system and remote sensing techniques. The average erosion rate (A) in the watershed is estimated at 19…	[Saoud, Mohammed] Higher Natl Sch Agron ENSA, Algiers, Algeria; [Meddi, Mohamed] Higher Natl Sch Hydraul ENSH GEE Lab, Blida, Algeria	1	10.1007/s12524-021-01481-9
253	Mattar, Yousry; Al Ghamdi, Ahmed	Hydrometeorological study on the impact of the weather state ?Rahw? on the water resources in southwestern regions, Kingdom of Saudi Arabia	Weather state; Hydrometeorology; Water resources; Rainfall; Dams; Saudi Arabia	In the arid regions, some heavy rainstorms and weather states may be happened annually and con-tinued for few to many days resulting in large, or extreme flood events. The western and southwest-ern regions in the Kingdom of Saudi Arabia (KSA); Al Madinah, Makkah, Al Bahah, Asir, Jazan, and Najran, as well as some parts of the neighboring countries such as Oman, United Arab Emirates, and Yemen hav…	[Mattar, Yousry] Minist Environm Water & Agr, Water Deputy Minist, Riyadh, Saudi Arabia; [Mattar, Yousry] United Nation Dev Program UNDP, Riyadh, Saudi Arabia; [Al Ghamdi, Ahmed] Minist Environm Water & Agr, Water Resources Directorate, Riyadh, Saudi Arabia	0	10.5004/dwt.2022.28226
254	Ghrefat, Habes; Hakami, Ahmed; Ibrahim, Elkhedr; Mogren, Saad; Qaysi, Saleh; Abdelrahman, Kamal; Zaidi, Faisal K.	Damage Assessment of a Salt Dome in Jizan, Southwestern Saudi Arabia, Using High Spatial Resolution Remote Sensing Data	assessment; damage; Jizan; high spatial resolution; salt dome	The salt dome in Jizan, southwestern Saudi Arabia, has caused several problems related to underground dissolution, particularly in the old part of the city. Examples of these problems include surface collapse, building failure, fracturing, tilting, and road cracking. Analysis of the salt dome using X-ray diffraction (XRD) revealed the dominance of gypsum, anhydrite, and halite. This study evaluat…	[Ghrefat, Habes; Hakami, Ahmed; Ibrahim, Elkhedr; Mogren, Saad; Qaysi, Saleh; Abdelrahman, Kamal; Zaidi, Faisal K.] King Saud Univ, Coll Sci, Dept Geol & Geophys, Riyadh, Saudi Arabia	1	10.3389/feart.2021.700337
255	Zaina, Federico; Nabati Mazloumi, Yasaman	A multi-temporal satellite-based risk analysis of archaeological sites in Qazvin plain (Iran)	archaeological risk analysis; cultural heritage; GIS; Iran; landscape archaeology; remote sensing	In recent decades, we have witnessed a dramatic increase in the risks and damages to archaeological sites and heritage places across the globe. By analysing a case study (the Qazvin plain) in northern Iran, we propose a classification of the types of risks and damages to archaeological sites and we assess the impact of each type over the last 40 years (1980s-2020s). Our research methodology consi…	[Zaina, Federico; Nabati Mazloumi, Yasaman] Univ Bologna, Dept Hist & Cultures, Pzza San Giovanni Monte 2, I-40124 Bologna, Italy	3	10.1002/arp.1818
256	Ben-Romdhane, Haifa; Ouarda, Taha B. M. J.; Marpu, Prashanth; Rajan, Anbiah; Bugla, Ibrahim; Perry, Richard J. O.; Ghedira, Hosni	Studying coral reef patterns in UAE waters using panel data analysis and multinomial logit and probit models	Coral reef patterns; United Arab Emirates; Panel data analysis; Multinomial logit; Probit models	Like coral reefs around the world, the reefs of the United Arab Emirates (UAE) are facing global climate change and associated threats. The coasts and islands that flank Abu Dhabi host an important number of corals that should be the focus of conservation actions. Well-designed conservation and management plans require efficient monitoring systems that include understanding coral reef patterns. T…	[Ben-Romdhane, Haifa; Marpu, Prashanth; Ghedira, Hosni] Khalifa Univ, Masdar Campus, Abu Dhabi, U Arab Emirates; [Ouarda, Taha B. M. J.] Natl Inst Sci Res, INRS ETE, Quebec City, PQ, Canada; [Rajan, Anbiah; Bugla, Ibrahim; Perry, Richard J. O.] Environm Agcy Abu Dhabi, Abu Dhabi, U Arab Emirates	1	10.1016/j.ecolind.2019.106050
257	Gaznayee, Heman Abdulkhaleq A.; Al-Quraishi, Ayad M. Fadhil; Mahdi, Karrar; Ritsema, Coen	A Geospatial Approach for Analysis of Drought Impacts on Vegetation Cover and Land Surface Temperature in the Kurdistan Region of Iraq	drought; KRI; NDVI; LST	Drought is a common event in Iraq's climate, and the country has severely suffered from drought episodes in the last two decades. The Kurdistan Region of Iraq (KRI) is geographically situated in the semi-arid zone in Iraq, whose water resources have been limited in the last decades and mostly shared with other neighboring countries. To analyze drought impacts on the vegetation cover and the land …	[Gaznayee, Heman Abdulkhaleq A.] Salahaddin Univ, Coll Agr Engn Sci, Dept Forestry, Erbil 44003, Kurdistan Regio, Iraq; [Al-Quraishi, Ayad M. Fadhil] Tishk Int Univ, Fac Engn, Petr & Min Engn Dept, Erbil 44001, Kurdistan Regio, Iraq; [Mahdi, Karrar; Ritsema, Coen] Wageningen Univ & Res, Soil Phys & Land Management Grp, NL-6700 AA Wageningen, Netherlands	5	10.3390/w14060927
258	Rahmani, Souad; Benmassoud, Hassen	MODELLING OF FOREST FIRE RISK SPATIAL DISTRIBUTION IN THE REGION OF AURES, ALGERIA	modelling; forest; fire; risk; Analytic Hierarchy Process (AHP); GIS; remote sensing	The objective of this study is to model and map the forest fire risk in the region of Aures situated in the northeast of Algeria, through the application of Analytical Hierarchy Process (AHP) method to integrate geographic information systems (GIS) and remote sensing. The methodology is based on a weighted linear combination of three parameters, namely, vegetation, topography and the anthropogeni…	[Rahmani, Souad] Univ Batna 2, Fac Nat & Life Sci, Dept Ecol & Environm, Lab Improvement Agr Prod & Protect Ecosyst Arid Z, St Constantine Fesdis 53, Batna 05078, Algeria; [Benmassoud, Hassen] Univ Batna 1, Inst Vet Sci & Agron Sci, Dept Agr Sci, Lab Improvement Agr Prod & Protect Ecosyst Arid Z, Ave Chahid Boukhlouf 5, Batna 05000, Algeria	3	10.15291/geoadria.2846
259	AbdelRahman, Mohamed A. E.; Hegab, Rehab H.; Yossif, Taher M. H.	Soil fertility assessment for optimal agricultural use using remote sensing and GIS technologies	Land capability; Land forms; Spatial analysis; Soil data; Soil fertility index; Land use planning	An uneasy population increase requires expansion of the agricultural area. Egypt has a strategic direction in expanding agricultural areas, which highlights the objective of the research that is to assess soil fertility through its geographical assessment and remote sensing. The examination region of this investigation is situated in north region of west desert, about 55 km, west of Cairo, Egypt.…	[AbdelRahman, Mohamed A. E.] Natl Author Remote Sensing & Space Sci NARSS, Cairo, Egypt; [Hegab, Rehab H.; Yossif, Taher M. H.] Desert Res Ctr DRC, Cairo, Egypt	11	10.1007/s12518-021-00376-1
260	Abdelkareem, Mohamed; El-Baz, Farouk	Characterizing hydrothermal alteration zones in Hamama area in the central Eastern Desert of Egypt by remotely sensed data	Remote sensing; GIS; alteration zone; mineral resources	Remote sensing techniques provide meaningful information to mineral exploration by identifying the hydrothermally altered minerals and the fracture/fault systems. In this article, Advanced Spaceborne Thermal Emission and Reflection Radiometer (ASTER) data were processed to detect the hydrothermal alteration zones in Hamama area in the central part of the Eastern Desert of Egypt. Band ratios and p…	[Abdelkareem, Mohamed] South Valley Univ, Geol Dept, Qena, Egypt; [Abdelkareem, Mohamed; El-Baz, Farouk] Boston Univ, Ctr Remote Sensing, Boston, MA 02215 USA	13	10.1080/10106049.2017.1325410
261	Sayl, Khamis; Adham, Ammar; Ritsema, Coen J.	A GIS-Based Multicriteria Analysis in Modeling Optimum Sites for Rainwater Harvesting	GIS; AHP; fuzzy AHP; rainwater harvesting; Iraq	In order to select suitable rainwater harvesting sites within the study area, rainwater harvesting criteria needed to be determined, defined, and structured. Several criteria played an important role in selecting the most suitable rainwater harvesting sites. A multicriteria analysis (MCA) approach, which is widely used to classify potential rainwater harvesting sites, was chosen to help select po…	[Sayl, Khamis] Univ Anbar, Dept Dams & Water Resources, Engn Coll, Ramadi 31001, Iraq; [Adham, Ammar] Univ Anbar, Dept Civil Engn, Engn Coll, Ramadi 31001, Iraq; [Adham, Ammar; Ritsema, Coen J.] Wageningen Univ, Soil Phys & Land Management Grp, POB 47, NL-6700 AA Wageningen, Netherlands	11	10.3390/hydrology7030051
262	Ahmed, Alaa A.; Shabana, Ashraf R.	Integrating of remote sensing, GIS and geophysical data for recharge potentiality evaluation in Wadi El Tarfa, eastern desert, Egypt	Geospatial; Groundwater; Recharge; Remote sensing; Wadi El Tarfa; Eastern desert	In Egypt, water resources management is considered a major socio-economic issue and a central component for future development. With the increasing rate of population growth, urbanization and agricultural expansion, groundwater resources are gaining more demand and attention. Wadi El Tarfa area is one of the semi-arid areas located in the Eastern Desert of Egypt, composed of Cretaceous and Eocene…	[Ahmed, Alaa A.] Univ South Australia, Nat & Built Environm Res Ctr, Sch Nat & Built Environm, Adelaide, SA 5095, Australia; [Ahmed, Alaa A.; Shabana, Ashraf R.] Desert Res Ctr, Geol Dept, Div Water Resource, Mathaf El Matariya St, Cairo 11753, Egypt	7	10.1016/j.jafrearsci.2020.103957
263	Bendouda, Malika; Berrached, Nasreddine	Urban Road Network Extraction from Remote Sensing Images Using an Improved F* Algorithm	GIS; Urban road network; Semi-automatic; Low-resolution; Dynamic programing; F* algorithm	A city mapping is essential to various applications such as planning, transport management, vehicle navigation, intervention in natural disasters, etcaEuro broken vertical bar. For convenience and efficiency, such applications are integrated in a Geographical Information System (GIS) (Bendouda and Berrached, in Etude et r,alisation d'UREGIS un SIG pour la gestion du r,seau routier urbain, Magiste…	[Bendouda, Malika; Berrached, Nasreddine] Univ Sci & Technol Oran Mohamed Boudiaf, Fac Genie Electr, Dept Electron, Lab Rech Syst Intelligents LARESI, Oran, Algeria	0	10.1007/s12524-018-0773-3
264	Dalton, Matthew; McMahon, Jane; Kennedy, Melissa A.; Repper, Rebecca; Al Shilali, Saifi Eisa; AlBalawi, Yousef; Boyer, David D.; Thomas, Hugh	The Middle Holocene 'funerary avenues' of north-west Arabia	Bronze Age; cultural landscapes; funerary archaeology; human; environment interaction; Middle Holocene; mobility; oasis agriculture; pastoralism; remote sensing; Saudi Arabia; territoriality	The desert regions of the Arabian Peninsula and Levant are criss-crossed by innumerable pathways. Across large areas of north-west Arabia, many of these pathways are flanked by stone monuments, the vast majority of which are ancient tombs. Recent radiometric dating indicates that the most abundant of these monuments, elaborate and morphologically diverse 'pendant' structures, were constructed dur…	[Dalton, Matthew; McMahon, Jane; Kennedy, Melissa A.; Repper, Rebecca; Boyer, David D.; Thomas, Hugh] Univ Western Australia, Class & Ancient Hist, 35 Stirling Hwy, Perth, WA 6009, Australia; [Al Shilali, Saifi Eisa] Royal Commiss AlUla, Khaybar, Saudi Arabia	2	10.1177/09596836211060497
265	Weston, Michael John; Temimi, Marouane; Nelli, Narendra Reddy; Fonseca, Ricardo Morais; Thota, Mohana Satyanarayana; Valappil, Vineeth Krishnan	On the Analysis of the Low-Level Double Temperature Inversion Over the United Arab Emirates: A Case Study During April 2019	Ocean temperature; Microwave radiometry; Clouds; Storms; Temperature measurement; Electromagnetic heating; Satellite broadcasting; Cloud-aerosol Lidar and infrared pathfinder satellite observations (CALIPSO); double-temperature inversion; dust layer; hyperarid region; microwave radiometer (MWR); spinning-enhanced visible and infrared imager (SEVIRI)	This letter investigates a double temperature inversion event, which persisted during April 23-27, 2019 over the United Arab Emirates, which coincided with anomalously cold surface temperatures. An analysis of in situ meteorological data, a microwave radiometer and radiosonde profiles, and aerosol profiles from the Cloud-Aerosol Lidar and Infrared Pathfinder Satellite Observations satellite revea…	[Weston, Michael John; Temimi, Marouane; Nelli, Narendra Reddy; Fonseca, Ricardo Morais; Thota, Mohana Satyanarayana; Valappil, Vineeth Krishnan] Khalifa Univ Sci & Technol, Masdar Inst, Abu Dhabi 54224, U Arab Emirates	12	10.1109/LGRS.2020.2972597
266	Al-Mulla, Yaseen; Al-Ruheili, Amna; Al-Lawati, Ali; Parimi, Krishna; Ali, Ahsan; Al-Sadi, Nadya; Al-Harrasi, Faisal	Assessment of Urban Expansion's Impact on Changes in Vegetation Patterns in Dhofar, Oman, Using Remote Sensing and GIS Techniques	Vegetation mapping; Remote sensing; Sea measurements; Satellites; Geospatial analysis; Image classification; Urban areas; Image processing; Geographic information systems; Image classification; image processing; remote sensing; geographic information systems; vegetation; geospatial and temporal mapping; urban areas	The impact of urbanization on vegetation is poorly studied in sparsely vegetated desert steppe-type vegetation. This study investigates the spatial and temporal impacts of urbanization over 40 years on plant species in Dhofar's mountains, plains, and bay areas. Satellite images covering 1978 to 2018 were used as Remote Sensing (RS) tools, along with Geographic Information System (GIS) techniques,…	[Al-Mulla, Yaseen; Parimi, Krishna; Ali, Ahsan] Sultan Qaboos Univ, Remote Sensing & GIS Res Ctr, Muscat 123, Oman; [Al-Mulla, Yaseen] Sultan Qaboos Univ, Dept Soils Water & Agr Engn, Muscat 123, Oman; [Al-Ruheili, Amna] Sultan Qaboos Univ, Dept Plant Sci, Muscat 123, Oman; [Al-Lawati, Ali] Univ Nizwa, Nat & Med Sci Res Ctr, Birkat Al Mauz 616, Nizwa, Oman; [Al-Sadi, Nadya] Oman Anim & Plant Gene…	1	10.1109/ACCESS.2022.3198942
267	Abdo, Hazem Ghassan	Estimating water erosion using RUSLE, GIS and remote sensing in Wadi-Qandeel river basin, Lattakia, Syria	Soil loss; RUSLE; GIS; RS; Conservation; Syria	Soil erosion is the major prominent ecological risk threatening agricultural sustainability in the coastal region of western Syria. The ongoing war conditions in Syria has led to a lack of field data and measurements related to the spatial evolution of soil loss. Estimating the spatial distribution of potential soil loss is a fundamental procedure in applying the soil conservations measures withi…	[Abdo, Hazem Ghassan] Tartous Univ, Fac Arts & Humanities, Dept Geog, Tartous, Syria; [Abdo, Hazem Ghassan] Damascus Univ, Fac Arts & Humanities, Dept Geog, Damascus, Syria; [Abdo, Hazem Ghassan] Tishreen Univ, Fac Arts & Humanities, Dept Geog, Latakia, Syria	2	10.1007/s43538-021-00047-0
268	Abdelhaleem, Fahmy Salah; Basiouny, Mohamed; Ashour, Eid; Mahmoud, Ali	Application of remote sensing and geographic information systems in irrigation water management under water scarcity conditions in Fayoum, Egypt	GIS; Land use change; NDVI; RS; Urbanization; Water management	Egypt suffers from severe water scarcity, which affects the sustainability of agricultural production. Therefore, the sustainable use of available water resources under water scarcity requires the adoption of water allocation policies favoring conservative and efficient use. Water management with free satellite data and geographical information system modeling capabilities can be a valuable appro…	[Abdelhaleem, Fahmy Salah] Benha Univ, Benha Fac Engn, Civil Engn Dept, Banha 13512, Qalubiya, Egypt; [Basiouny, Mohamed] Benha Univ, Benha Fac Engn, Sanit Engn, Banha, Qalubiya, Egypt; [Ashour, Eid] Natl Water Res Ctr NWRC, Hydraul Res Inst HRI, Cairo, Egypt; [Mahmoud, Ali] Fayoum Univ, Fac Agr, Al Fayyum 63514, Egypt	8	10.1016/j.jenvman.2021.113683
269	Foroughi, Hassan; Naseri, Abd Ali; Nasab, Saeed Boroomand; Hamzeh, Saeid; Sadeghi, Morteza; Tuller, Markus; Jones, Scott B.	A new mathematical formulation for remote sensing of soil moisture based on the Red-NIR space		Optical remote sensing of earth surface processes commonly relies on the red, green, blue (RGB), near-infrared (NIR) and shortwave-infrared (SWIR) electromagnetic bands. Most of the optical sensors mounted on unmanned aerial vehicles and satellites provide the RGB and NIR bands, but only a few offer SWIR output. The Red-NIR reflectance space has been widely applied for remote sensing of various l…	[Foroughi, Hassan; Naseri, Abd Ali; Nasab, Saeed Boroomand] Shahid Chamran Univ Ahvaz, Dept Irrigat & Drainage, Ahvaz, Iran; [Foroughi, Hassan; Jones, Scott B.] Utah State Univ, Dept Plants Soils & Climate, Logan, UT 84322 USA; [Hamzeh, Saeid] Univ Tehran, Dept Remote Sensing & GIS, Tehran, Iran; [Sadeghi, Morteza] Univ Minnesota, Dept Civil Environm & Geoengn, Minneapolis, MN USA; [Tuller, Marku…	3	10.1080/01431161.2020.1770365
270	Othman, Abdullah; Shaaban, Fathy; Abotalib, Abotalib Z.; El-Saoud, Waleed A.; Gabr, Safwat S.; Habeebullah, Turki; Hegazy, Doaa	Hazard Assessment of Rockfalls in Mountainous Urban Areas, Western Saudi Arabia	Makkah region; Thawr mountain; Remote sensing; Precipitation; Natural hazards	Global warming and anticipated increase in rainfall frequency and magnitude are linked to enhanced rockfall activity worldwide. Arid environments, which currently receive limited amount of annual rainfall, will be particularly subject to frequent and unpredictable rockfall activity that can substantially jeopardize human lives and infrastructures. The main scope of this study is to assess the roc…	[Othman, Abdullah; Shaaban, Fathy; El-Saoud, Waleed A.] Umm Al Qura Univ, Dept Environm & Hlth Res, Nat Hazards Res Unit, Mecca 21955, Saudi Arabia; [Shaaban, Fathy] Natl Res Inst Astron & Geophys, Dept Geomagnet & Geoelect, Cairo, Egypt; [Abotalib, Abotalib Z.] Univ Southern Calif, Viterbi Sch Engn, Los Angeles, CA 90007 USA; [Abotalib, Abotalib Z.; Gabr, Safwat S.; Hegazy, Doaa] Natl Author Rem…	10	10.1007/s13369-020-05098-x
271	Bourjila, Abdelhak; Dimane, Fouad; El Ouarghi, Hossain; Nouayti, Nordine; Taher, Morad; El Hammoudani, Yahya; Saadi, Omar; Bensiali, Anas	Groundwater potential zones mapping by applying GIS, remote sensing and multi-criteria decision analysis in the Ghiss basin, northern Morocco	GWPZ modeling; GIS; Remote sensing; AHP; Fewer parameters; Al hoceima	The Ghiss watershed, located in a Mediterranean semi-arid area, is currently experiencing a prolonged drought. The scarcity of potable surface water has driven the population and the government to intensify the exploration of groundwater resources. Conventional methods used for groundwater exploration are generally expensive, time-consuming and are limited in space. Therefore, we suggest with the…	[Bourjila, Abdelhak; Dimane, Fouad; El Ouarghi, Hossain; Nouayti, Nordine; El Hammoudani, Yahya; Saadi, Omar] Abdelmalek Essaadi Univ, Lab Appl Sci, Res Team Water & Environm Management G2E, ENSAH, Al Hoceima, Morocco; [Taher, Morad] Abdelmalek Essaadi Univ, Fac Sci & Tech, Dept Geol, Tangier, Morocco; [Bensiali, Anas] Mohammed First Univ, Fac Letters & Human Sci, Dept Geog, Oujda, Morocco	4	10.1016/j.gsd.2021.100693
272	Hind, Madani; M'hammed, Setti; Djamal, Akziz; Zoubida, Nemer	Assessment of land use-land cover changes using GIS, remote sensing, and CA-Markov model: a case study of Algiers, Algeria	Landsat image; GIS; Remote sensing; CA-Markov; LULCC; Algiers	This paper analyzes the spatio-temporal change of land use and the regression of agricultural and forest areas in the capital of Algeria Algiers. A methodology based on a Geographic Information System (GIS) environment and remote sensing to process and analyze a series of satellite images from 1987 to 2018 was used to categorize the soil into urban, agricultural, forestry, and water areas. In add…	[Hind, Madani; M'hammed, Setti] Univ Sci & Technol Houari Boumediene USTHB, Fac Earth Sci Geog & Terr Planning, Lab Cities Reg & Terr Governance LVRGT, Algiers, Algeria; [Djamal, Akziz] Univ Sci & Technol Houari Boumediene USTHB, Fac Earth Sci Geog & Terr Planning, Lab Geomorphol & Geohazards G&G, Algiers, Algeria; [Zoubida, Nemer] Univ Sci & Technol Houari Boumediene USTHB, Fac Earth Sci Geog & …	0	10.1007/s12518-022-00472-w
273	Zyoud, Shaher H.; Zyoud, Ahed H.	Mapping environmental impact assessment research landscapes in the Arab world using visualization and bibliometric techniques	The Arab world; Bibliometric analysis; Biomarkers; Ecosystems; Environmental impact assessment; Environmental degradation; Sustainability; Visualization mapping	Interests and concerns on environmental issues have attracted much attention over the past few decades. This is in harmony with the growing understanding of environmental impacts associated with human activities and their role in degrading ecosystems. In line with these concerns, considerable advances in science and technology to assess, mitigate, or lessen these adverse impacts have emerged (i.e…	[Zyoud, Shaher H.] Palestine Tech Univ Kadoorie, Dept Bldg Engn & Environm, Tulkarem, Palestine; [Zyoud, Ahed H.] An Najah Natl Univ, Dept Chem, Coll Sci, Nablus, Palestine	4	10.1007/s11356-021-13696-x
274	Abbas, Malik R.; Hason, MahIr Mahmod; Ahmad, Baharin Bin; Abbas, Talib R.	Surface roughness distribution map for Iraq using satellite data and GIS techniques	Surface roughness; NDVI; GIS; MODIS	This study shows the potential of using the satellite data techniques that are supported by the GIS and remote sensing (RS) approaches to produce the roughness map for the surface of Iraq and any area in a very efficient manner. Normalized difference vegetation index (NDVI) was generated using MODIS data acquired on 23 April 2015. Thirty-six points were used to build and verify the proposed model…	[Abbas, Malik R.; Ahmad, Baharin Bin] Univ Teknol Malaysia, Fac Built Environm & Surveying, Skudai, Johor, Malaysia; [Abbas, Malik R.; Hason, MahIr Mahmod] Minist Sci & Technol, Disaster Management Ctr, Baghdad, Iraq; [Hason, MahIr Mahmod] Univ Putra Malaysia, Fac Civil Engn, Seri Kembangan, Selangor, Malaysia; [Abbas, Talib R.] Minist Sci & Technol, Environm & Water Directorate, Baghdad, Iraq	3	10.1007/s12517-020-05802-z
275	Melis, Maria Teresa; Pisani, Luca; De Waele, Jo	On the Use of Tri-Stereo Pleiades Images for the Morphometric Measurement of Dolines in the Basaltic Plateau of Azrou (Middle Atlas, Morocco)	remote sensing; karst; sinkholes; morphometry; collapse; GIS	Hundreds of large and deep collapse dolines dot the surface of the Quaternary basaltic plateau of Azrou, in the Middle Atlas of Morocco. In the absence of detailed topographic maps, the morphometric study of such a large number of features requires the use of remote sensing techniques. We present the processing, extraction, and validation of depth measurements of 89 dolines using tri-stereo Pleia…	[Melis, Maria Teresa] Univ Cagliari, Dept Chem & Geol Sci, Cittadella Univ SS 554 Bivio Sestu I, I-09042 Cagliari, Italy; [Pisani, Luca; De Waele, Jo] Univ Bologna, Dept Biol Geol & Environm Sci, Via Zamboni 67, I-40126 Bologna, Italy	3	10.3390/rs13204087
276	Jumaah, Huda Jamal; Ameen, Mohammed Hashim; Mohamed, Ghadah Hasan; Ajaj, Qayssar Mahmood	Monitoring and evaluation Al-Razzaza lake changes in Iraq using GIS and remote sensing technology q	ISO cluster unsupervised classification; Surface water area; Remote sensing; Geographic Information Systems; Shoreline; Retraction ratio	This study uses remote sensing techniques and Geographic Information Systems GIS to monitor and evaluate the changes in the shoreline and the surface water area of Al-Razzazah Lake in Iraq from the year 1989 until 2020. Based on six satellite Landsat images of the study area for the years 1989, 1999, 2002, 2015, 2019, and 2020, changes were evaluated and mapped. Two methods; Support Vector Machin…	[Jumaah, Huda Jamal] Northern Tech Univ, Tech Engn Coll Kirkuk, Dept Environm & Pollut Engn, Kirkuk 36001, Iraq; [Ameen, Mohammed Hashim] Tikrit Univ, Dept Environm Engn, Engn Coll, Tikrit, Iraq; [Mohamed, Ghadah Hasan] Northern Tech Univ, Tech Inst Kirkuk, Dept Surveying, Kirkuk 36001, Iraq; [Ajaj, Qayssar Mahmood] Northern Tech Univ, Tech Engn Coll Kirkuk, Dept Surveying Engn, Kirkuk 36001, Iraq	0	10.1016/j.ejrs.2022.01.013
277	Mzuri, Rebar Tahseen; Mustafa, Yaseen T.; Omar, Abdulla Amir	Land degradation assessment using AHP and GIS-based modelling in Duhok District, Kurdistan Region, Iraq	Land degradation; AHP; GIS; remote sensing; Duhok	Land degradation is a complex process and significant environmental problem affected by both natural and anthropogenic driving factors. Globally, the prevention of land degradation has become one of the most significant challenges of the twenty-first century. Over the last decade, a marked change was observed in land degradation in the Duhok district of Iraq. Geographic Information System (GIS), …	[Mzuri, Rebar Tahseen; Omar, Abdulla Amir] Salahaddin Univ, Dept Geol, Erbil, Iraq; [Mustafa, Yaseen T.] Univ Zakho, Dept Environm Sci, Zakho, Iraq	3	10.1080/10106049.2021.1987534
278	Amiri, H. E. S.; Brain, D.; Sharaf, O.; Withnell, P.; McGrath, M.; Alloghani, M.; Al Awadhi, M.; Al Dhafri, S.; Al Hamadi, O.; Al Matroushi, H.; Al Shamsi, Z.; Al Shehhi, O.; Chaffin, M.; Deighan, J.; Edwards, C.; Ferrington, N.; Harter, B.; Holsclaw, G.; Kelly, M.; Kubitschek, D.; Landin, B.; Lillis, R.; Packard, M.; Parker, J.; Pilinski, E.; Pramman, B.; Reed, H.; Ryan, S.; Sanders, C.; Smith, …	The Emirates Mars Mission	Mars; Atmosphere; EMM; Hope	The Emirates Mars Mission (EMM) was launched to Mars in the summer of 2020, and is the first interplanetary spacecraft mission undertaken by the United Arab Emirates (UAE). The mission has multiple programmatic and scientific objectives, including the return of scientifically useful information about Mars. Three science instruments on the mission's Hope Probe will make global remote sensing measu…	[Amiri, H. E. S.] UAE Minist Ind & Adv Technol, Abu Dhabi, U Arab Emirates; [Brain, D.; Withnell, P.; McGrath, M.; Chaffin, M.; Deighan, J.; Edwards, C.; Ferrington, N.; Harter, B.; Holsclaw, G.; Kelly, M.; Kubitschek, D.; Landin, B.; Packard, M.; Pilinski, E.; Pramman, B.; Reed, H.; Ryan, S.; Sanders, C.; Tomso, C.; Wrigley, R.; Jain, S.; Jakosky, B. M.; Jones, A.] Univ Colorado, Lab Atmospher &…	17	10.1007/s11214-021-00868-x
279	Boudriki Semlali, Badr-Eddine; El Amrani, Chaker; Ortiz, Guadalupe; Boubeta-Puig, Juan; Garcia-de-Prado, Alfonso	SAT-CEP-monitor: An air quality monitoring software architecture combining complex event processing with satellite remote sensing	Remote sensing; Satellite sensors; Air quality; Complex event processing; Big data; Decision-making	Air pollution is a major problem today that causes serious damage to human health. Urban areas are the most affected by the degradation of air quality caused by anthropogenic gas emissions. Although there are multiple proposals for air quality monitoring, in most cases, two limitations are imposed: the impossibility of processing data in Near Real-Time (NRT) for remote sensing approaches and the …	[Boudriki Semlali, Badr-Eddine; El Amrani, Chaker] Abdelmalek Essaadi Univ, Fac Sci & Tech Tangier, LIST Lab, Old Way Airport,Km 10,Ziaten,POB 416, Tangier, Morocco; [Ortiz, Guadalupe; Boubeta-Puig, Juan; Garcia-de-Prado, Alfonso] Univ Cadiz, Sch Engn, UCASE Software Engn Res Grp, Avda Univ Cadiz 10, Puerto Real 11519, Spain	11	10.1016/j.compeleceng.2021.107257
280	Abdelkareem, Mohamed; Bamousa, Abdullah O.; Hamimi, Zakaria; El-Din, Gamal M. Kamal	Multispectral and RADAR images integration for geologic, geomorphic, and structural investigation in southwestern Arabian Shield, Al Qunfudhah area, Saudi Arabia	Landsat; SRTM; ALOS; PALSAR; Al Qunfudhah; Saudi Arabia	In this article, Western Saudi Arabia underwent remote sensing investigation via Operational Land Imager (OLI), Advanced Land Observing Satellite/ Phased Array type L-band Synthetic Aperture Radar (ALOS/PALSAR), Sentinal-1 and Shuttle Radar Topography Mission (SRTM). Image-transformation and enhancement techniques such as Band ratios, principal component analysis (PCA), and Minimum Noise Fraction…	[Abdelkareem, Mohamed; El-Din, Gamal M. Kamal] South Valley Univ, Geol Dept, Qena, Egypt; [Bamousa, Abdullah O.] Taibah Univ, Geol Dept, POB 30002, Al Madinah 41477, Al Munawarah, Saudi Arabia; [Hamimi, Zakaria] Benha Univ, Geol Dept, Banha, Egypt; [El-Din, Gamal M. Kamal] Prince Sattam Bin Abdulaziz Univ, Al Kharj, Saudi Arabia	7	10.1080/16583655.2020.1741957
281	Feizizadeh, Bakhtiar; Omarzadeh, Davoud; Alajujeh, Keyvan Mohammadzadeh; Blaschke, Thomas; Makki, Mohsen	Impacts of the Urmia Lake Drought on Soil Salinity and Degradation Risk: An Integrated Geoinformatics Analysis and Monitoring Approach	Google Earth Engine; environmental impacts assessment; soil salinity monitoring; soil degradation mapping; Urmia Lake Basin; Iran	Recent improvements in earth observation technologies and Geographical Information System (GIS) based spatial analysis methods require us to examine the efficiency of the different data-driven methods and decision rules for soil salinity monitoring and degradation mapping. The main objective of this study was to analyze the environmental impacts of the Lake Urmia drought on soil salinity and degr…	[Feizizadeh, Bakhtiar; Alajujeh, Keyvan Mohammadzadeh] Univ Tabriz, Dept Remote Sensing & GIS, Tabriz 51368, Iran; [Feizizadeh, Bakhtiar; Makki, Mohsen] Humboldt Univ, Dept Geog, D-10099 Berlin, Germany; [Omarzadeh, Davoud] Univ Oberta Catalunya, IN3, Barcelona, Spain; [Blaschke, Thomas] Univ Salzburg, Dept Geoinformat Z GIS, A-5020 Salzburg, Austria	0	10.3390/rs14143407
282	Hussain, Sajjad; Elfeki, Amro M.; Chaabani, Anis; Yibrie, Esubalew Adem; Elhag, Mohamed	Spatio-temporal evaluation of remote sensing rainfall data of TRMM satellite over the Kingdom of Saudi Arabia		Rainfall estimation is the most important parameter for many water resource simulations and practices; therefore, precise and long-term data are required for trustworthy precipitation depiction. Recent advancements in remote sensing applications enabled researchers to estimate rainfall with greater geographical and temporal precision. The goal of this study was to evaluate the performance of a cl…	[Hussain, Sajjad; Elfeki, Amro M.; Chaabani, Anis; Yibrie, Esubalew Adem; Elhag, Mohamed] King Abdulaziz Univ, Fac Meteorol Environm & Arid Land Agr, Dept Hydrol & Water Resources Management, Jeddah 21589, Saudi Arabia; [Elfeki, Amro M.] Mansoura Univ, Fac Engn, Irrigat & Hydraul Dept, Mansoura, Egypt; [Elhag, Mohamed] CI HEAM Mediterranean Agron Inst Chania, Dept Geoinformat Environm Management,…	0	10.1007/s00704-022-04148-8
283	El Ghazali, Fatima Ezzahra; Laftouhi, Nour-Eddine; Fekri, Ahmed; Randazzo, Giovanni; Benkirane, Myriam	Enhancing the success of new dams implantation under semi-arid climate, based on a multicriteria analysis approach: Case of Marrakech region (Central Morocco)	multicriteria analysis; geographic information system and remote sensing; dam; water-harvesting structures	Water management has become one of the major interests in arid and semi-arid regions. Scientists have suggested different criteria and methodologies for the identification of suitable dam sites. According to our literature review, we have used two major methodologies for the selection of suitable dam site location: geographic information system and remote sensing (GIS/RS) and multicriteria analys…	[El Ghazali, Fatima Ezzahra; Laftouhi, Nour-Eddine; Benkirane, Myriam] Cadi Ayyad Univ, Dept Geol, Geosci Semlalia Lab, Marrakech, Morocco; [Fekri, Ahmed] Hassan II Univ, Dept Geol, Casablanca, Morocco; [Randazzo, Giovanni] Univ Messina, Dept Geol, Geologis Lab, Messina, Italy	1	10.1515/geo-2020-0313
284	Kosmopoulos, Panagiotis G.; Kazadzis, Stelios; El-Askary, Hesham; Taylor, Michael; Gkikas, Antonis; Proestakis, Emmanouil; Kontoes, Charalampos; El-Khayat, Mohamed Mostafa	Earth-Observation-Based Estimation and Forecasting of Particulate Matter Impact on Solar Energy in Egypt	solar energy; aerosol impact; earth observation	This study estimates the impact of dust aerosols on surface solar radiation and solar energy in Egypt based on Earth Observation (EO) related techniques. For this purpose, we exploited the synergy of monthly mean and daily post processed satellite remote sensing observations from the MODerate resolution Imaging Spectroradiometer (MODIS), radiative transfer model (RTM) simulations utilizing machin…	[Kosmopoulos, Panagiotis G.; Kazadzis, Stelios] NOA, IERSD, Athens 15236, Greece; [Kazadzis, Stelios] WRC, PMOD, CH-7260 Davos, Switzerland; [El-Askary, Hesham] Chapman Univ, Ctr Excellence Earth Syst Modeling & Observat, Orange, CA 92866 USA; [El-Askary, Hesham] Chapman Univ, Schmid Coll Sci & Technol, Orange, CA 92866 USA; [El-Askary, Hesham] Alexandria Univ, Fac Sci, Dept Environm Sci, Alexand…	24	10.3390/rs10121870
285	Al-Muaini, Ahmed; Green, Steve; Abou Dahr, Wasel Abdelwahid; Kennedy, Lesley; Kemp, Peter; Dawoud, Mohamed; Clothier, Brent	Water use and irrigation requirements for date palms on commercial farms in the hyper-arid United Arab Emirates	Date-palm water-use; Commercial date production; Canopy characteristics; Proximal sensing; Remote sensing	The production of dates in the hyper-arid deserts of the United Arab Emirates (UAE) is economically and culturally important. All of the commercial date palms need to be irrigated, and the prime source of this water is groundwater. However the quantity and quality of the groundwater resources in the UAE are being compromised by groundwater extraction at 25 times the rate of recharge, and a rise i…	[Al-Muaini, Ahmed; Abou Dahr, Wasel Abdelwahid; Dawoud, Mohamed] Environm Agcy Abu Dhabi EAD, Abu Dhabi, U Arab Emirates; [Green, Steve; Clothier, Brent] New Zealand Inst Plant & Food Res Ltd, Palmerston North, New Zealand; [Kennedy, Lesley] Maven Int, Wellington, New Zealand; [Al-Muaini, Ahmed; Kemp, Peter] Massey Univ, Palmerston North, New Zealand	6	10.1016/j.agwat.2019.105702
286	Kulekci, E. Akpinar; Koc, A.	Analysis of the areas suitable for ecotourism using Geographical Information Systems: Example of Narman District (Erzurum) Turkey	Ecotourism; Geographical Information System; Narman (Erzurum); Suitability Analysis; Turkey	Aim: To protect and use the existing natural and cultural resources of Narman district with a sustainable tourism perspective and evaluate an environmentally sensitive tourism planning approach. Methodology: Natural and cultural resource values of the district were measured using Arc GIS 10.2 from GIS (Geographical Information Systems) software. For this purpose, elevation, accessibility, proximi…	[Kulekci, E. Akpinar] Ataturk Univ, Fac Architecture & Design, Dept Landscape Architecture, Yakutiye Erzurum 25240, Turkey; [Koc, A.] Dicle Univ, Diyarbakir Vocat Sch Tech Sci, Dept Pk & Garden Plants, Diyarbakir 21000, Turkey	1	10.22438/jeb/41/2(S1)/JEB-03
287	Ghrefat, Habes; Zaman, Haider; Batayneh, Awni; El Waheidi, Mahmoud M.; Qaysi, Saleh; Al-Taani, Ahmed; Jallouli, Chokri; Badhris, Omar	Assessment of Heavy Metal Contamination in the Soils of the Gulf of Aqaba (Northwestern Saudi Arabia): Integration of Geochemical, Remote Sensing, GIS, and Statistical Data	Metals; soils; Gulf of Aqaba; contamination; GIS; remote sensing	Rock and soil sample geochemical analysis was conducted to investigate the extent and causes of soil contamination in the Gulf of Aqaba region in NW Saudi Arabia. The inductively coupled plasma mass spectrometry was used to determine the concentrations of Pb, Zn, Cu, Co, Cr, Mn, Fe, Hg, Mo, and Cd in 23 soil samples and 25 samples from granitic and Cenozoic marine sedimentary formations. The geoc…	[Ghrefat, Habes; Batayneh, Awni; El Waheidi, Mahmoud M.; Qaysi, Saleh; Jallouli, Chokri; Badhris, Omar] King Saud Univ, Coll Sci, Dept Geol & Geophys, Riyadh 11451, Saudi Arabia; [Zaman, Haider] Taibah Univ, Fac Sci, Dept Geol, Medina 42353, Saudi Arabia; [Al-Taani, Ahmed] Yarmouk Univ, Dept Earth & Environm Sci, Irbid, Jordan; [Al-Taani, Ahmed] Zayed Univ, Coll Nat & Hlth Sci, Abu Dhabi, U Arab …	1	10.2112/JCOASTRES-D-20-00137.1
288	Hassini, Eya; Hassini, Sonia; Hamdi, Mohamed; Hamed, Younes	Satellite remote sensing and GIS-based multi-criteria analysis for assessing the groundwater recharge potential zones in the Regueb basin (central Tunisia)	North Africa; (Tunisia); GIS; Recharge regions; AHP	The groundwater constitutes the major water resource in the Regueb region, which is one of the most important agricultural areas in Central Tunisia. Regueb has an arid climate with minimal amounts of precipitation that result in insignificant natural recharge of its aquifer compared to the overexploitation of groundwater for agricultural activities. This study aims to map groundwater recharge are…	[Hassini, Eya] Univ Gabes, Fac Sci FSG, Gabes, Tunisia; [Hassini, Sonia] McMaster Univ, Dept Civil Engn, Hamilton, ON L8S 4L7, Canada; [Hamdi, Mohamed] Univ Sherbrooke, CARTEL Ctr Dapplicat & Rech Teledetect, Sherbrooke, PQ, Canada; [Hamed, Younes] Univ Gafsa, Fac Sci Gafsa, Lab Applicat Mat Environm Water & Energy LAM3E, City Campus Sidi Ahmed Zarroug, Gafsa 2112, Tunisia; [Hamed, Younes] Univ H…	0	10.1007/s12518-022-00478-4
289	Erdem, Firat; Atun, Rutkay; Avdan, Zehra Yigit; Atila, Ilknur; Avdan, Ugur	Drought analysis of Van Lake Basin with remote sensing and GIS technologies	Drought analysis; Remote sensing; GIS; Land surface temperature	Drought is defined as the amount of precipitation in a region less than the amount of evaporation. Human facts such as population growth, industrialization, deforestation, and uncontrolled irrigation in agriculture are among the factors that cause drought. Today, with the increase of human activities such as population growth and industrialization, drought has become a serious life-threatening is…	[Erdem, Firat; Atila, Ilknur; Avdan, Ugur] Eskisehir Tech Univ, Inst Earth & Space Sci, Iki Eylul Campus, TR-26555 Eskisehir, Turkey; [Atun, Rutkay] Sivas Cumhuriyet Univ, Engn Fac, Dept Geomat Engn, Sivas, Turkey; [Avdan, Zehra Yigit] Eskisehir Tech Univ, Engn Fac, Dept Environm Engn, Eskisehir, Turkey	2	10.1016/j.ejrs.2021.10.0061110-9823
290	Thomas, Hugh; Kennedy, Melissa; McMahon, Jane; Strolin, Laura; Franklin, Daniel; Flavel, Ambika; Noble, Jacqueline; Swift, Lauren	Monumentality, Social Memory, and Territoriality in Neolithic-Chalcolithic Northwestern Arabia	remote sensing; aerial photography; collective burial; funerary practice; Saudi Arabia; AlUla; Middle Holocene	Recent excavations undertaken by the Aerial Archaeology in the Kingdom of Saudi Arabia (AAKSA) project have recovered significant skeletal material, evidence for funerary offerings, including jewelry, and the earliest chronometrically dated domestic dog in the Arabian Peninsula. Despite being heavily disturbed by recent looting, these monumental funerary structures were found to be collective bur…	[Thomas, Hugh; Kennedy, Melissa; McMahon, Jane; Franklin, Daniel; Flavel, Ambika; Noble, Jacqueline; Swift, Lauren] Univ Western Australia, Perth, WA, Australia; [Strolin, Laura] Univ Geneva, Geneva, Switzerland; [Strolin, Laura] Museum Hist Nat Geneve, Geneva, Switzerland	6	10.1080/00934690.2021.1892323
291	Bahrawi, J. A.; Elhag, M.	CONSIDERATION OF SEASONAL VARIATIONS OF WATER RADIOMETRIC INDICES FOR THE ESTIMATION OF SOIL MOISTURE CONTENT IN ARID ENVIRONMENT IN SAUDI ARABIA	integrated water resources management; Sentinel-2; soil water content; remote sensing; water radiometric indices	Remote Sensing applications in agricultural practices are comprehensively reliable and cover a multidisciplinary fundamental interest on a local as well as on a regional level. Significantly, vegetation indices are foremost essential remote sensing applications in agricultural activities related to vegetation and/or water, particularly in an arid environment. Adequate water resources management p…	[Bahrawi, J. A.; Elhag, M.] King Abdulaziz Univ, Dept Hydrol & Water Resources Management, Fac Meteorol Environm & Arid Land Agr, Jeddah 21589, Saudi Arabia	10	10.15666/aeer/1701_285303
292	Alyoubi, Bader A.	Clustering Analysis of Logistics Performance in Saudi Arabia: A Roadmap to Cloud Computing and IoT & Blockchain Solutions	Logistics Performance Index (LPI); Information and communication technology (ICT); Cloud Computing (CC); Internet of Things (IoT); K means method; Business logistics; Logistics information system	The exponential growth is observed in improving levels of logistics services globally. Since 2007, the World Bank has adopted a project to assess global logistics services through a measurement index that collects its data from countries' responses worldwide. Given the Kingdom of Saudi Arabia's geographical position, the Kingdom of Saudi Arabia (KSA) seeks to benefit from this position by diversi…	[Alyoubi, Bader A.] Univ Jeddah, Coll Business, Dept Management Informat Syst, Jeddah, Saudi Arabia	0	10.14456/ITJEMAST.2021.133
293	Elhag, Mohamed; Bahrawi, Jarbou A.	Sedimentation mapping in shallow shoreline of arid environments using active remote sensing data	Change detection; Sedimentation deposits; Sentinel-1; Wetlands habitats	The applications of remote sensing in monitoring land cover features are an essential tool of natural resources management schemes. The sedimentation mapping of shallow shorelines is insufficient using passive remote sensing images because of the image corrections and weather implications that need to be considered, while active remote sensing data can overcome the difficulties of the weather int…	[Elhag, Mohamed; Bahrawi, Jarbou A.] King Abdulaziz Univ, Dept Hydrol & Water Resources Management, Fac Meteorol Environm & Arid Land Agr, Jeddah 21589, Saudi Arabia	9	10.1007/s11069-019-03780-4
294	Allafta, Hadi; Opp, Christian	GIS-based multi-criteria analysis for flood prone areas mapping in the trans-boundary Shatt Al-Arab basin, Iraq-Iran	Flood hazard model; geographic information system; multi-criteria decision analysis; analytical hierarchy process; Shatt Al-Arab basin	Severe flood events in the trans-boundary Shatt Al-Arab basin (Iraq-Iran) claim hundreds of human lives and cause damage to the economy and environment. Therefore, developing a flood hazard model to recognize the basin's susceptible areas to flooding is important for decision makers for comprehensive flood risk management. The flood hazard map was prepared using geographical information systems (…	[Allafta, Hadi; Opp, Christian] Philipps Univ Marburg, Fac Geog, Marburg, Germany	12	10.1080/19475705.2021.1955755
295	Kassianidou, Vasiliki; Agapiou, Athos; Manning, Sturt W.	Reconstructing an ancient mining landscape: a multidisciplinary approach to copper mining at Skouriotissa, Cyprus	Cyprus; Skouriotissa; ancient mining; copper; archaeometallurgy; GIS	Extensively worked in antiquity, Skouriotissa remains the only active copper mine on the island of Cyprus. The modern, open-cast operation, however, has almost completely obliterated the earlier mining landscape. Here the authors report the results of investigations, including dating, of the ancient topography of the mine. They incorporate spatial data derived from archival sources, recent fieldw…	[Kassianidou, Vasiliki] Univ Cyprus, Archaeol Res Unit, Dept Hist & Archaeol, Nicosia, Cyprus; [Agapiou, Athos] Cyprus Univ Technol, Dept Civil Engn & Geomat, Nicosia, Cyprus; [Agapiou, Athos] Eratosthenes Ctr Excellence, Limassol, Cyprus; [Manning, Sturt W.] Cornell Univ, Dept Class, Ithaca, NY 14853 USA; [Manning, Sturt W.] Cornell Univ, Cornell Inst Archaeol & Mat Studies, Ithaca, NY 14853 USA…	4	10.15184/aqy.2021.33
296	Serdar, Mohammad Zaher; Ajjur, Salah Basem; Al-Ghamdi, Sami G.	Flood Susceptibility Assessment in Arid Areas: A Case Study of Qatar	flood susceptibility; multi-criteria decision analysis (MCDA); sensitivity analysis; Qatar	Over the past decade, the adverse impacts of climate change and excessive urbanization have contributed to several unfamiliar and costly floods in the Gulf Cooperation Council (GCC), especially in Qatar. With limited historical rainfall records and unprecedented precipitation intensities impacting the efficiency of hydrological models, the multi-criteria decision analysis (MCDA) presents a suitab…	[Serdar, Mohammad Zaher; Ajjur, Salah Basem; Al-Ghamdi, Sami G.] Hamad Bin Khalifa Univ, Qatar Fdn, Coll Sci & Engn, Div Sustainable Dev, POB 34110, Doha, Qatar	0	10.3390/su14159792
297	Boulila, Wadii; Sellami, Mokhtar; Driss, Maha; Al-Sarem, Mohammed; Safaei, Mahmood; Ghaleb, Fuad A.	RS-DCNN: A novel distributed convolutional-neural-networks based-approach for big remote-sensing image classification	Big data; Satellite images; Remote sensing; Deep leaning; Distributed convolutional-neural-networks; Image classification; Apache spark	Developments in remote sensing technology have led to a continuous increase in the volume of remote-sensing data, which can be qualified as big remote sensing data. A wide range of potential applications is using these data including land cover classification, regional planning, catastrophe prediction and management, and climate change estimation. Big remote sensing data are characterized by diff…	[Boulila, Wadii; Sellami, Mokhtar; Driss, Maha] Univ Manouba, Natl Sch Comp Sci, RIADI Lab, Manouba, Tunisia; [Boulila, Wadii; Driss, Maha; Al-Sarem, Mohammed] Taibah Univ, IS Dept, Coll Comp Sci & Engn, Medina, Saudi Arabia; [Safaei, Mahmood] Univ Kebangsaan Malaysia, Fac Informat Sci & Technol, Ctr Software Technol & Management, Kuala Lumpur, Malaysia; [Ghaleb, Fuad A.] Univ Teknol Malaysia, Sc…	36	10.1016/j.compag.2021.106014
298	Abdelouhed, Farah; Ahmed, Algouti; Abdellah, Algouti; Yassine, Baiddane; Mohammed, Ifkirne	Using GIS and remote sensing for the mapping of potential groundwater zones in fractured environments in the CHAOUIA-Morocco area	Groundwater; Potential area; AHP; Remote sensing; GIS; Chaouia; Morocco	The present study is a contribution to the effort of using new technologies (GIS and remote sensing) for the prospection of groundwater in fractured environments in the lower Chaouia region, which is characterized by the presence of nongeneralized water tables. Its main objective is to design a GIS prototype, coupled with the multi-criteria analysis AHP, as an efficient decision support tool for …	[Abdelouhed, Farah; Ahmed, Algouti; Abdellah, Algouti; Mohammed, Ifkirne] Univ Cadi Ayyad, Fac Sci Semlalia, Dept Geol Geosci Geotourism Nat Hazards 2GRNT, BP 2390, Marrakech 40000, Morocco; [Abdelouhed, Farah; Ahmed, Algouti; Abdellah, Algouti; Mohammed, Ifkirne] Univ Cadi Ayyad, Remote Sensing Lab, BP 2390, Marrakech 40000, Morocco; [Yassine, Baiddane] Hydraul Basin Agcy Bouregreg & Chaouia ABH…	5	10.1016/j.rsase.2021.100571
299	Bougherira, Abdeldjalil; Ghodbani, Tarik; Kouti, Abdelaziz	Contemporary geomorphic evolution of Falcon Cape sandy coastline (Oran, Algeria): geographical information system (GIS)-based approach	Sandy coastline; Geomorphic evolution; Anthropogenic pressure; Falcon Cape; GIS	This study focuses on the quantification and analysis of geomorphic changes along the sandy coast of Falcon Cape (north-west of Algeria) over a long period. This analysis concerns the processing of aerial photographs and satellite imagery from 1959 to 2018 (i.e., 59 years) and the topographic maps and digital elevation model (DEM) from 1934 to 2014 (i.e., 80 years). The evolution of this coast is…	[Bougherira, Abdeldjalil] Univ Abdelhamid Ibn Badis, Fac Sci Nat & Vie, Dept Sci Mer & Aquaculture, Lab Espace Geog & Amenagement Terr, Mostaganem, Algeria; [Ghodbani, Tarik; Kouti, Abdelaziz] Univ Oran 2 Mohamed Ben Ahmed, Fac Sci Terre & Univ, Dept Geog & Amenagement Terr, Lab Espace Geog & Amenagement Terr, Oran, Algeria	3	10.1007/s12517-020-05983-7
300	Farhadi, Hadi; Najafzadeh, Mohammad	Flood Risk Mapping by Remote Sensing Data and Random Forest Technique	Remote Sensing; Google Earth Engine; Random Forest; Flood Risk Mapping	Detecting effective parameters in flood occurrence is one of the most important issues that has drawn more attention in recent years. Remote Sensing (RS) and Geographical Information System (GIS) are two efficient ways to spatially predict Flood Risk Mapping (FRM). In this study, a web-based platform called the Google Earth Engine (GEE) (Google Company, Mountain View, CA, USA) was used to obtain …	[Farhadi, Hadi] KN Toosi Univ Technol, Fac Surveying Engn, Dept Photogrammetry & Remote Sensing, Tehran 1969764499, Iran; [Najafzadeh, Mohammad] Grad Univ Adv Technol, Fac Civil & Surveying Engn, Dept Water Engn, Kerman 7631885356, Iran	27	10.3390/w13213115
301	Yagmur, Nur; Bilgilioglu, Burhan Baha; Dervisoglu, Adalet; Musaoglu, Nebiye; Tanik, Aysegul	Long and short-term assessment of surface area changes in saline and freshwater lakes via remote sensing	freshwater lakes; remote sensing; saline lakes; sentinel 1; Turkey; water surface change	Advances in remote sensing technology enable monitoring and detection of these vulnerable water bodies that bear numerous functions and ecological services beyond their intended use. As such, valuable data and information may be provided for long and short-term analyses and stored in a database for future projections. This paper initially grouped 18 natural lakes of the Konya Closed Basin of Turk…	[Yagmur, Nur; Dervisoglu, Adalet; Musaoglu, Nebiye; Tanik, Aysegul] Istanbul Tech Univ, Civil Engn Fac, Geomat Engn Dept, TR-34469 Maslak, Istanbul, Turkey; [Bilgilioglu, Burhan Baha] Gumushane Univ, Fac Engn & Nat Sci, Geomat Engn Dept, Gumushane, Turkey	5	10.1111/wej.12608
302	Bentekhici, Nadjla; Bellal, Sid-Ahmed; Zegrar, Ahmed	Contribution of remote sensing and GIS to mapping the fire risk of Mediterranean forest case of the forest massif of Tlemcen (North-West Algeria)	Fire; Mediterranean forest; Risk; AHP model; GIS; Remote sensing	Forest fires are one of the major environmental problems that cause harmful economic and ecological damage. The Algerian forest and in particular the Tlemcen forest massif where the national park is located are very affected by the repetition and the danger of fires. We count 1600 fire starts recorded during the period from 1980 to 2015. This situation is influenced by the ecotourism status and t…	[Bentekhici, Nadjla; Zegrar, Ahmed] Algerian Space Agcy ASAL, Space Tech Ctr CTS, Earth Observat Dept, BP13, Arzew 31200, Algeria; [Bellal, Sid-Ahmed] Univ Oran 2, Fac Earth & Universe Sci, Dept Geog & Spatial Planning, Oran 31000, Algeria	10	10.1007/s11069-020-04191-6
303	Murad, Abdulkader; Faruque, Fazlay; Naji, Ammar; Tiwari, Alok	Using the location-allocation P-median model for optimising locations for health care centres in the city of Jeddah City, Saudi Arabia	Geographical information system; health centres; health demand; location-allocation; Jeddah; Saudi Arabia	Considering spatial accessibility of health services is a critical part in the planning and management of health services. There is evidence that poor geographical locations can obstruct prompt basic health care services to some population sections. We developed a location-allocation P-median model for health centres after analysing their sites, demand location of health services and the road net…	[Murad, Abdulkader; Naji, Ammar; Tiwari, Alok] King Abdulaziz Univ, Fac Architecture & Planning, Dept Urban & Reg Planning, Jeddah, Saudi Arabia; [Faruque, Fazlay] Univ Mississippi, Dept Prevent Med, Med Ctr, Jackson, MS USA	1	10.4081/gh.2021.1002
304	Tucker, Compton J.; Melocik, Katherine A.; Anyamba, Assaf; Linthicum, Kenneth J.; Fagbo, Shamsudeen F.; Small, Jennifer L.	Reanalysis of the 2000 Rift Valley fever outbreak in Southwestern Arabia		The first documented Rift Valley hemorrhagic fever outbreak in the Arabian Peninsula occurred in northwestern Yemen and southwestern Saudi Arabia from August 2000 to September 2001. This Rift Valley fever outbreak is unique because the virus was introduced into Arabia during or after the 1997-1998 East African outbreak and before August 2000, either by wind-blown infected mosquitos or by infected…	[Tucker, Compton J.; Melocik, Katherine A.; Anyamba, Assaf; Small, Jennifer L.] NASA, Earth Sci Div, Goddard Space Flight Ctr, Greenbelt, MD 20771 USA; [Linthicum, Kenneth J.] USDA, Ctr Med Agr & Vet Entomol, Gainesville, FL USA; [Fagbo, Shamsudeen F.] Natl Ctr Dis Prevent & Control, Execut Directorate Response & Surveillance, Hlth Unit, Riyadh, Saudi Arabia; [Fagbo, Shamsudeen F.] Nigerian Inst …	1	10.1371/journal.pone.0233279
305	Fu, Han; Fu, Bihong; Shi, Pilong; Zheng, Yuanyuan	International geological significance of the potential Al-Medina volcanic UNESCO Global Geopark Project in Saudi Arabia revealed from multi-satellite remote sensing data	Geoheritage; Al-Medina volcanic field; Late Quaternary; Scientific value and aesthetic appeal; Multi-source remote sensing data	UNESCO Global Geoparks should be of international geological significance in terms of their scientific quality, rarity, aesthetic appeal and tourism value. At least nine Cenozoic volcanic fields are developed in the western Saudi Arabia, with a total area of 180,000 km(2). In this paper, the geological and geomorphological features of these volcanic fields induced by the expansion of the Red Sea …	[Fu, Han; Fu, Bihong; Shi, Pilong] Chinese Acad Sci, Aerosp Informat Res Inst, Key Lab Digital Earth Sci, Beijing 100094, Peoples R China; [Fu, Han] Univ Chinese Acad Sci, Beijing 100049, Peoples R China; [Fu, Han] Beijing Inst Satellite Informat Engn, State Key Lab Space Ground Integrated Informat Te, Beijing 100029, Peoples R China; [Zheng, Yuanyuan] Chinese Acad Geol Sci, Beijing 100037, Peopl…	2	10.1186/s40494-021-00610-4
306	Benaissi, Lakhlifa; Tarek, Amraoui; Tobi, Adnane; Ibouh, Hassan; Zaid, Khadra; Elamari, Khalid; Hibti, Mohamed	Geological mapping and mining prospecting in the Aouli inlier (Eastern Meseta, Morocco) based on remote sensing and geographic information systems (GIS)	Remote sensing; GIS; Aouli inlier; Mining prospecting; Multi-criteria analysis	Landsat 8 Oli, ASTER, and Sentinel 2A satellite images processing was used to map geological formations, lineaments and hydrothermal alteration minerals in the Aouli inlier, as a case study to illustrate the application of digital images processing and Geographic Information System (GIS) in geological mapping and mining prospecting. Principal Component Analysis (PCA) applied to the Landsat images…	[Benaissi, Lakhlifa; Tobi, Adnane] Moulay Ismail Univ, Fac Sci & Tech, Dept Geosci, Lab Georessources, Errachidia 52000, Morocco; [Tarek, Amraoui; Ibouh, Hassan; Elamari, Khalid; Hibti, Mohamed] Cadi Ayyad Univ, Fac Sci & Technol Marrakesh, Dept Earth Sci, Lab Georessources & Civil Engn, Marrakech 40000, Morocco; [Zaid, Khadra] Mohamed First Univ, Fac Sci, Dept Earth Sci, Oujda 60000, Morocco	2	10.31035/cg2022035
307	Al-Bahrani, Hussein Shakir; Al-Rammahi, Ali Hussein; Al-Mamoori, Sohaib Kareem; Al-Maliki, Laheab A.; AL-Ansari, Nadhir	Groundwater detection and classification using remote sensing and GIS in Najaf, Iraq	Groundwater quality; Groundwater depth; Aqua detector; Remote sensing; GIS; WF-303 GH	Due to the shortage of fresh surface water caused by climate change, groundwater has become a vital water supply for household, agricultural, and industrial use. Alternative methods for determining groundwater depth, amount, and quality at a lower cost and less effort are critical. This study aims to determine the depth and kind of groundwater in Najaf City, Iraq, using Aqua detector remote sensi…	[Al-Bahrani, Hussein Shakir; Al-Rammahi, Ali Hussein] Univ Kufa, Fac Engn, Najaf, Iraq; [Al-Mamoori, Sohaib Kareem] Univ Kufa, Fac Phys Planning, Dept Environm Planning, Najaf, Iraq; [Al-Maliki, Laheab A.] Univ Kufa, Fac Phys Planning, Dept Reg Planning, Najaf, Iraq; [AL-Ansari, Nadhir] Lulea Univ Technol, Dept Civil Environm & Nat Resources Engn, Lulea, Sweden	0	10.1016/j.gsd.2022.100838
308	Al-Hemoud, Ali; Al-Dashti, Hassan; Al-Saleh, Abeer; Petrov, Peter; Malek, Mariam; Elhamoud, Ebrahim; Al-Khafaji, Sarhan; Li, Jing; Koutrakis, Petros; Doronzo, Domenico; Middleton, Nick	Dust storm ?hot spots? and Transport Pathways Affecting the Arabian Peninsula	Dust storms; MODIS; Empty quarter; Mesopotamia; Arabian peninsula	The Arabian Peninsula (AP), the largest peninsula in the world, contains 'hot spot' areas for intensive dust storms. Dust sources outside the AP can also represent 'hot spots' that heavily impact the AP. This study explores the source and transport pathways of severe dust storm events over the AP over nine years (2010-2018) using MODIS Aqua and Terra satellites (0.25-0.5 km/pxl resolution) combin…	[Al-Hemoud, Ali; Al-Saleh, Abeer; Petrov, Peter; Malek, Mariam] Kuwait Inst Sci Res, Environm & Life Sci Res Ctr, Crisis & Decis Support Program, POB 24885, Safat 13109, Kuwait; [Al-Dashti, Hassan] Directorate Gen Civil Aviat, Meteorol Dept, POB 35, Hawalli 32001, Kuwait; [Elhamoud, Ebrahim] Kuwait Univ, Fac Law, POB 5475, Safat 13055, Kuwait; [Al-Khafaji, Sarhan] Al Muthanna Univ, Geog Dept, Sam…	1	10.1016/j.jastp.2022.105932
309	Ghoussein, Youssra; Mhawej, Mario; Jaffal, Ali; Fadel, Ali; El Hourany, Roy; Faour, Ghaleb	Vulnerability assessment of the South-Lebanese coast: A GIS-based approach	Coastal Vulnerability Index (CVI); Sea level rise; GIS; Remote sensing; Mediterranean basin; Lebanon	The sea-level rise phenomenon affects several socio-economic and ecological aspects worldwide, particularly in terms of coastal erosion and saltwater intrusion. While the Mediterranean region is showing an increase vulnerability to the sea-level rise, in this study, we implement the Coastal Vulnerability Index (CVI), between 2005 and 2013, on the Southern Lebanese coast. The selection of this stu…	[Ghoussein, Youssra; Mhawej, Mario; Fadel, Ali; El Hourany, Roy; Faour, Ghaleb] Natl Council Sci Res, Natl Ctr Remote Sensing, POB 11-8281, Beirut 11072260, Lebanon; [Ghoussein, Youssra; Jaffal, Ali] Lebanese Univ, Fac Sci 1, Beirut, Lebanon	21	10.1016/j.ocecoaman.2018.03.028
310	Elbeih, Salwa F.	Evaluation of agricultural expansion areas in the Egyptian deserts: A review using remote sensing and GIS q	Egypt Vision 2030; Western Desert Agricultural Expansion areas; GIS and Remote Sensing; Criteria and constraints	Agricultural expansion areas in the Egyptian deserts are one of the main governmental inputs that increased during the last decade. Evaluation of such agricultural lands helps decision makers in strategic planning of future projects. The present review paper highlights recent research studies conducted to evaluate some of the newly agricultural expansion areas in the Egyptian deserts using Geogra…	[Elbeih, Salwa F.] Natl Author Remote Sensing & Space Sci NARSS, Engn Applicat & Water Div, Cairo, Egypt	4	10.1016/j.ejrs.2021.10.004
311	Colak, H. Ebru; Memisoglu, Tugba; Gercek, Yasin	Optimal site selection for solar photovoltaic (PV) power plants using GIS and AHP: A case study of Malatya Province, Turkey	Solar Photovoltaic (PV) Power Plant; Site Selection; Geographical Information Systems (GIS); Analytical Hierarchy Process (AHP); Malatya; Turkey	The importance of energy needs increases substantially with the effects of scientific developments, technological improvements and human population growth. Because of excessive consumption of non-renewable energy resources and rising expenses, the vast majority of nations are in constant search of new resources. In Turkey, electricity produced from solar energy systems plays a key role in supplyi…	[Colak, H. Ebru; Memisoglu, Tugba] Karadeniz Tech Univ, Fac Geomat Engn, Trabzon, Turkey; [Gercek, Yasin] Malatya Yesilyurt Municipal, Malatya, Turkey	112	10.1016/j.renene.2019.12.078
312	Al Shihi, Adel A.; Al Sadi, Abdullah M.; Deadman, Mike; Briddon, Rob W.; Shahid, Muhammad S.	Identification of a distinct strain of Cotton leaf curl Gezira virus infecting tomato in Oman	begomovirus; betasatellite; Cotton leaf curl Gezira virus; Solanum lycopersicum	Tomato (Solanum lycopersicum) plants exhibiting yellowing, curling and stunting symptoms were identified in fields of the Tawoos Agricultural Systems, in Al-Batinah in Oman. Cloning and sequencing of restriction endonuclease digested rolling circle amplified viral DNA identified a cotton begomovirus (family Geminiviridae) associated with the symptomatic tomato plants. Detailed analysis of complet…	[Al Shihi, Adel A.; Al Sadi, Abdullah M.; Deadman, Mike; Shahid, Muhammad S.] Sultan Qaboos Univ, Coll Agr & Marine Sci, Dept Crop Sci, Al Khoud, Oman; [Briddon, Rob W.] Natl Inst Biotechnol & Genet Engn, Agr Biotechnol Div, Faisalabad, Pakistan	4	10.1111/jph.12676
313	Hakdaoui, Sofia; Emran, Anas; Pradhan, Biswajeet; Qninba, Abdeljebbar; El Balla, Taoufik; Mfondoum, Alfred Homere Ngandam; Lee, Chang-Wook; Alamri, Abdullah M.	Assessing the Changes in the Moisture/Dryness of Water Cavity Surfaces in Imlili Sebkha in Southwestern Morocco by Using Machine Learning Classification in Google Earth Engine	Google Earth Engine; permanent salt water cavities change; remote sensing; Sebkha; southern Morocco	Imlili Sebkha is a stable and flat depression in southern Morocco that is more than 10 km long and almost 3 km wide. This region is mainly sandy, but its northern part holds permanent water pockets that contain fauna and flora despite their hypersaline water. Google Earth Engine (GEE) has revolutionized land monitoring analysis by allowing the use of satellite imagery and other datasets via cloud…	[Hakdaoui, Sofia; Emran, Anas] Mohamed V Univ, Earth Observat Dept, Geobiodivers & Nat Patrimony Lab, Geophys Nat Patrimony & Green Chem Res Ctr,Sci In, Av Ibn Batouta BP 703, Rabat 10106, Morocco; [Pradhan, Biswajeet] Univ Technol Sydney, Fac Engn & Informat Technol, Ctr Adv Modelling & Geospatial Informat Syst, Ultimo, NSW 2007, Australia; [Pradhan, Biswajeet] Sejong Univ, Dept Energy & Mineral…	1	10.3390/rs12010131
314	Alqurashi, Abdullah F.	Quantification of Urban Patterns and Processes through Space and Time Using Remote Sensing Data: A Comparative Study between Three Saudi Arabian Cities	urban growth; urban-growth patterns; urban-growth processes; Landsat; landscape metrics; Saudi Arabia	Saudi Arabia has developed rapidly over the last five decades in the wake of an extensive development programme implemented by the government throughout the entire country. Several previous studies have measured the extent and rate of urbanization in Saudi Arabian cities, but most of this research used only remote sensing data or a single index to explain urban growth patterns. This study used sa…	[Alqurashi, Abdullah F.] Umm Al Qura Univ, Dept Geog, Mecca 21955, Saudi Arabia	1	10.3390/su132212615
315	Zohar, Motti	A land without people? The GIScience approach to estimating the population of Ottoman Palestine towards the end of the 19th-century	GIScience; Ottoman Palestine; Palestine Exploration Fund maps; 19th century; Population	The question of the nature and extent of population in Ottoman Palestine towards the end of the 19th century (-1880) remains one of significant implications even today. Using the PEF (Palestine Exploration Fund) maps and employing GIScience (Geographic Information Science) approaches, the mapped settlements were extracted and inspected. Based on the population estimates of the PEF surveyors in th…	[Zohar, Motti] Univ Haifa, Dept Geog & Environm Studies, Abba Khoushy Ave 199, IL-3498838 Haifa, Israel	1	10.1016/j.apgeog.2022.102672
316	Manandhar, Prajowal; Marpu, Prashanth Reddy; Aung, Zeyar; Melgani, Farid	Towards Automatic Extraction and Updating of VGI-Based Road Networks Using Deep Learning	road extraction; road updating; VGI; CNN; segment connection	This work presents an approach to road network extraction in remote sensing images. In our earlier work, we worked on the extraction of the road network using a multi-agent approach guided by Volunteered Geographic Information (VGI). The limitation of this VGI-only approach is its inability to update the new road developments as it only follows the VGI. In this work, we employ a deep learning app…	[Manandhar, Prajowal; Marpu, Prashanth Reddy; Aung, Zeyar] Khalifa Univ, Dept Elect Engn & Comp Sci, POB 54224, Abu Dhabi, U Arab Emirates; [Melgani, Farid] Univ Trento, Dept Informat Engn & Comp Sci, Via Sommar 9, I-38123 Trento, Italy	12	10.3390/rs11091012
317	Malekshah, Mohammad Ali Gholi Nataj; Jahani, Davood; Mousavi, Seyed Ramazan; Ghadimvand, Nader Kohansal; Vaziri, Seyed Hamid	Identification of karstic zones using RS & GIS method, Fuzzy logic and AHP in Neka catchment, Mazandaran, Iran	AHP; Fuzzy logic; Iran; Karstic zones; Mazandaran; Neka catchment; Remote sensing and GIS	This study focuses on identifying zones and karstic phenomena using the RS & GIS method along with Fuzzy logic integration and the Hierarchical Analysis Process (AHP) in part of Neka catchment in Mazandaran province in the north of Iran. In this research, eight lithological factors, density and distance from the fractured lineaments, density and distance from the drainages, topographic slope, pre…	[Malekshah, Mohammad Ali Gholi Nataj; Jahani, Davood; Ghadimvand, Nader Kohansal; Vaziri, Seyed Hamid] Islamic Azad Univ, Dept Geol, North Tehran Branch, Tehran, Iran; [Mousavi, Seyed Ramazan] Sari Agr Sci & Nat Resources Univ, Fac Nat Resources, Dept Watershed Management, Mazandaran, Iran	0	10.46544/AMS.v27i3.10
318	Al-Ghobari, Hussein; Dewidar, Ahmed; Alataway, Abed	Estimation of Surface Water Runoff for a Semi-Arid Area Using RS and GIS-Based SCS-CN Method	GIS; rainfall-runoff; remote sensing; SCS-CN	The proper planning of storage structures, waterways, irrigation schemes, water harvesting, erosion control structures, and groundwater development strategies requires accurate estimation of surface runoff. However, hydrologists in Saudi Arabia face serious challenges, specifically due to the rare availability of surface runoff data. In this study, the soil conservation service-curve number (SCS-…	[Al-Ghobari, Hussein] King Saud Univ, Agr Engn Dept, POB 2460, Riyadh 11451, Saudi Arabia; [Dewidar, Ahmed; Alataway, Abed] King Saud Univ, Prince Sultan Inst Environm Water & Desert Res, Prince Sultan Bin Abdulaziz Int Prize Water Chair, POB 2460, Riyadh 11451, Saudi Arabia	21	10.3390/w12071924
319	Borna, Elham; Sadr, Maryam Kiani; Hosseini, Seyed Ahmad	Linking ground-satellite observations with HYSPLIT Back trajectory modeling to identify dust sources affecting Western Iran: A case study in Lorestan province	MODS; HYSPLIT; Long-range transport; Dust; Lorestan	Background: This study combined ground and satellite observations with the results of HYSPLIT model to identify the origin, transport, and deposition of sand and dust storms (SDSs) affecting Western Iran. Methods: Field-measured dust exposure data were obtained during 2000-2014 to analyze variability of dust concentration and dust intensity at annual, monthly, and daily scales. Remote sensing mea…	[Borna, Elham; Hosseini, Seyed Ahmad] Islamic Azad Univ, Dept Environm, Kermanshah Branch, Kermanshah, Iran; [Sadr, Maryam Kiani] Islamic Azad Univ, Coll Basic Sci, Dept Environm, Hamedan Branch, Hamadan, Hamadan, Iran	0	10.34172/EHEM.2021.11
320	Zaigham, Nayyer Alam; Aburizaiza, Omar Siraj; Mahar, Gohar Ali; Nayyar, Zeeshan Alam	Hydrogeologic assessment for groundwater prospects in Al-Abwa drainage basin, arid-terrain of Arabian Shield, Saudi Arabian Red Sea coastal belt	Hydrogeo-evaluation; Watershed and remote sensing analyses; Lineament density; Fault; fracture zone aquifers; Al-Abwa basin (Saudi Arabia)	Arid regions are considered the most vulnerable areas regarding the water crisis. Al-Abwa drainage basin, situated at western arid part of the Saudi Arabian Shield region, presents a complex hydrogeological setup along the Red Sea coastline. Historically, the groundwater was used to extract from shallow thin alluvial aquifers underlain by the basement rock terrains. With time, rapid increase in p…	[Zaigham, Nayyer Alam] GeoEnvoTechServices, Res Grp Geoscientists & Environmentalists, Karachi, Pakistan; [Aburizaiza, Omar Siraj] King Abdulaziz Univ, Unit Ain Zubaida & Groundwater Res, Jeddah, Saudi Arabia; [Mahar, Gohar Ali] Fed Urdu Univ, Dept Geog, Karachi, Pakistan; [Nayyar, Zeeshan Alam] Univ Karachi, Dept Appl Phys, Karachi, Pakistan	4	10.1007/s12517-020-05367-x
321	Bedoui, Chokri	Study of desertification sensitivity in Talh region (Central Tunisia) using remote sensing, GIS and the MEDALUS approach	Desertification sensitivity; GIS; Remote sensing; Medalus; Tunisia	BackgroundTunisia is one of countries most affected by desertification. Sustainability of its resources, particularly agricultural ones, is closely dependent on it. Studies have multiplied to understand this phenomenon and consequently try to reduce its consequences on society. In recent decades, attempts have been made to find methods of forecasting and predicting desertification. Today, with si…	[Bedoui, Chokri] Univ Sfax, Dept Geog, Sfax, Tunisia	6	10.1186/s40677-020-00148-w
322	Alhammad, Fawwaz Ali; Al-Weshah, Ghazi A.; Aljarodi, Abdullah	Governmental intervention and entrepreneurs' personal values: qualitative evidence from Saudi Arabia	governmental intervention; entrepreneurship; networking; nepotism; entrepreneurs' behaviour; Saudi Arabia	The purpose of this study is to fill a gap in our understanding of the governmental interventions (GIs) and entrepreneurs' personal values in a non-western setting namely, in Saudi Arabia. To that end, a case study was undertaken to better understand how Saudi entrepreneurship perceives their government's engagement with entrepreneurship, and how this may affect their personal values. Using theor…	[Alhammad, Fawwaz Ali] Al Balqa Appl Univ, Amman Coll Financial & Managerial Sci, Amman, Jordan; [Al-Weshah, Ghazi A.] Al Balqa Appl Univ, Fac Business, POB 19117, Al Salt, Jordan; [Aljarodi, Abdullah] Univ Business & Technol UBT, Coll Business Adm CBA, POB 33335, Jeddah 21448, Saudi Arabia	2	10.1504/MEJM.2021.111989
323	Braham, Massinissa; Boufekane, Abdelmadjid; Bourenane, Hamid; Amara, Baya Nait; Bensalem, Rabah; Oubaiche, El Hadi; Bouhadad, Youcef	Identification of groundwater potential zones using remote sensing, GIS, machine learning and electrical resistivity tomography techniques in Guelma basin, northeastern Algeria	Machine learning; groundwater potential; remote sensing; GIS; electrical resistivity tomography	In this research we assess and map groundwater potential in the Guelma Basin (northeastern Algeria) using an approach combining remote sensing, GIS, statistical and machine learning models. Four models were used including the frequency ratio model with both conventional (CFR) and modified (MFR) versions, the decision tree (DT), and the random forest (RF). For this purpose, firstly, thirteen hydro…	[Braham, Massinissa; Boufekane, Abdelmadjid] Univ Sci & Technol Houari Boumediene USTHB, Fac Earth Sci & Country Planning FSTGAT, Dept Geol, Geoenvironm Lab, Algiers, Algeria; [Braham, Massinissa; Bourenane, Hamid; Amara, Baya Nait; Bensalem, Rabah; Oubaiche, El Hadi; Bouhadad, Youcef] Natl Ctr Appl Res Earthquake Engn CGS, Algiers, Algeria	3	10.1080/10106049.2022.2063408
324	Abdelsattar, Amal; Hassan, Ali N.	Assessment of malaria resurgence vulnerability in Fayoum, Egypt Using Remote Sensing and GIS	Landscape epidemiology; Malaria; GIS; Remote sensing	Environmental and climate changes are potential drivers of the re-emergence of vector-borne diseases especially in areas where vectors are still prevailing. This situation is true for Fayoum governorate, Egypt, the last focus of malaria where vectors continue to breed. Thus, it is important to assess its vulnerability through understanding the underlying factors of malaria ecology at the time of …	[Abdelsattar, Amal] Prince Sultan Univ, Riyadh, Saudi Arabia; [Hassan, Ali N.] Ain Shams Univ, Inst Environm Studies & Res, Cairo, Egypt	6	10.1016/j.ejrs.2020.01.004
325	Al-Mansi, Ahmed M.; Sambas, Anas Z.; Abukaboos, Baleegh A.; Al Zahrani, Ahmed H.; Abdulaziz, Ahmed S.; Almasabi, Ali A.; Alkreda, Raed S.; Miller, Jeff	Satellite Tracking of Post-nesting Green Sea Turtles (Chelonia mydas) From Ras Baridi, Red Sea	satellite tracking; green turtle; Chelonia mydas; Red Sea; Ras Baridi	Identifying migratory pathways and linking nesting sites to foraging areas is essential for effective conservation management of migratory species, such as marine turtles. Post-nesting marine turtles disperse from their nesting sites to multiple foraging areas located from a few to hundreds of kilometers away. Over a six-year period 16 female green turtles (Chelonia mydas) were equipped with sate…	[Al-Mansi, Ahmed M.] Minist Environm Water & Agr, Riyadh, Saudi Arabia; [Sambas, Anas Z.; Abukaboos, Baleegh A.; Al Zahrani, Ahmed H.; Abdulaziz, Ahmed S.; Almasabi, Ali A.; Alkreda, Raed S.] Natl Ctr Wildlife, Riyadh, Saudi Arabia; [Miller, Jeff] Biol Res & Educ Consultants, Missoula, MT USA	3	10.3389/fmars.2021.758592
326	Abdel-Aziz, Yehia; Abdelaziz, A. M.; Tealib, S. K.; Attia, G. F.; Molotov, Igor; Schmalz, Sergei	First Optical Satellite Tracking Station (OSTS) at NRIAG-Egypt	Artificial satellite observations; Space debris; Optical telescope; Image processing	In March 2019 the first dedicated of optical observation of space debris and artificial satellites (Optical Satellites Tracking Station (OSTS)) in Egypt has been performed by National Research Institute of Astronomy and Geophysics (NRIAG) at Kottamia Observatory. The 0.28 m Telescope is used for tracking and surveying debris and operational satellites at Low Earth Orbit (LEO), High ellipse orbit …	[Abdel-Aziz, Yehia; Abdelaziz, A. M.; Tealib, S. K.; Attia, G. F.] Natl Res Inst Astron & Geophys, Cairo 11421, Egypt; [Molotov, Igor; Schmalz, Sergei] Russian Acad Sci, Keldysh Inst Appl Math, Moscow, Russia	4	10.1016/j.newast.2020.101361
327	Abdelkrim, Zohra; Nouibat, Brahim	Assessing flood exposure in informal neighbourhoods: a case study of Bou Saada, Algeria	informal; neighbourhoods; flood risk; physical fragility; exposure; geographical information system; GIS; analytical hierarchy process; AHP; impermeability; intensity; Bou Saada; Algeria	The informal neighbourhoods of Bou Saada are at prone to flooding; with a population of about 60,958 people with an area of 446.24 hectares, spread over eight neighbourhoods. These neighbourhoods are affected by more intense precipitation and short duration, causing economic damage and even loss of human life. The main objective of this study was to determine the degree of exposure to flood risk …	[Abdelkrim, Zohra; Nouibat, Brahim] Mohamed Boudiaf Univ, Inst Management Urban Tech, Msila, Algeria; [Abdelkrim, Zohra; Nouibat, Brahim] VESDD, Lab City Environm Soc & Sustainable Dev, Msila, Algeria; [Abdelkrim, Zohra; Nouibat, Brahim] UMB MSila, Siege De La Wilaya De Ms 28000, Msila, Algeria	0	10.1504/IJHST.2022.119249
328	Han, Hongyin; Han, Chengshan; Huang, Liang; Lan, Taiji; Xue, Xucheng	Irradiance Restoration Based Shadow Compensation Approach for High Resolution Multispectral Satellite Remote Sensing Images	irradiance restoration; shadow compensation; WorldView-3; multispectral satellite remote sensing image	Numerous applications are hindered by shadows in high resolution satellite remote sensing images, like image classification, target recognition and change detection. In order to improve remote sensing image utilization, significant importance appears for restoring surface feature information under shadow regions. Problems inevitably occur for current shadow compensation methods in processing high…	[Han, Hongyin; Han, Chengshan; Huang, Liang; Lan, Taiji; Xue, Xucheng] Chinese Acad Sci, Changchun Inst Opt Fine Mech & Phys, Changchun 130033, Peoples R China; [Han, Hongyin; Huang, Liang] Univ Chinese Acad Sci, Beijing 100049, Peoples R China	4	10.3390/s20216053
329	Ali, Md Arfan; Assiri, Mazen	Analysis of AOD from MODIS-Merged DT-DB Products Over the Arabian Peninsula	AOD; Atmospheric aerosol; Remote sensing; Arabian Peninsula	The satellite-based aerosol estimation has attracted immense scientific attention in a multiplicity of applications related to global warming, climate change, and air pollution research globally. Numerous aerosols from widespread deserts across the Arabian Peninsula have a significant function in the regional climate and air quality. The aim of this study is to analyze the spatiotemporal variatio…	[Ali, Md Arfan; Assiri, Mazen] King Abdulaziz Univ, Ctr Excellence Climate Change Res, Dept Meteorol, Jeddah 21589, Saudi Arabia	26	10.1007/s41748-019-00108-x
330	Brunazzi, Alice; Scaglione, Davide; Talini, Rebecca Fiorella; Miculan, Mara; Magni, Federica; Poland, Jesse; Pe, Mario Enrico; Brandolini, Andrea; Dell'Acqua, Matteo	Molecular diversity and landscape genomics of the crop wild relative Triticum urartu across the Fertile Crescent	Wheat; adaptation; landscape genetics; GIS; GWAS; GBS; RAD; Triticum urartu; Triticum dicoccoides; wild emmer	Modern plant breeding can benefit from the allelic variation that exists in natural populations of crop wild relatives that evolved under natural selection in varying pedoclimatic conditions. In this study, next-generation sequencing was used to generate 1.3 million genome-wide single nucleotide polymorphisms (SNPs) on ex situ collections of Triticum urartu L., the wild donor of the A(u) subgenom…	[Brunazzi, Alice; Talini, Rebecca Fiorella; Miculan, Mara; Pe, Mario Enrico; Dell'Acqua, Matteo] Scuola Superiore St Anna, Inst Life Sci, Pzza Martiri Liberta 33, I-56127 Pisa, Italy; [Scaglione, Davide; Magni, Federica] Inst Appl Gen, Via J Linussio 51 ZIU, I-33100 Udine, Italy; [Poland, Jesse] Kansas State Univ, Dept Plant Pathol, Wheat Genet Resource Ctr, 4024 Throckmorton PSC, Manhattan, KS 6…	22	10.1111/tpj.13888
331	Nazzal, Yousef; Howari, Fares M.; Iqbal, Jibran; Ahmed, Izrar; Orm, Nadine Bou; Yousef, Ahmad	Investigating aquifer vulnerability and pollution risk employing modified DRASTIC model and GIS techniques in Liwa area, United Arab Emirates	Recharge potential; Arid region; Groundwater pollution; Aquifer vulnerability; DRASTIC model; Sensitivity analyses; Liwa; United Arab Emirates	Anthropogenic activities and land use types can have a significant impact on the groundwater vulnerability especially in areas with agricultural activities such as Liwa area in the United Arab Emirates (UAE). In the study area, the groundwater resources over-exploited and are prone to quality deterioration due to the urbanization and growth in the agriculture sector. In the present study, various…	[Nazzal, Yousef; Howari, Fares M.; Iqbal, Jibran; Orm, Nadine Bou] Zayed Univ, Coll Nat & Hlth Sci, POB 144534, Abu Dhabi, U Arab Emirates; [Ahmed, Izrar] Dubai Municipal, Environm Dept, Dubai, U Arab Emirates	21	10.1016/j.gsd.2019.02.006
332	Pershin, Sergey M.; Katsnelson, Boris G.; Grishin, Mikhail Ya; Lednev, Vasily N.; Zavozin, Vladimir A.; Ostrovsky, Ilia	Laser Remote Sensing of Lake Kinneret by Compact Fluorescence LiDAR	laser remote sensing; Lake Kinneret; algal blooming; water quality monitoring; chlorophyll-a fluorescence	Harmful algal blooms in freshwater reservoirs became a steady phenomenon in recent decades, so instruments for monitoring water quality in real time are of high importance. Modern satellite remote sensing is a powerful technique for mapping large areas but cannot provide depth-resolved data on algal concentrations. As an alternative to satellite techniques, laser remote sensing is a perspective t…	[Pershin, Sergey M.; Grishin, Mikhail Ya; Lednev, Vasily N.; Zavozin, Vladimir A.] Russian Acad Sci, Prokhorov Gen Phys Inst, Moscow 119991, Russia; [Katsnelson, Boris G.] Univ Haifa, Dept Marine Geosci, IL-3498838 Haifa, Israel; [Ostrovsky, Ilia] Israel Oceanog & Limnol Res, Kinneret Limnol Lab, IL-1495001 Migdal, Israel	0	10.3390/s22197307
333	Lawrence, Christopher	Heralds of global transparency: Remote sensing, nuclear fuel-cycle facilities, and the modularity of imagination	co-production; Iranian nuclear program; nuclear nonproliferation; remote sensing; sociotechnical imaginaries	How has commercial remote sensing influenced the framing of public narratives about nuclear programs and weapons of mass destruction? This article examines an early and formative case: In 2002, a Washington-based nongovernmental organization used commercial satellite images to publicly identify the Natanz nuclear facility in Iran. The episode helped inaugurate the 'Iran nuclear crisis' as we have…	[Lawrence, Christopher] Harvard Univ, John F Kennedy Sch Govt, Program Sci Technol & Soc, 79 JFK St, Cambridge, MA 02138 USA	6	10.1177/0306312719879769
334	Abdelkader, Mahmoud M.; Al-Amoud, Ahmed, I; El Alfy, Mohamed; El-Feky, Ahmed; Saber, Mohamed	Assessment of flash flood hazard based on morphometric aspects and rainfall-runoff modeling in Wadi Nisah, central Saudi Arabia	Geographic information system (GIS); Watershed modeling system (WMS); Morphometric analysis; And flash flood hazard; HEC-HMS; And wadi system	The lack of monitoring and observational data is hampering the assessment of flash flood hazard in arid environments. This study forecasts and investigates flash floods hazards in Wadi Nisah basin in the central region of Saudi Arabia. An integrated approach of Geographic Information System (GIS), Remote Sensing (RS), and Watershed Modeling System (WMS) is presented to determine the flash flood h…	[Abdelkader, Mahmoud M.; Al-Amoud, Ahmed, I; El-Feky, Ahmed] King Saud Univ, Coll Food & Agr Sci, Agr Engn Dept, Riyadh 11451, Saudi Arabia; [El Alfy, Mohamed] King Saud Univ, Prince Sultan Inst Environm Water & Desert Res, CPSIPW, Riyadh, Saudi Arabia; [El Alfy, Mohamed] Mansoura Univ, Fac Sci, Dept Geol, Mansoura 35516, Egypt; [Saber, Mohamed] Kyoto Univ, Water Resources Res Ctr, DPRI, Uji, Kyo…	4	10.1016/j.rsase.2021.100562
335	Shatnawi, Nawras; Abu Qdais, Hani	Mapping urban land surface temperature using remote sensing techniques and artificial neural network modelling		The objective of the present study is to monitor and predict the changes in land surface temperature (LST) in the North of Jordan during the Period 2000 to 2016. Due to political instability in the nearby countries Syria and Iraq, Jordan has witnessed increased influxes of refugees, starting from the year 2003, which has been led to the urban expansion in the area that reflected on the climatic c…	[Shatnawi, Nawras] Al Balqa Appl Univ, Surveying & Geomat Engn Dept, Al Salt 19117, Jordan; [Abu Qdais, Hani] Jordan Univ Sci & Technol, Civil Engn Dept, Irbid, Jordan	22	10.1080/01431161.2018.1557792
336	Elfadaly, Abdelaziz; Eldein, Ayaat Shams; Lasaponara, Rosa	Cultural Heritage Management Using Remote Sensing Data and GIS Techniques around the Archaeological Area of Ancient Jeddah in Jeddah City, Saudi Arabia	supervised classification; heritage management; satellite imagery; spatial statistical	Historic Jeddah is located on the eastern shore of the Red Sea. Historic Jeddah was designated as a UNESCO world heritage site in 2014. The new urban development for the city of Jeddah has resulted in different spatial patterns. The southern part of Jeddah city falls within the moderate zone, because this area is well developed in regard to infrastructure with rainstorm and sewage networks. The m…	[Elfadaly, Abdelaziz; Lasaponara, Rosa] Italian Natl Res Council, I-85050 Potenza, Italy; [Elfadaly, Abdelaziz] Natl Author Remote Sensing & Space Sci, Dept Populat Studies & Archaeol, Cairo 1564, Egypt; [Eldein, Ayaat Shams] Univ Kafrelsheikh, Fac Arts, Dept Archaeol, Kafr Al Sheikh 1501, Egypt	15	10.3390/su12010240
337	Aliewi, Amjad; Bhandary, Harish; Al-Qallaf, Habib; Sabarathinam, Chidambaram; Al-Kandari, Jasim	Assessment of the groundwater yield and sustainability of the transboundary Dibdibba aquifer using numerical modelling approach	Hydrogeology; Recharge components; Submarine groundwater discharge; Numerical modeling	This study investigates the sustainable yield of a shared/regional aquifer that covers a hydrogeological basin, Dibdibba Delta Aquifer Basin (DDAB). The aquifer extends over an area of 60,000 km(2) in three countries: Iraq, Kuwait, and Saudi Arabia. The groundwater resources of DDAB are used by these countries for agricultural and industrial purposes. The study aims at assessing the sustainable y…	[Aliewi, Amjad; Bhandary, Harish; Al-Qallaf, Habib; Sabarathinam, Chidambaram; Al-Kandari, Jasim] Kuwait Inst Sci Res, Water Res Ctr, Kuwait, Kuwait	2	10.1016/j.gsd.2021.100678
338	Han, Hongyin; Han, Chengshan; Lan, Taiji; Huang, Liang; Hu, Changhong; Xue, Xucheng	Automatic Shadow Detection for Multispectral Satellite Remote Sensing Images in Invariant Color Spaces	shadow detection; invariant color space; high-resolution multispectral satellite remote sensing image; threshold; WorldView-3; WorldView-2	Shadow often results in difficulties for subsequent image applications of multispectral satellite remote sensing images, like object recognition and change detection. With continuous improvement in both spatial and spectral resolutions of satellite remote sensing images, a more serious impact occurs on satellite remote sensing image interpretation due to the existence of shadow. Though various sh…	[Han, Hongyin; Han, Chengshan; Lan, Taiji; Huang, Liang; Hu, Changhong; Xue, Xucheng] Chinese Acad Sci, Changchun Inst Opt Fine Mech & Phys, Changchun 130033, Peoples R China; [Han, Hongyin; Huang, Liang] Univ Chinese Acad Sci, Beijing 100049, Peoples R China	9	10.3390/app10186467
339	Karimi, Hazhir; Soffianian, Alireza; Seifi, Sadri; Pourmanafi, Saeid; Ramin, Hadi	Evaluating optimal sites for combined-cycle power plants using GIS: comparison of two aggregation methods in Iran	GIS; multi-criteria evaluation; weighted linear combination; fuzzy logic; energy planning for Iran	This study aims to use an integration of GIS and multi-criteria evaluation for combined-cycle power plant site selection and compares two aggregation methods for Iran. The information layers of the criteria are prepared in the GIS environment and then the layers standardised using fuzzy functions in IDRISI. All layers are combined using two conventional methods of fuzzy logic and weighted linear …	[Karimi, Hazhir] Univ Zakho, Fac Sci, Dept Environm Sci, Duhok, Kurdistan Regio, Iraq; [Karimi, Hazhir] Univ Zakho, Ctr Appl Remote Sensing & GIS, Duhok, Kurdistan Regio, Iraq; [Soffianian, Alireza; Seifi, Sadri; Pourmanafi, Saeid] Isfahan Univ Technol, Dept Nat Resources, Esfahan, Iran; [Ramin, Hadi] Univ Saskatchewan, Dept Mech Engn, Saskatoon, SK, Canada	2	10.1080/14786451.2019.1659271
340	Nicoll, K. A.; Readle, A.; Al Kamali, A.; Harrison, R. G.	Surface atmospheric electric field variability at a desert site	Potential gradient; United Arab Emirates; Sea breeze; Convection; Dust electrification	Measurements of atmospheric electrical variables in arid desert environments provide a route to assessing dust charging, which affects dust lofting; satellite remote sensing of dust particles; long range transport of elevated dust layers; and may also influence rain droplet size. This paper analyses a new dataset of atmospheric electric field (or Potential Gradient, PG) measurements from an arid …	[Nicoll, K. A.; Readle, A.; Al Kamali, A.; Harrison, R. G.] Univ Reading, Dept Meteorol, Reading, England; [Readle, A.] Met Off, Exeter, England; [Al Kamali, A.] Natl Ctr Meteorol, Dept Res Dev & Training, Abu Dhabi, U Arab Emirates	0	10.1016/j.jastp.2022.105977
341	Lupa, Michal; Adamek, Katarzyna; Lesniak, Andrzej; Prsek, Jaroslav	Application of satellite remote sensing methods in mineral prospecting in Kosovo, area of Selac	remote sensing; GIS; geology; mineral mapping; Landsat 8	Traditional methods of mineral exploration are mainly based on very expensive drilling and seismic methods. The proposed approach assumes the preliminary recognition of prospecting areas using satellite remote sensing methods. Maps of mineral groups created using Landsat 8 images can narrow the search area, thereby reducing the costs of geological exploration during mineral prospecting. This stud…	[Lupa, Michal; Adamek, Katarzyna; Lesniak, Andrzej; Prsek, Jaroslav] AGH Univ Sci & Technol, Krakow, Poland	1	10.24425/gsm.2020.132554
342	Addas, Abdullah; Goldblatt, Ran; Rubinyi, Steven	Utilizing Remotely Sensed Observations to Estimate the Urban Heat Island Effect at a Local Scale: Case Study of a University Campus	remote sensing; Landsat; land surface temperature; urban heat island; sustainable planning	The urban heat island (UHI) effect has become a significant focus of research in today's era of climate change, and a key consideration for the next generation of urban planning focused on green and livable cities. UHI has traditionally been measured using in situ data and ground-based measurements. However, with the increased availability of satellite-based thermal observations of the Earth, rem…	[Addas, Abdullah] King Abdulaziz Univ, Fac Architecture & Planning, Landscape Architecture Dept, POB 80210, Jeddah 21589, Saudi Arabia; [Goldblatt, Ran] New Light Technol Inc, Washington, DC 20005 USA; [Rubinyi, Steven] World Bank, Urban Disaster Risk Management Resilience & Land, 1818 H St NW, Washington, DC 20433 USA	13	10.3390/land9060191
343	Dag, Serhat; Akgun, Aykut; Kaya, Ayberk; Alemdag, Selcuk; Bostanci, Hasan Tahsin	Medium scale earthflow susceptibility modelling by remote sensing and geographical information systems based multivariate statistics approach: an example from Northeastern Turkey	Earthflow; Susceptibility; Logistic regression; Remote sensing; Turkey	The aim of the present study was to produce an earthflow susceptibility map for the city center and environs of the province of Rize located at the Northeastern part of Turkey. The study area is the rainiest region of Turkey, and due to the triggering effect of precipitation earthflows are frequently observed in and around the study area. Besides this point, weathered rock units and steep topogra…	[Dag, Serhat; Alemdag, Selcuk] Gumushane Univ, Fac Engn & Nat Sci, Dept Geol Engn, TR-29100 Gumushane, Turkey; [Akgun, Aykut] Karadeniz Tech Univ, Fac Engn, Dept Geol Engn, TR-61100 Trabzon, Turkey; [Kaya, Ayberk] Recep Tayyip Erdogan Univ, Fac Engn & Architecture, Dept Civil Engn, TR-53100 Rize, Turkey; [Bostanci, Hasan Tahsin] Gumushane Univ, Fac Engn & Nat Sci, Dept Geomat Engn, TR-29100 Gumus…	6	10.1007/s12665-020-09217-7
344	Branch, Oliver; Behrendt, Andreas; Alnayef, Osama; Spath, Florian; Schwitalla, Thomas; Temimi, Marouane; Weston, Michael; Farrah, Sufian; AL YAzEEDI, Omar; Tampi, Siddharth; DE Waal, Karel; Wulfmeyer, Volker	Observing the pre-convective environment and convection initiation with Doppler Lidar and cloud radar in the Al Hajar Mountains of the United Arab Emirates	Convection initiation; mountains; remote sensing; Doppler lidar; cloud radar; arid	In this study, we present multi-season measurements from a remote mountain peak observatory in the United Arab Emirates (UAE). During the campaign, Doppler lidar and cloud radar were employed using coordinated scan patterns, to study seedable convective clouds, and identify pre-convection initiation clear-air signatures. The instruments were employed for approximately two years in an extreme envi…	[Branch, Oliver; Behrendt, Andreas; Alnayef, Osama; Spath, Florian; Schwitalla, Thomas; Wulfmeyer, Volker] Univ Hohenheim, Inst Phys & Meteorol, Garbenstr 30, D-70593 Stuttgart, Germany; [Temimi, Marouane] Stevens Inst Technol, Dept Civil Environm & Ocean Engn CEOE, Hoboken, NJ 07030 USA; [Weston, Michael] Khalifa Univ Sci & Technol, Abu Dhabi, U Arab Emirates; [Farrah, Sufian; AL YAzEEDI, Omar; …	0	10.1127/metz/2021/1100
345	Cagliyan, Ayse; Dagli, Dundar	Monitoring Land Use Land Cover Changes and Modelling of Urban Growth Using a Future Land Use Simulation Model (FLUS) in Diyarbakir, Turkey	land use change; urban growth; urban simulation; FLUS model; Diyarbakir	Land use and land cover (LULC) change corresponds to the greatest transformations that occur on the earth's surface under physical, human and socio-economic geographical conditions. Increasing demand for residential and agricultural lands has been transforming all land classes and this should be investigated in the long term. In this study, we aim to determine LULC change and land use simulation …	[Cagliyan, Ayse; Dagli, Dundar] Firat Univ, Fac Humanity & Social Sci, Geog Dept, TR-23150 Elazig, Turkey	3	10.3390/su14159180
346	Tobi, Adnane; Essalhi, Mourad; El Azmi, Daoud; Bouzekraoui, Mostapha; El Ouaragli, Bilal	Remote sensing and GIS-based mining prospection of Fe- Mn-Pb oxide mineralisation at Jbel Skindis (Eastern High Atlas, Morocco).	Remote sensing; Fe-Mn-Pb deposits; Multicriteria analysis; Mineral exploration; Eastern High-Atlas	In recent years, remote sensing has had a prominent place in mineral exploration programs given its potential to identify alteration minerals, such as clay and hydroxyl minerals. Those minerals represent significant guides to mineral deposits considering their potential to host valuable concentrations of base metal elements. This work focuses on Fe-Mn-Pb mineral deposits within the Jbel Skindis a…	[Tobi, Adnane; Essalhi, Mourad; Bouzekraoui, Mostapha] Moulay Ismail Univ, Fac Sci & Tech, Appl Geol Lab, MB 509, Errachidia, Morocco; [Tobi, Adnane; El Azmi, Daoud; El Ouaragli, Bilal] Africorp Min Co, Africorp Consortium Grp, Casablanca, Morocco; [Bouzekraoui, Mostapha] Mohammed V Univ Rabat, Fac Sci, Geosci Water Environm Lab, Rabat, Morocco	0	10.3989/egeol.44641.614
347	Koc, Cengiz; Bayazit, Yildirim; Ozgul, Selami Yurdan	Investigation of theoretical hydroelectric potential with GIS-based model in Buyuk Menderes Basin, Turkey	Buyuk Menderes Basin; hydropower potential; Geographical Information System; water; energy	In this study, using a Geographical Information System (GIS) based model method, locations having theoretical hydroelectric energy potential were identified in the Buyuk Menderes basin, one of Turkey's largest basins. According to the installed power potential on the examined basin, 33 sites below 10 MW, 57 sites between 10 and 50 MW, 4 sites between 50 and 100 MW, and 1 site over 100 MW were fou…	[Koc, Cengiz] Mugla Sitki Kocman Univ, Fac Architecture, Dept City & Reg Planning, Mugla, Turkey; [Bayazit, Yildirim; Ozgul, Selami Yurdan] Bilecik Seyh Edebali Univ, Dept Civil Engn, Bilecik, Turkey	0	10.1080/14786451.2022.2147525
348	Ahmadlou, Mohammad; Al-Fugara, A'kif; Al-Shabeeb, Abdel Rahman; Arora, Aman; Al-Adamat, Rida; Quoc Bao Pham; Al-Ansari, Nadhir; Nguyen Thi Thuy Linh; Sajedi, Hedieh	Flood susceptibility mapping and assessment using a novel deep learning model combining multilayer perceptron and autoencoder neural networks	deep learning; flood susceptibility; GIS; mapping; multilayer perceptron	Floods are one of the most destructive natural disasters causing financial damages and casualties every year worldwide. Recently, the combination of data-driven techniques with remote sensing (RS) and geographical information systems (GIS) has been widely used by researchers for flood susceptibility mapping. This study presents a novel hybrid model combining the multilayer perceptron (MLP) and au…	[Ahmadlou, Mohammad] KN Toosi Univ Technol, Geodesy & Geomat Fac, GIS Dept, Tehran, Iran; [Al-Fugara, A'kif] Al al Bayt Univ, Fac Engn, Dept Surveying Engn, Mafraq, Jordan; [Al-Shabeeb, Abdel Rahman; Al-Adamat, Rida] Al al Bayt Univ, Inst Earth & Environm Sci, Dept GIS & Remote Sensing, Mafraq, Jordan; [Arora, Aman] Fac Nat Sci, Dept Geog, New Delhi, India; [Quoc Bao Pham] Ton Duc Thang Univ, Env…	38	10.1111/jfr3.12683
349	Hassaan, Mahmoud A.; Hassan, Ahmed; Al-Dashti, Hassan	GIS-based suitability analysis for siting solar power plants in Kuwait	Solar energy; Multi criteria analysis; GIS; Kuwait	Renewable energy sources are most preferable compared to fossil fuels as they are usually free, widely available with limited or no environmental impacts. Seeking for clean energy is essential for Kuwait and other Gulf states in order to: ensure more diversified energy portfolio for their domestic economies, shift towards green economies and attain sustainable development. This study aims to prov…	[Hassaan, Mahmoud A.] Alexandria Univ, Inst Grad Studies & Res, 163 Horreya Ave, Alexandria, Egypt; [Hassan, Ahmed] MOE, Kuwait, Kuwait; [Al-Dashti, Hassan] Directorate Gen Civil Aviat, Dept Meteorol, Kuwait, Kuwait	13	10.1016/j.ejrs.2020.11.004
350	Sargazi, Shahnaz; Mokhtari, Mahdi; Ehrampoush, Mohammad Hassan; Almodaresi, Seyed Ali; Sargazi, Hossein; Sarhadi, Masome	The application of geographical information system (GIS) approach for assessment of groundwater quality of Zahedan city, Sistan and Baluchestan Province, Iran	Groundwater quality index (GQI); Geographical information system (GIS); Gibbs diagram	The chemical analysis of groundwater samples in 29 well in the Zahedan, Sistan and Baluchestan Province, southeast of Iran was evaluated to determine the hydro-chemical processes and assessment of groundwater quality. In present study the Geographic Information System (GIS) approach was used for Groundwater Quality Index(GQI). The value of this index was reported to be in the average range 48.21%…	[Sargazi, Shahnaz; Mokhtari, Mahdi; Ehrampoush, Mohammad Hassan] Shahid Sadoughi Univ Med Sci, Environm Sci & Technol Res Ctr, Sch Publ Hlth, Dept Environm Hlth Engn, Yazd, Iran; [Sargazi, Shahnaz] Zahedan Univ Med Sci, Hlth Promot Res Ctr, Zahedan, Iran; [Almodaresi, Seyed Ali] Islamic Azad Univ, GIS & RS Dept, Yazd Branch, Hesabi Blv, Safaeie, Yazd, Iran; [Sargazi, Hossein] Gorgan Univ Agr Sci …	5	10.1016/j.gsd.2020.100509
351	Saadoud, Djouher; Hassani, Mohamed; Martin Peinado, Francisco Jose; Said Guettouche, Mohamed	Application of fuzzy logic approach for wind erosion hazard mapping in Laghouat region (Algeria) using remote sensing and GIS	Wind erosion; Fuzzy logic; GIS; Remote sensing; Hazard; Laghouat	Wind erosion is one of the most serious environmental problems in Algeria that threatens human activities and socio-economic development. The main goal of this study is to apply a fuzzy logic approach to wind erosion sensitivity mapping in the Laghouat region, Algeria. Six causative factors, obtained by applying fuzzy membership functions to each used parameter, are considered: soil, vegetation c…	[Saadoud, Djouher; Said Guettouche, Mohamed] USTHB, Fac Earth Sci Geog & Terr Planning, BP 32, Algiers 16111, Algeria; [Hassani, Mohamed] Ctr Res Astron Astrophys & Geophys, Algiers, Algeria; [Martin Peinado, Francisco Jose] Univ Granada, Dept Soil Sci, Fac Sci, Campus Fuentenueva S-N, E-18001 Granada, Spain	18	10.1016/j.aeolia.2018.01.002
352	Ibrahem, Abeer; Koubaily, Emad; Thabeet, Ali	Assessment of suitable habitat of the natural regeneration C. Libani A. Richard in Slenfeh (Syria)	Cedrus libani; Natural regeneration; Habitat suitability; Syria; Slenfeh	This study evaluated the habitat suitability for the natural regeneration of C. libani A. Richard in the Cedar and Fire Reserve in Slenfeh region of Syria. The satellite imagery was used to generate spatial and forest structure data and spectral indices pertaining to different variables viz., dominant land cover, distance from mature Cedar trees, distance from Broad Leaved trees, distance from fo…	[Ibrahem, Abeer] Tishreen Univ, Fac Agr, Dept Forestry & Environm, Latakia, Syria; [Koubaily, Emad] Tishreen Univ, Dept Ecol & Forestry, Latakia, Syria; [Thabeet, Ali] Aleppo Univ, Dept Ecol & Forestry, Aleppo, Syria	1	10.1016/j.ejrs.2020.06.004
353	Khzr, Bakhtiar Osman; Ibrahim, Gaylan Rasul Faqe; Hamid, Ariean Ali; Ail, Shwan Ahmad	Runoff estimation using SCS-CN and GIS techniques in the Sulaymaniyah sub-basin of the Kurdistan region of Iraq	Soil conservation service; Curve number; Runoff; GIS; Remote sensing	The need for conserving water rises as the resource becomes scarcer. The most essential step in order to manage this resource is to estimate watershed runoff. Runoff and rainfall are the main two sources that maintain ground water and recharge it. Hydrologists in the Kurdistan Region face the challenge of unavailability of data (most watersheds in the area are ungauged) or inaccurate data. The su…	[Ibrahim, Gaylan Rasul Faqe; Ail, Shwan Ahmad] Soran Univ, Fac Arts, Dept Geog, Soran 44001, Erbil, Iraq; [Ibrahim, Gaylan Rasul Faqe; Hamid, Ariean Ali] Univ Halabja, Dept Geog, Coll Human Sci, Halabja 46006, Iraq; [Khzr, Bakhtiar Osman] Univ Raparin, Dept Geog, Coll Humanities, Raparin 46012, Iraq	4	10.1007/s10668-021-01549-z
354	Gharbi, Ameur; Haddadi, Smail	Application of the mobile GIS for the improvement of the knowledge and the management of the road network	Mobile GIS; Wireless communication; Real time; Road data; Management; Road network	With the aim of improving the traditional method of collecting road data and knowledge and management of the road network in Algeria, an application of mobile geographical information systems (GIS) was constructed using a whole of solutions (PostgreSQL, PostGIS, QGIS, IntraMaps Roam, QGIS Cloud). This application allows the input of road data (pavement degradation, state of drainage systems, stat…	[Gharbi, Ameur; Haddadi, Smail] USTHB, LEEGO Lab, Fac Civil Engn, Algiers, Algeria	2	10.1007/s12518-019-00279-2
355	Parsian, Saeid; Amani, Meisam; Moghimi, Armin; Ghorbanian, Arsalan; Mahdavi, Sahel	Flood Hazard Mapping Using Fuzzy Logic, Analytical Hierarchy Process, and Multi-Source Geospatial Datasets	flood hazard; remote sensing; Geographic Information System (GIS); Analytical Hierarchical Process (AHP); fuzzy; Sentinel-1; Iran	Iran is among the driest countries in the world, where many natural hazards, such as floods, frequently occur. This study introduces a straightforward flood hazard assessment approach using remote sensing datasets and Geographic Information Systems (GIS) environment in an area located in the western part of Iran. Multiple GIS and remote sensing datasets, including Digital Elevation Model (DEM), s…	[Parsian, Saeid] Univ Lethbridge, Dept Geog & Environm, Lethbridge, AB T1K 3M4, Canada; [Amani, Meisam; Mahdavi, Sahel] Wood Environm & Infrastruct Solut, Ottawa, ON K2E 7L5, Canada; [Moghimi, Armin; Ghorbanian, Arsalan] KN Toosi Univ Technol, Geomat Engn Fac, Dept Photogrammetry & Remote Sensing, Tehran 1996715433, Iran	8	10.3390/rs13234761
356	Kolios, Stavros; Mitrakos, Stavros; Stylios, Chrysostomos	Detection of areas susceptible to land degradation in Cyprus using remote sensed data and environmental quality indices	Cyprus Island; environmental index; GIS; land degradation; remote sensed data	This study is an effort to adapt the general principles, methodological tools, and equations of a widely used Mediterranean desertification and land use approach (MEDALUS approach) in order to detect environmental sensitive areas susceptible for land degradation in Cyprus. For this scope, different remote sensed data and products (Landsat multispectral imagery and ASTER Digital Elevation Model) w…	[Kolios, Stavros; Mitrakos, Stavros] Open Univ Cyprus, Fac Pure & Appl Sci, CY-2252 Latsia, Cyprus; [Kolios, Stavros] Univ Ioannina, Dept Phys, Lab Meteorol, Ioannina, Greece; [Stylios, Chrysostomos] Technol & Educ Inst Epirus, Dept Comp Engn, Fac Appl Technol, Arta, Greece	7	10.1002/ldr.3024
357	Hueneburg, Laura; Hoelzmann, Philipp; Knitter, Daniel; Teichert, Bernd; Richter, Christiane; Luethgens, Christopher; Alsaud, Abdullah S.; Luciani, Marta	Living at the wadi - integrating geomorphology and archaeology at the oasis of Qurayyah (NW Arabia)	Geoarchaeology; geomorphological map; water management strategies; Bronze Age; early Iron Age; NW Arabia; remote sensing	The archaeological site Qurayyah, situated in the NW of the Tabuk Province of Saudi Arabia, has been repeatedly described as one of the largest and most significant oases of Northwestern Arabia. Human occupation in the oasis started at least from the early Holocene and continued to the Nabatean, Roman and late Byzantine period. The hydrologically favored position results from its specific geomorp…	[Hueneburg, Laura; Hoelzmann, Philipp] Free Univ Berlin, Inst Geog Sci, Phys Geog, Malteser Str 74-100, D-12249 Berlin, Germany; [Knitter, Daniel] Christian Albrechts Univ Kiel, Dept Geog Phys Geog Landscape Ecol & Geoinformat, Kiel, Germany; [Teichert, Bernd; Richter, Christiane] Univ Appl Sci Dresden, Fac Spatial Informat, Dresden, Germany; [Luethgens, Christopher] Univ Nat Resources & Life Sci…	10	10.1080/17445647.2019.1576068
358	Yagoub, M. M.; AlSumaiti, Tareefa S.; Ebrahim, Latifa; Ahmed, Yaqein; Abdulla, Rauda	Pattern of Water Use at the United Arab Emirates University	water use; UAE University; GIS; public awareness; survey	In this study, indoor water use at the United Arab Emirates University (UAEU) was assessed for three years (2016, 2017, and 2018). A geographic information system (GIS) was employed to determine where water use is high within the university, when and why water is used, who uses it, and how to minimize its usage. Diverse data were employed to elucidate the broad patterns of university water use. I…	[Yagoub, M. M.; AlSumaiti, Tareefa S.; Ebrahim, Latifa; Ahmed, Yaqein; Abdulla, Rauda] United Arab Emirates Univ, Coll Humanities & Social Sci, Dept Geog & Urban Sustainabil, POB 15551, Al Ain, U Arab Emirates	3	10.3390/w11122652
359	Mallick, Javed; Shivhare, Vikash; Singh, Chander Kumar; Al Subih, Majed	Prioritizing Watershed Restoration, Management, and Development Based on Geo-Morphometric Analysis in Asir Region of Saudi Arabia Using Geospatial Technology	morphometry; sub-watershed; prioritization; Asir Province; GIS	The groundwater resource in the Kingdom of Saudi Arabia is a non-renewable resource. Geographical information system and remote sensing are proven to be an efficient tool for locating water harvesting and recharge structures by prioritization of sub-watersheds through morphometric analysis. In this study, the watershed prioritization in Asir Province has been assessed by linear, aerial, and relie…	[Mallick, Javed] King Khalid Univ, Coll Engn, Dept Civil Engn, Abha, Saudi Arabia; [Shivhare, Vikash] Quantela Inc, Dept Data Sci & Engn, Bengaluru, India; [Singh, Chander Kumar] TERI Sch Adv Studies, Dept Energy & Environm, New Delhi, India; [Al Subih, Majed] King Khalid Univ, Coll Engn, Dept Civil Engn, Abha, Saudi Arabia	0	10.15244/pjoes/142158
360	Tapete, Deodato; Cigna, Francesca	Detection of Archaeological Looting from Space: Methods, Achievements and Challenges	looting; archaeological remote sensing; change detection; feature extraction; pattern recognition; SAR; VHR optical; WordView-2; Sentinel-2; COSMO-SkyMed	Illegal excavations in archaeological heritage sites (namely looting) are a global phenomenon. Satellite images are nowadays massively used by archaeologists to systematically document sites affected by looting. In parallel, remote sensing scientists are increasingly developing processing methods with a certain degree of automation to quantify looting using satellite imagery. To capture the state…	[Tapete, Deodato; Cigna, Francesca] Italian Space Agcy ASI, Via Politecn Snc, I-00133 Rome, Italy	28	10.3390/rs11202389
361	Abdekareem, Mohamed; Al-Arifi, Nasir; Abdalla, Fathy; Mansour, Abbas; El-Baz, Farouk	Fusion of Remote Sensing Data Using GIS-Based AHP-Weighted Overlay Techniques for Groundwater Sustainability in Arid Regions	remote sensing; GIS; modeling; groundwater; arid regions; Wadi El-Tarfa	Remote sensing and GIS approaches have provided valuable information on modeling water resources, particularly in arid regions. The Sahara of North Africa, which is one of the driest regions on Earth, experienced several pluvial conditions in the past that could have stored significant amounts of groundwater. Thus, harvesting the stored water by revealing the groundwater prospective zones (GWPZs)…	[Abdekareem, Mohamed; Abdalla, Fathy; Mansour, Abbas] South Valley Univ, Geol Dept, Qena 83523, Egypt; [Abdekareem, Mohamed] South Valley Univ, Remote Sensing Lab, Qena 83523, Egypt; [Al-Arifi, Nasir] King Saud Univ, Geol & Geophys Dept, Chair Nat Hazards & Mineral Resources, Riyadh 11451, Saudi Arabia; [Abdalla, Fathy] King Saud Univ, Sci Res Chairs Program, Riyadh 11451, Saudi Arabia; [El-Baz, …	4	10.3390/su14137871
362	Al-Awadhi, Talal; Mansour, Shawky; Hereher, Mohamed	Assessment of coastal sensitivity to non-eustatic sea level rise: a case study on Muscat coast-Sultanate of Oman	CSI; Muscat; Tsunami; Remote sensing; GIS	Muscat metropolitan area holds the major urban masses and capital investments in Oman. The shoreline significantly varies in its geomorphology, slope, width, land use, and ecosystems. As tsunamis and tropical cyclones in the Indian Ocean are frequent, coastal inundation by sweater is inevitable and losses of lives, infrastructures, and ecosystems are expected. The current study attempts to assess…	[Al-Awadhi, Talal; Mansour, Shawky; Hereher, Mohamed] Sultan Qaboos Univ, Geog Dept, Coll Arts & Social Sci, Muscat, Oman; [Mansour, Shawky] Alexandria Univ, Dept Geog, Fac Arts, Alexandria, Egypt; [Mansour, Shawky] Alexandria Univ, GIS, Fac Arts, Alexandria, Egypt; [Hereher, Mohamed] Damietta Univ, Fac Sci, Dept Environm Sci, New Damietta, Egypt	3	10.1007/s12517-020-05321-x
363	Boland, Christopher R. J.; Burwell, Bruce O.	Ranking and mapping the high conservation priority bird species of Saudi Arabia	Asir Magpie; Asir Mountains; conservation priority; GIS; Saudi Arabia; threatened species	One of the challenges facing conservation biologists and land managers is to determine which species in the biota should receive conservation priority. This is particularly challenging in regions with comparatively little baseline ecological data, such as the Arabian Peninsula. Here we create a list of high conservation priority species for the birds of Saudi Arabia using objective criteria. In t…	[Boland, Christopher R. J.] Saudi Aramco, Environm Protect Dept, Dhahran, Saudi Arabia; [Burwell, Bruce O.] Saudi Aramco, Operat Excellence Dept, Dhahran, Saudi Arabia	3	10.5751/ACE-01705-150218
364	Abdelouhed, Farah; Ahmed, Algouti; Abdellah, Algouti; Mohammed, Ifkirne	Lineament mapping in the Ikniouen area (Eastern Anti-Atlas, Morocco) using Landsat-8 Oli and SRTM data	Eastern Anti Atlas Morocco; Ikniouen; Remote sensing; SRTM data; Landsat-8 OLI; GIS; Automatic lineament extraction	The present work focuses on the use of remote sensing techniques and Geographical Information Systems (GIS), to Automatic extraction and geospatial analysis of lineaments, in the district of Ikniouen located in the eastern Moroccan Anti Atlas. To achieve this objective, we relied on the processing of Landsat-8 OLI spectral bands and SRTM data covering the study site. In the first instance, essent…	[Abdelouhed, Farah; Ahmed, Algouti; Abdellah, Algouti; Mohammed, Ifkirne] Univ Cadi Ayyad, Dept Geol, Fac Sci Semlalia, Geosci Geotourism Nat Hazards & Remote Sensing La, BP 2390, Marrakech 40000, Morocco	5	10.1016/j.rsase.2021.100606
365	Li, Jing; Garshick, Eric; Hart, Jaime E.; Li, Longxiang; Shi, Liuhua; Al-Hemoud, Ali; Huang, Shaodan; Koutrakis, Petros	Estimation of ambient PM2.5 in Iraq and Kuwait from 2001 to 2018 using machine learning and remote sensing	PM2.5; Aerosol optical depth (AOD); Visibility; High resolution; Exposure	Iraq and Kuwait are in a region of the world known to be impacted by high levels of fine particulate matter (PM2.5) attributable to sources that include desert dust and ambient pollution, but historically have had limited pollution monitoring networks. The inability to assess PM2.5 concentrations have limited the assessment of the health impact of these exposures, both in the native populations a…	[Li, Jing; Hart, Jaime E.; Li, Longxiang; Shi, Liuhua; Huang, Shaodan; Koutrakis, Petros] Harvard TH Chan Sch Publ Hlth, Dept Environm Hlth, Boston, MA 02115 USA; [Garshick, Eric] VA Boston Healthcare Syst, Pulm Allergy Sleep & Crit Care Med Sect, Med Serv, Boston, MA 02132 USA; [Garshick, Eric; Hart, Jaime E.] Brigham & Womens Hosp, Dept Med, Channing Div Network Med, 75 Francis St, Boston, MA 0…	28	10.1016/j.envint.2021.106445
366	Ul-Haq, Z.; Batool, S. A.; Tariq, S.; Rana, A. D.; Mahmood, K.; Chaudhary, M. N.; Naeem, M. A.	TEMPORAL AND SPATIAL VARIATIONS OF NO 2 OVER SAUDI ARABIA AND IDENTIFICATION OF MAJOR HOTSPOT AREAS DURING 2005-2014 BY USING SATELLITE DATA	tropospheric NO2; OMI; spatiotemporal analysis; Saudi Arabia; hotspots	The present study was designed to analyze the concentration of tropospheric NO2 over Saudi Arabia for a decade from 2005-2014 based on observations from satellite borne Ozone Monitoring Instrument (OMI). The spatial analysis has identified two hotspots: Jeddah and Riyadh. The result of temporal analysis shows increase of 1.45%, 3.15% and 3.10% per year over Saudi Arabia, Jeddah and Riyadh respect…	[Ul-Haq, Z.; Batool, S. A.; Tariq, S.; Rana, A. D.; Mahmood, K.] Univ Punjab, Dept Space Sci, Remote Sensing & GIS Grp, Lahore, Pakistan; [Chaudhary, M. N.] Univ Punjab, Coll Earth & Environm Sci, Lahore, Pakistan; [Naeem, M. A.] Univ Punjab, Dept Elect Engn, Lahore, Pakistan	0	10.15666/aeer/1605_57575770
367	Mohsen, Ahmed; Elshemy, Mohamed; Zeidan, Bakenaz	Water quality monitoring of Lake Burullus (Egypt) using Landsat satellite imageries	Remote sensing; Water Quality Assessment; Carlson TSI; Lake Burullus; Landsat; ENVI 5; 1; Geographic Information System (GIS)	Lake Burullus is one of the most important coastal lakes in Egypt, as it participates with a considerable amount of fish yield in Egypt. Despite its importance, it is considered as a vulnerable lake, since it is subjected to significant environmental changes caused by various anthropogenic activities. Severe deterioration of its water quality status, as well as a decrease in its water area, has b…	[Mohsen, Ahmed; Elshemy, Mohamed; Zeidan, Bakenaz] Tanta Univ, Fac Engn, Tanta, Egypt; [Elshemy, Mohamed] Al Baha Univ, Fac Engn, Al Baha, Saudi Arabia	7	10.1007/s11356-020-11765-1
368	Kaya, Ilgi Atay; Gorgun, Esra Kut	Land use and land cover change monitoring in Bandirma (Turkey) using remote sensing and geographic information systems	Land use and land cover change (LULCC); Remote sensing; Geographic information systems; Accuracy assessment; Image processing	There is a growing scholarly interest in monitoring and assessment of the impacts of land use and land cover changes (LULCC) on the environment. Recent technological developments and tools of geographic information systems (GIS) and remote sensing (RS) facilitate the researches on this interest. This research aims at monitoring LULCC in Bandirma, Turkey over 30 years. This research utilizes GIS a…	[Kaya, Ilgi Atay; Gorgun, Esra Kut] Dokuz Eylul Univ, Fac Architecture, Dept City & Reg Planning, Izmir, Turkey	13	10.1007/s10661-020-08411-1
369	Soroush, Mehrnoush; Mehrtash, Alireza; Khazraee, Emad; Ur, Jason A.	Deep Learning in Archaeological Remote Sensing: Automated Qanat Detection in the Kurdistan Region of Iraq	remote sensing; archaeology; qanat; karez; deep learning; convolutional neural networks (CNNs); image segmentation; CORONA; Kurdistan Region of Iraq (KRG)	In this paper, we report the results of our work on automated detection of qanat shafts on the Cold War-era CORONA Satellite Imagery. The increasing quantity of air and space-borne imagery available to archaeologists and the advances in computational science have created an emerging interest in automated archaeological detection. Traditional pattern recognition methods proved to have limited appl…	[Soroush, Mehrnoush] Harvard Univ, Ctr Geog Anal, Cambridge, MA 02138 USA; [Mehrtash, Alireza] Harvard Med Sch, Boston, MA 02115 USA; [Mehrtash, Alireza] Harvard Univ, Univ British Columbia, Boston, MA 02115 USA; [Khazraee, Emad] Indeed Inc, San Francisco, CA 94105 USA; [Ur, Jason A.] Harvard Univ, Anthropol Dept, Cambridge, MA 02138 USA	32	10.3390/rs12030500
370	Souissi, Dhekra; Msaddek, Mohamed Haythem; Zouhri, Lahcen; Chenini, Ismail; El May, Moufida; Dlala, Mahmoud	Mapping groundwater recharge potential zones in arid region using GIS and Landsat approaches, southeast Tunisia	GIS; remote sensing; SRTM; MCDM; artificial recharge; arid zone	The rapid growth of population and agricultural and industrial activities has caused an increase in demand on the Jeffara aquifers of Gabes (southeast Tunisia). In fact, the over-pumping of this aquifer system has resulted in water-level declines ranging from 0.25 to 1 m/year during the past three decades. The aim of this study is to identify favourable artificial recharge sites of this aquifer s…	[Souissi, Dhekra; Msaddek, Mohamed Haythem; Chenini, Ismail; El May, Moufida; Dlala, Mahmoud] Univ Tunis El Manar, Fac Sci Tunis, Paleoenvironm Geomat & Risques Geol, UR13ES26, Tunis, Tunisia; [Zouhri, Lahcen] Inst Polytech UniLasalle, AGHYLE, Beauvais, France	47	10.1080/02626667.2017.1414383
371	Hamimi, Zakaria; Abdelkareem, Mohamed; Fowler, Abdel-Rahman; Younis, Mohammed H.; Matsah, Mohammed; Abdalla, Fathy	Remote sensing and structural studies of the Central Asir Shear Zone, Western Arabian Shield: Implications for the late Neoproterozoic E-W Gondwana assembly	Central Asir Shear Zone; Structural analysis; Arabian Shield; Asir terrane; East African Orogen	The Central Asir Shear Zone (CASZ) is a N- to NNE-oriented inhomogeneous strain zone parallel to the Nabitah shear belt in southern Saudi Arabia. It is -200 km long and 20 km wide, and traverses the Asir terrane. The deformed terrains in the vicinity of the CASZ have experienced a prolonged history involving three successive phases of deformation: arc-collision, dextral transpression and sinistra…	[Hamimi, Zakaria] Benha Univ, Fac Sci, Geol Dept, Banha 13518, Egypt; [Abdelkareem, Mohamed; Abdalla, Fathy] South Valley Univ, Geol Dept, Qena 83523, Egypt; [Fowler, Abdel-Rahman] United Arab Emirates Univ, Geol Dept, Al Ain, U Arab Emirates; [Younis, Mohammed H.] Aswan Univ, Geol Dept, Fac Sci, Aswan 81528, Egypt; [Matsah, Mohammed] King Abdulaziz Univ, Dept Struct Geol & Remote Sensing, Fac Ea…	2	10.1016/j.jseaes.2021.104782
372	Pourhashemi, Sima; Asadi, Mohammad Ali Zangane; Boroughani, Mahdi; Azadi, Hossein	Mapping of dust source susceptibility by remote sensing and machine learning techniques (case study: Iran-Iraq border)	Dust storm; Multivariate adaptive regression spline (MARS); Random forest (RF); Logistic regression (LR)	A dust storm is a major environmental problem affecting many arid regions worldwide. The novel contribution of this study is combining indicators extracted from RS- and statistic-based predictive models to spatial mapping of land susceptibility to dust emissions in a very important dust source area in the borders of Iran and Iraq (Khuzestan province in Iran and Al-Basrah and Maysan provinces in I…	[Pourhashemi, Sima; Asadi, Mohammad Ali Zangane] Hakim Sabzevari Univ, Dept Geog, Sabzevar, Iran; [Boroughani, Mahdi] Hakim Sabzevari Univ, Res Ctr Geosci & Social Studies, Sabzevar, Iran; [Azadi, Hossein] Univ Ghent, Dept Geog, Ghent, Belgium	0	10.1007/s11356-022-23982-x
373	Hussein, Sabri; Abdelkareem, Mohamed; Hussein, Raafat; Askalany, Mohamed	Using remote sensing data for predicting potential areas to flash flood hazards and water resources	Remote sensing; Flash flood; SRTM; Egypt	This article discussed the utilizing of active microwave and visible/Near-IR (VNIR) remote sensing data for flash flood prediction and proposing solutions to monito such event and protect people and infrastructures. The radar and VNIR data provided the excellent approaches for presenting hydrological and drainage system information. Shuttle Radar Topography Mission (SRTM) data provided quantitati…	[Hussein, Sabri; Abdelkareem, Mohamed; Hussein, Raafat; Askalany, Mohamed] South Valley Univ, Geol Dept, Qena 83523, Egypt; [Abdelkareem, Mohamed] South Valley Univ, Remote Sensing Lab, Qena 83523, Egypt	7	10.1016/j.rsase.2019.100254
374	Akbarzadeh, Kamran; Saghafipour, Abedin; Jesri, Nahid; Karami-Jooshin, Moharram; Arzamani, Koroush; Hazratian, Teymour; Kordshouli, Razieh Shabani; Afshar, Abbas Aghaei	Spatial Distribution of Necrophagous Flies of Infraorder Muscomorpha in Iran Using Geographical Information System	Diptera; myiasis agent; fly diversity; true flies	Medically important flies that majority of them are classified to synanthropic flies can be mechanical vectors for some of contagious diseases to human and many animals. Also some species of their larvae are cause of myiasis in human and livestock animals. The aim of this study was to determine the geographical distribution of medically important flies in Iran using Geographical Information Syste…	[Akbarzadeh, Kamran; Arzamani, Koroush; Kordshouli, Razieh Shabani] Univ Tehran Med Sci, Dept Med Entomol & Vector Control, Sch Publ Hlth, Tehran, Iran; [Saghafipour, Abedin] Qom Univ Med Sci, Fac Hlth, Dept Publ Hlth, Qom, Iran; [Jesri, Nahid] Qom Univ Med Sci, Res Ctr Environm Pollutants, Qom, Iran; [Karami-Jooshin, Moharram] Qom Univ Med Sci, Qom Prov Hlth Ctr, Qom, Iran; [Hazratian, Teymour] …	10	10.1093/jme/tjy098
375	Sherif, M. M.; Ebraheem, A. M.; Al Mulla, M. M.; Shetty, A., V	New system for the assessment of annual groundwater recharge from rainfall in the United Arab Emirates	Groundwater recharge; Recharge potential; Water table fluctuation; GIS; Water management	In this study, the first groundwater recharge map for United Arab Emirates (UAE) was developed using the recharge potential and water table fluctuation methods. Recharge potential estimates were made using information about infiltration rate, soil type, ground slope, geological and hydrogeological factors, and the availability of rainfall harvesting infrastructure and were validated by measuremen…	[Sherif, M. M.; Shetty, A., V] United Arab Emirates Univ, Natl Water Ctr, Al Ain, U Arab Emirates; [Sherif, M. M.] United Arab Emirates Univ, Coll Engn, Civil & Environm Engn Dept, POB 15551, Al Ain, U Arab Emirates; [Ebraheem, A. M.] Assiut Univ, Geol Dept, Assiut, Egypt; [Al Mulla, M. M.] Minist Energy & Water, Dept Water Resources, Dubai, U Arab Emirates	6	10.1007/s12665-018-7591-3
376	Issa, Salem; Dahy, Basam; Saleous, Nazmi; Ksiksi, Taoufik	Carbon stock assessment of date palm using remote sensing coupled with field-based measurements in Abu Dhabi (United Arab Emirates)		This study aims at developing a remote sensing based model to estimate carbon stock (CS) in date palm plantations in the United Arab Emirates (UAE). Data from Landsat 8 OLI were used to assess the correlation between spectral reflectance and different vegetation indices on one side, and aboveground biomass (AGB) derived from ground measurements on the other. AGB and CS (ton ha(-1)) were estimated…	[Issa, Salem; Dahy, Basam] United Arab Emirates Univ, Dept Geol, Al Ain, U Arab Emirates; [Saleous, Nazmi] United Arab Emirates Univ, Dept Geog, Al Ain, U Arab Emirates; [Ksiksi, Taoufik] United Arab Emirates Univ, Dept Biol, Al Ain, U Arab Emirates	9	10.1080/01431161.2019.1602795
377	Inglis, Robyn H.; Fanning, Patricia C.; Stone, Abi; Barfod, Dan N.; Sinclair, Anthony; Chang, Hsing-Chung; Alsharekh, Abdullah M.; Bailey, Geoff	Paleolithic artifact deposits at Wadi Dabsa, Saudi Arabia: A multiscalar geoarchaeological approach to building an interpretative framework	geoarchaeology; geomorphology; landscape archaeology; Paleolithic; remote sensing; Saudi Arabia	Surface artifacts dominate the archaeological record of arid landscapes, particularly the Saharo-Arabian belt, a pivotal region in dispersals out of Africa. Discarded by hominins, these artifacts are key to understanding past landscape use and dispersals, yet behavioral interpretation of present-day artifact distributions cannot be carried out without understanding how geomorphological processes …	[Inglis, Robyn H.; Bailey, Geoff] Univ York, Dept Archaeol, York YO1 7EP, N Yorkshire, England; [Inglis, Robyn H.; Fanning, Patricia C.; Chang, Hsing-Chung] Macquarie Univ, Dept Environm Sci, Sydney, NSW, Australia; [Stone, Abi] Univ Manchester, Dept Geog, Manchester, Lancs, England; [Barfod, Dan N.] Scottish Univ Environm Res Ctr, NERC Argon Isotope Facil, Glasgow, Lanark, Scotland; [Sinclair, A…	2	10.1002/gea.21723
378	Madani, Ahmed; Niyazi, Burhan; Elfakharani, Abdelhamid; Osman, Helmy	The Effects of Structural Elements on Groundwater of Wadi Yalamlam, Saudi Arabia Using Integration of Remote Sensing and Airborne Magnetic Survey	Remote sensing; Airborne magnetic survey; Dykes; Fractures; Groundwater; Wadi Yalamlam; Western Saudi Arabia	The present study aimed to develop an integrated approach that utilized field geology, remote sensing and airborne magnetic data to identify the Quaternary aquifers impounded by dykes and explain the dykes/lineaments relationship and their effects on the storage and flow of the groundwater of Sadiyah sub-basin, lower part of Wadi Yalamlam basin, Western Arabian Shield, Saudi Arabia. Field visits …	[Madani, Ahmed] Cairo Univ, Fac Sci, Dept Geol, Giza, Egypt; [Niyazi, Burhan] King Abdulaziz Univ, Water Res Ctr, Jeddah, Saudi Arabia; [Niyazi, Burhan] King Abdulaziz Univ, Fac Meteorol Environm & Arid Land Agr, Jeddah, Saudi Arabia; [Elfakharani, Abdelhamid] King Abdulaziz Univ, Fac Earth Sci, Jeddah, Saudi Arabia; [Elfakharani, Abdelhamid] Aswan Univ, Fac Sci, Geol Dept, Aswan, Egypt; [Osman, …	3	10.1007/s41748-019-00091-3
379	Alzghoul, Maysoon; Al-husban, Yusra	Rainwater harvesting and storage in Asir, Kingdom of Saudi Arabia, using spatial modeling and geographic information systems	Hyper-arid land; Site selection; Land use/land cover; Water resources; Asir region; Saudi Arabia	This article focuses on selecting and determining optimum sites for indigenous rainwater harvesting (RWH) in the Asir region in the Kingdom of Saudi Arabia. The three biophysical factors chosen are slope percentage, rainfall, and soil texture. In addition to seven socio-economic constraints, various other parameters included in the analysis are the distance to the drainage network, road networks,…	[Alzghoul, Maysoon] King Khalid Univ, Fac Human Sci, Dept Geog RS & GIS Applicat Hydrol, Abha, Saudi Arabia; [Al-husban, Yusra] Univ Jordan, Fac Arts, Dept Geog, Amman, Jordan	0	10.5004/dwt.2021.27531
380	Amoli, Abdolreza Ansari; Aghighi, Hossein; Lopez-Baeza, Ernesto	Drought Risk Evaluation in Iran by Using Geospatial Technologies	drought risk maps; exposure to drought; hazard quantification; remote sensing; vulnerability to drought	A drought risk map has been developed at the national scale by using remote-sensing satellite data over Iran by combining output layers resulting from three main components of a risk-evaluation procedure including Hazard Quantification (HQ), Vulnerability Assessment (VA) and Identification of Elements at Risk (IER) in a GIS environment. In this respect, Drought Severity (DS) was calculated by usi…	[Amoli, Abdolreza Ansari] Iranian Space Agcy, Remote Sensing & GIS Dept, 34 Sayeh St,Vali Asr Ave, Tehran 1967734114, Iran; [Amoli, Abdolreza Ansari; Lopez-Baeza, Ernesto] Univ Valencia, Fac Phys, Earth Phys & Thermodynam Dept, Environm Remote Sensing Grp Climatol Satellites, Valencia 46100, Spain; [Aghighi, Hossein] Shahid Beheshti Univ, Fac Earth Sci, Ctr Remote Sensing & GIS Res, Tehran 198396…	1	10.3390/rs14133096
381	Al-Bilbisi, Hussam	Spatial Monitoring of Urban Expansion Using Satellite Remote Sensing Images: A Case Study of Amman City, Jordan	Amman; urban expansion; Landsat; remote sensing; Jordan	Amman, the capital city of Jordan, faces urbanization challenges and lacks reliable data for urban planning. This study is aimed at assessing, monitoring, and mapping urban land cover using multitemporal Landsat satellite images. Four different land use/cover maps were produced; periods of over ten years between 1987 and 2017 (i.e., in 1987, 1997, 2007, and 2017) were used to evaluate and analyze…	[Al-Bilbisi, Hussam] Univ Jordan, Dept Geog, Amman 11942, Jordan	18	10.3390/su11082260
382	Henaish, Ahmed; Kharbish, Sherif; Zamzam, Sara	STRUCTURAL CONTROLS ON DRAINAGE PATTERN USING INTEGRATION OF REMOTE SENSING AND STRUCTURAL DATA: INSIGHTS FROM CAIRO-SUEZ PROVINCE, EGYPT	Structural control; Remote sensing; Drainage pattern; Cairo-Suez Province; Sedimentation; Geographic information system (GIS)	The Cairo-Suez Province (CSP) is one of the highly deformed settings in northern Egypt that includes a complex structures and drainage network. The scope of this paper is to present the results of investigation as how far can geological structures control and/or affect the distribution of drainage networks based on insights from several selected sites along CSP. High resolution satellite images a…	[Henaish, Ahmed; Zamzam, Sara] Zagazig Univ, Fac Sci, Dept Geol, Zagazig 44519, Egypt; [Kharbish, Sherif] Suez Univ, Fac Sci, Dept Geol, El Salam City 43518, Egypt	1	10.26471/cjees/2022/017/207
383	Moghanm, F. S.; Belal, A. B.	Assessment and Mapping of Environmentally Sensitive Areas To Desertification Using Gis in An Area of The North Delta Region of Egypt	Remote sensing; GIS; Environment; Environmental sensitivity; Desertification	THIS STUDY aims to delineate areas in the northern Nile Delta of Egypt that are sensitive to desertification using integrated remote sensing and geographic information systems (GIS). Desertification is one of the fundamental problems associated with land degradation in arid and semi-arid regions. Desertification results from several factors, including climate change, chemical and physical degrada…	[Moghanm, F. S.] Kafrelsheikh Univ, Soil & Water Sci Dept, Fac Agr, Kafr Al Sheikh 33511, Egypt; [Belal, A. B.] Natl Author Remote Sensing & Space Sci, Agr Applicat Soil & Marine Sci Div, POB 1564, Cairo, Egypt	3	10.21608/ejss.2018.4155.1181
384	Ghrefat, Habes; Kahal, Ali Y.; Abdelrahman, Kamal; Alfaifi, Hussain J.; Qaysi, Saleh	Utilization of multispectral landsat-8 remote sensing data for lithological mapping of southwestern Saudi Arabia	Landsat 8; Mapping; Image transform; Saudi Arabia; Spectral measurements; Reflectance	The upper plutonic rocks in southwestern Saudi Arabia has been mapped through Landsat 8 Operational Land Imager (OLI) data. The gathered field rock samples were subjected to spectral measurements (in the range of 0.4-2.5 mm) in the laboratory using a GER 3700 spectroradiometer. Integrated remote sensing techniques, including the band ratio, principal component analysis (PCA), and Gram-Schmidt spe…	[Ghrefat, Habes; Kahal, Ali Y.; Abdelrahman, Kamal; Alfaifi, Hussain J.; Qaysi, Saleh] King Saud Univ, Dept Geol & Geophys, POB 2455, Riyadh 11451, Saudi Arabia; [Abdelrahman, Kamal] Natl Res Inst Astron & Geophys, Seismol Dept, El Marsad St 1, Cairo, Egypt	3	10.1016/j.jksus.2021.101414
385	Green, D. A.; Madhusudhan, N.	Search for radio emission from the exoplanets Qatar-1b andWASP-80b near 150 MHz using the giant metrewave radio telescope	planets and satellites: individual: Qatar-1b; planets and satellites: individual: WASP-80b; radio continuum: planetary systems	We present radio observations made towards the exoplanets Qatar-1b and WASP-80b near 150 MHz with the Giant Meterwave Radio Telescope (GMRT). These targets are relatively nearby irradiated giant exoplanets, a hot Jupiter and a hot Saturn, with sizes comparable to Jupiter but different masses and lower densities. Both the targets are expected to host extended H/He envelopes like Jupiter, with comp…	[Green, D. A.] Cavendish Lab, Astrophys Grp, 19 JJ Thomson Ave, Cambridge CB3 0HE, England; [Madhusudhan, N.] Inst Astron, Madingley Rd, Cambridge CB3 0HA, England	2	10.1093/mnras/staa3208
386	Bondur, V. G.; Zverev, A. T.; Gaponova, E. V.	Precursor Variability of Lineament Systems Detected Using Satellite Images during Strong Earthquakes	satellite images; earthquake precursors; lineaments; rose diagrams; seismically dangerous areas; remote sensing; satellite monitoring	The possibility of using the dynamics of lineament systems as precursors of seismic events has been studied based on the example of strong earthquakes (M >= 5) in California (United States), Peru, Iran, Turkey, Transbaikalia, and Kamchatka, as well as in other regions. The pattern and time intervals of changes in lineament systems during earthquake preparation and occurrence are analyzed. It is s…	[Bondur, V. G.; Zverev, A. T.; Gaponova, E. V.] AEROCOSMOS Res Inst Aerosp Monitoring, Moscow, Russia; [Zverev, A. T.] Moscow State Univ Geodesy & Cartog, Moscow, Russia	5	10.1134/S0001433819090123
387	Sener, Rumeysa; Turk, Tarik	Spatiotemporal Analysis of Cardiovascular Disease Mortality with Geographical Information Systems	Cardiovascular disease; GIS; Cluster analysis; Spatial statistics; Spatiotemporal analysis	In the world, cardiovascular diseases (CVD) are known as the type of disease with the highest mortality. The mortality rate for this disease is very high in Turkey. Therefore, studies on this disease may direct the activities to be carried out by public health workers/policy makers and effective surveillance studies. In this context, GIS-based spatial analysis offers critical tools to reveal the …	[Sener, Rumeysa; Turk, Tarik] Sivas Cumhuriyet Univ, Fac Engn, Dept Geomat Engn, TR-58140 Sivas, Turkey	1	10.1007/s12061-021-09382-7
388	Elfadaly, Abdelaziz; Attia, Wael; Lasaponara, Rosa	Monitoring the Environmental Risks Around Medinet Habu and Ramesseum Temple at West Luxor, Egypt, Using Remote Sensing and GIS Techniques	Environmental risks; Medinet Habu; Ramesseum; Luxor; Remote sensing; GIS	Today, the preservation of cultural heritage is a pressing issue especially for territories subjected to a long period of human action that could adversely influence environment and heritage properties, thus producing a deterioration of archaeological features and alteration of historical landscape. In this paper, the environmental risks and their effects on preservation issues are investigated f…	[Elfadaly, Abdelaziz] Univ Basilicata, UNIBAS, I-85100 Potenza, Italy; [Elfadaly, Abdelaziz; Lasaponara, Rosa] CNR, IMAA, C S Loja 85050 Tito Scalo PZ, Potenza, Italy; [Elfadaly, Abdelaziz; Attia, Wael] Natl Author Remote Sensing & Space Sci, NARSS, Cairo, Egypt	29	10.1007/s10816-017-9347-x
389	Hammer, Emily; Seifried, Rebecca; Franklin, Kathryn; Lauricella, Anthony	Remote assessments of the archaeological heritage situation in Afghanistan	Afghanistan; Cultural heritage; Satellite imagery; Archaeology; Spatial analysis	Analysis of spatial and temporal patterns in looting and destruction at archaeological sites using satellite imagery has become a focus of multiple research groups working on cultural heritage in conflict zones, especially in areas controlled by the Islamic State in Syria and Iraq. In this paper, we apply similar methods to investigate looting and destruction at archaeological sites in the Islami…	[Hammer, Emily] Univ Penn, Univ Chicago, Oriental Inst, Williams Hall,255 South 36th St 847, Philadelphia, PA 19104 USA; [Seifried, Rebecca] Univ Chicago, Oriental Inst, Inst Mediterranean Studies, Fdn Res & Technol Hellas, Chicago, IL 60637 USA; [Franklin, Kathryn; Lauricella, Anthony] Univ Chicago, Oriental Inst, Chicago, IL 60637 USA	25	10.1016/j.culher.2017.12.008
390	Chen, H.; Park, M-H	Assessing vertical and horizontal movements of algal blooms in a coastal water using satellite remote sensing for optimal operation of desalination plants	chlorophyll-a; desalination; harmful algal blooms; red tide; satellite remote sensing	Harmful algal blooms (HABs) are global concerns in coastal waters due to diffuse pollution and climate change. Emerging issues of HABs include their impact on desalination operations for water supply. This study utilizes composite satellite images to detect movement and propagation of algal blooms. Time series images from the Moderate-Resolution Imaging Spectroradiometer (MODIS) were used for mon…	[Chen, H.] Univ Massachusetts, Dept Civil & Environm Engn, Amherst, MA 01003 USA; [Park, M-H] Univ Calif Los Angeles, Dept Civil & Environm Engn, Los Angeles, CA 90095 USA	1	10.2166/ws.2019.092
391	El-Rawy, Mustafa; Fathi, Heba; Abdalla, Fathy	Integration of remote sensing data and in situ measurements to monitor the water quality of the Ismailia Canal, Nile Delta, Egypt	Remote sensing; GIS; In situ measurements; Water quality; Ismailia Canal; Nile Delta; Egypt	The Ismailia Canal is one of the most important tributaries of the River Nile in Egypt. It is threatened by extinction from several sources of pollution, in addition to the intersection and nearness of the canal path with the Bilbayes drain and the effluent from the two largest conventional wastewater treatment plants in Greater Cairo. In this study, the integration of remote sensing and geospati…	[El-Rawy, Mustafa; Fathi, Heba] Menia Univ, Fac Engn, Civil Engn Dept, Al Minya 61111, Egypt; [El-Rawy, Mustafa] Shaqra Univ, Coll Engn, Civil Engn Dept, Dawadmi 11911, Ar Riyadh, Saudi Arabia; [Abdalla, Fathy] King Saud Univ, Riyadh, Saudi Arabia; [Abdalla, Fathy] South Valley Univ, Fac Sci, Geol Dept, Qena, Egypt	8	10.1007/s10653-019-00466-5
392	Youssef, Ahmed M.; Abu-Abdullah, Mazen M.; Abu AlFadail, Emad; Skilodimou, Hariklia D.; Bathrellos, George D.	The devastating flood in the arid region a consequence of rainfall and dam failure: Case study, Al-Lith flood on 23th November 2018, Kingdom of Saudi Arabia	devastating floods; dam failure; inundation; Al-Lith; Kingdom of Saudi Arabia	On November 23, 2018, cascading rainfall events that occurred in the upstream section of wadi Al-Lith, which is located in the western part of the Kingdom of Saudi Arabia, caused a failure in the Al-Lith earthen dam. This event was followed by a large-scale devastating flood that inundated the area downstream of the dam, damaging infrastructure and property. The main scope of this work was to ide…	[Youssef, Ahmed M.] Sohag Univ, Fac Sci, Geol Dept, Sohag 82524, Egypt; [Youssef, Ahmed M.; Abu-Abdullah, Mazen M.; Abu AlFadail, Emad] Saudi Geol Survey, Geol Hazards Dept, Appl Geol Sect, Jeddah 21514, Saudi Arabia; [Skilodimou, Hariklia D.] Natl & Kapodistrian Univ Athens, Fac Geol & Geoenvironm, Dept Geog & Climatol, Univ Campus, Athens 15784, Greece; [Bathrellos, George D.] Univ Patras, Dept…	11	10.1127/zfg/2021/0672
393	Sadek, Mohammed; Li, Xuxiang	Low-Cost Solution for Assessment of Urban Flash Flood Impacts Using Sentinel-2 Satellite Images and Fuzzy Analytic Hierarchy Process: A Case Study of Ras Ghareb City, Egypt		Natural hazards are indeed counted as the most critical challenges facing our world, represented in floods, earthquakes, volcanoes, hurricanes, and forest fires. Among these natural hazards, the flash flood is regarded the most frequent. In this work, we utilized two Sentinel-2 satellite images, before and after the flash flood, SRTM and photos captured by using a helicopter. This paper aims at t…	[Sadek, Mohammed; Li, Xuxiang] Xi An Jiao Tong Univ, Sch Human Settlements & Civil Engn, Xian 710049, Shaanxi, Peoples R China	9	10.1155/2019/2561215
394	Habib, Shaimaa Magdy; Suliman, Ahmed El-Raie Emam; Al Nahry, Alaa Hassan; Rahman, Eid Nasr Abd El	Spatial modeling for the optimum site selection of solar photovoltaics power plant in the northwest coast of Egypt	Remote sensing; GIS; Multi-criteria decision making; Photovoltaics power plants; Egypt	The unbalanced distribution of the Egyptian population causes serious social and economic problems. Redistributing population density to fully utilize the uninhabited areas like desert regions is very critical. This requires discovering renewable energy and water resources, to achieve an optimal goal of the sustainable national strategy. Therefore, this paper aims to define the most suitable loca…	[Habib, Shaimaa Magdy; Rahman, Eid Nasr Abd El] Natl Author Remote Sensing & Space Sci NARSS, Sci Training & Continuous Studies Dept, Cairo, Egypt; [Suliman, Ahmed El-Raie Emam; Al Nahry, Alaa Hassan] Cairo Univ, Fac Agr, Agr Engn Dept, Cairo, Egypt	34	10.1016/j.rsase.2020.100313
395	Moradpour, Hooman; Paydar, Ghodratollah Rostami; Pour, Amin Beiranvand; Kamran, Khalil Valizadeh; Feizizadeh, Bakhtiar; Muslim, Aidy M.; Hossain, Mohammad Shawkat	Landsat-7 and ASTER remote sensing satellite imagery for identification of iron skarn mineralization in metamorphic regions	Landsat-7; ASTER; iron skarn mineralization; Galali skarn region; Iran	The use of satellite remote sensing imagery for mineral exploration is a fast and low-cost approach for indicating high potential zones. Exploration of iron skarn mineralization in metamorphic regions is challenging during the fieldwork campaign. In this study, Landsat-7 and Advanced Spaceborne Thermal Emission and Reflection Radiometer (ASTER) satellite imagery were used for mapping alteration z…	[Moradpour, Hooman; Kamran, Khalil Valizadeh; Feizizadeh, Bakhtiar] Univ Tabriz, Dept Remote Sensing & GIS, Tabriz, Iran; [Paydar, Ghodratollah Rostami] Islamic Azad Univ, Dept Geol, Ahvaz Branch, Ahvaz, Iran; [Pour, Amin Beiranvand; Muslim, Aidy M.; Hossain, Mohammad Shawkat] Univ Malaysia Terengganu UMT, Inst Oceanog & Environm INOS, Terengganu, Malaysia	17	10.1080/10106049.2020.1810327
396	Aljahdali, Mohammed H.; Elhag, Mohamed	Calibration of the depth invariant algorithm to monitor the tidal action of Rabigh City at the Red Sea Coast, Saudi Arabia	astronomical tide; bathymetry; regression coefficient; water column; wind speed	Rabigh is a thriving coastal city located at the eastern bank of the Red Sea, Saudi Arabia. The city has suffered from shoreline destruction because of the invasive tidal action powered principally by the wind speed and direction over shallow waters. This study was carried out to calibrate the water column depth in the vicinity of Rabigh. Optical and microwave remote sensing data from the Europea…	[Aljahdali, Mohammed H.] King Abdulaziz Univ, Fac Marine Sci, Marine Geol Dept, POB 80200, Jeddah 21589, Saudi Arabia; [Elhag, Mohamed] King Abdulaziz Univ, Fac Meteorol Environm & Arid Land Agr, Dept Hydrol & Water Resources Management, Jeddah 21589, Saudi Arabia; [Elhag, Mohamed] Chinese Acad Sci, Inst Remote Sensing & Digital Earth RADI, Beijing 100094, Peoples R China; [Elhag, Mohamed] German…	1	10.1515/geo-2020-0217
397	Ozdemir, Ibrahim; Yilmaz, Salih	Modeling litter mass using satellite NDVI images and environmental variables in a brutian pine forest located in the southwest of Turkey	litter; carbon; remote sensing; biomass; climate change	Litter mass (LM) on the forest floor is an important component of the carbon (C) cycle in forest ecosystems. A considerably amount of LM is accumulated in the conifer forests in the Mediterranean Region of Turkey. Therefore, LM should be considered to estimate above ground biomass (AGB) more accurately in these forests. Rapid and affordable methods are necessary for LM inventory. Satellite remote…	[Ozdemir, Ibrahim] Isparta Univ Appl Sci, Fac Forestry, Dept Wildlife Ecol & Management, TR-32260 Isparta, Turkey; [Yilmaz, Salih] Antalya Forest Reg Directorate, Eleventh Forest Management Dept, Antalya, Turkey	3	10.1080/17583004.2020.1735917
398	Bouamrane, Ali; Derdous, Oussama; Dahri, Noura; Tachi, Salah-Eddine; Boutebba, Khereddine; Bouziane, Mohamed T.	A comparison of the analytical hierarchy process and the fuzzy logic approach for flood susceptibility mapping in a semi-arid ungauged basin (Biskra basin: Algeria)	AHP; Biskra river basin; FAHP; flood susceptibility areas; GIS; RS	The study presented herein proposes a multi-criteria decision-making tool to identify flood susceptibility areas on a regional scale. The adopted approach is based on the integration of multi-criteria analysis, geographical information systems (GIS) and remote sensing (RS) techniques. Accordingly, flood susceptibility maps were prepared depending on information from six flood-conditioning factors…	[Bouamrane, Ali; Derdous, Oussama] Univ Kasdi Merbah, Fac Appl Sci, Dept Civil & Hydraul Engn, Ouargla, Algeria; [Bouamrane, Ali] Lab Management Maintenance & Rehabil Facil & Urba, Souk Ahras, Algeria; [Derdous, Oussama; Tachi, Salah-Eddine] Natl Polytech Sch, Lab Rech Sci Leau, Algiers, Algeria; [Dahri, Noura] Univ Sfax, GEOMODELE Lab, Fac Sci, Sfax, Tunisia; [Boutebba, Khereddine] Univ Mohamed …	10	10.1080/15715124.2020.1830786
399	Al Ramahi, Fouad K. Mashee; Al Bahadly, Zina Khalil Ibrahim	The Spatial Analysis for Bassia eriophora (Schrad.) Asch. Plant Distributed in all IRAQ by Using RS & GIS Techniques	Bassia eriophora plant; HotSpot Techniques; Plant Distributions; RS & GIS Techniques; Spatial Analysis	Most vegetation's are Land cover (LC) for the globe, and there is an increased attention to plants since they represent an element of balance to natural ecology and maintain the natural balance of rapid changes due to systematic and random human uses, including the subject of the current study (Bassia eriophora) Which represent an essential part of the United Nations system for land cover classif…	[Al Ramahi, Fouad K. Mashee] Baghdad Univ, Coll Sci, Remote Sensing Unit, Baghdad, Iraq; [Al Bahadly, Zina Khalil Ibrahim] Al Mustansriya Univ, Coll Sci, Dept Biol, Baghdad, Iraq	2	10.21123/bsj.2020.17.1.0126
400	Javed, Salim; ElAlQamy, Husam; Khan, Shahid Bashir; Ahmed, Shakeel; Al Dhaheri, Shaikha Salem; Al Hammadi, Abdullah; Al Hammadi, Eissa	Using greater flamingo tracking and count data in delineating marine protected areas in the coastal zone of Abu Dhabi, United Arab Emirates: Conservation planning in an economically important area	Greater Flamingo Phoenicopterus roseus; Satellite tracking; Conservation planning; Zoning; Marxan; United Arab Emirates	Systematic conservation planning is essential in the justification and design of protected areas, especially in an era where every piece of land or water is at a high premium. We used satellite tracking data and regular monitoring of Greater flamingos into the spatial prioritization planning tool Marxan to identify the most important zones for the conservation of the greater flamingo and many oth…	[Javed, Salim; ElAlQamy, Husam; Khan, Shahid Bashir; Ahmed, Shakeel; Al Dhaheri, Shaikha Salem; Al Hammadi, Abdullah; Al Hammadi, Eissa] Environm Agcy Abu Dhabi, POB 45553, Abu Dhabi, U Arab Emirates	7	10.1016/j.gecco.2019.e00557
401	Pilcher, Nicolas James; Rodriguez-Zarate, Clara Jimena; Antonopoulou, Marina A.; Mateos-Molina, Daniel; Das, Himansu Sekhar; Bugla, Ibrahim Abdullah	Combining laparoscopy and satellite tracking: Successful round-trip tracking of female green turtles from feeding areas to nesting grounds and back	Chelonia mydas; Green sea turtles; Habitat connectivity; Satellite tracking; Laparoscopy; Oman; United Arab Emirates	Adult sea turtles undertake periodic long-distance migrations between foraging and nesting areas during breeding migrations, and an understanding the connectivity between these two important habitats can contribute to efficient conservation planning. We present the first round-trip migrations of three green sea turtles in the Arabian region, from a foraging area to a nesting site and back, along …	[Pilcher, Nicolas James] Marine Res Fdn, 136 Lorong Pokok Seraya 2, Kota Kinabalu, Sabah, Malaysia; [Rodriguez-Zarate, Clara Jimena; Antonopoulou, Marina A.; Mateos-Molina, Daniel] Emirates Nat WWF, POB 45553, Abu Dhabi, U Arab Emirates; [Das, Himansu Sekhar; Bugla, Ibrahim Abdullah] Environm Agcy Abu Dhabi, POB 45553, Abu Dhabi, U Arab Emirates	11	10.1016/j.gecco.2020.e01169
402	Mohamed, Soha A.	Application of geo-spatial Analytical Hierarchy Process and multi-criteria analysis for site suitability of the desalination solar stations in Egypt	Geographic information systems (GIS); Multi-criteria analysis (MCA); Analytical hierarchy process (AHP); Desalination; Solar energy; Site suitability	Water is the most crucial inputs for sustainable development. Water shortage is the primary current and future world issue. Egypt is facing a severe water crisis dilemma in recent years. The rapid population growth and economic development in Egypt lead to increasing pollution and environmental degradation of water quality, availability, and accessibility. Climate change could worsen the crisis. …	[Mohamed, Soha A.] MHESR, HITHC, Cairo, Egypt	13	10.1016/j.jafrearsci.2020.103767
403	Fernando Rodrigo, Juan; Gil, Jorge; Salvador, Pablo; Gomez, Diego; Sanz, Julia; Luis Casanova, Jose	Analysis of Spatial and Temporal Variability in Libya-4 with Landsat 8 and Sentinel-2 Data for Optimized Ground Target Location	PICS; Libya-4; CEOS; Coefficient of Variation; Quasi-Newton Optimization; Basin-Hopping; Landsat 8; Sentinel 2	Pseudo-Invariant Calibration Sites (PICS) have been widely used by the remote sensing community in recent decades for post-launch absolute calibration, cross-calibration, and the monitoring of radiometric stability. The Committee on Earth Observation Satellites (CEOS) has established several official PICS for these purposes. Of these, Libya-4 is the most commonly used, due to its high uniformity …	[Fernando Rodrigo, Juan; Salvador, Pablo; Gomez, Diego; Sanz, Julia; Luis Casanova, Jose] Univ Valladolid, Remote Sensing Lab LATUV, Paseo Belen 11, E-47011 Valladolid, Spain	3	10.3390/rs11242909
404	Al-Ruzouq, Rami; Shanableh, Abdallah; Khalil, Mohamad Ali; Zeiada, Waleed; Hamad, Khaled; Abu Dabous, Saleh; Gibril, Mohamed Barakat A.; Al-Khayyat, Ghadeer; Kaloush, Kamil E.; Al-Mansoori, Saeed; Jena, Ratiranjan	Spatial and Temporal Inversion of Land Surface Temperature along Coastal Cities in Arid Regions	urban heat island; remote sensing; GIS; land surface temperature; urbanization; hot climate region	Climate change is undoubtedly affecting the global weather of the Earth. Rapid human civilization has mainly caused this in the last few decades. This research examined the spatial and temporal land surface temperature (LST) in the United Arab Emirates (UAE) coastal cities located in an arid region that faced massive urbanization over the last 50 years. We estimated the LST using by-products of L…	[Al-Ruzouq, Rami; Shanableh, Abdallah; Zeiada, Waleed; Hamad, Khaled; Abu Dabous, Saleh] Univ Sharjah, Dept Civil & Environm Engn, Sharjah 27272, U Arab Emirates; [Al-Ruzouq, Rami; Shanableh, Abdallah; Khalil, Mohamad Ali; Zeiada, Waleed; Hamad, Khaled; Abu Dabous, Saleh; Gibril, Mohamed Barakat A.; Al-Khayyat, Ghadeer; Jena, Ratiranjan] Res Inst Sci & Engn, Sharjah 27272, U Arab Emirates; [Zeiad…	2	10.3390/rs14081893
405	Yousefi, Hossein; Hafeznia, Hamed; Yousefi-Sahzabi, Amin	Spatial Site Selection for Solar Power Plants Using a GIS-Based Boolean-Fuzzy Logic Model: A Case Study of Markazi Province, Iran	site selection; solar energy; fuzzy; GIS; Iran	Selection of suitable sites for solar power plants requires spatial evaluation taking technical, economic, and environmental considerations into account. This research has applied a fuzzy logic model to carry out spatial site selection for solar power plants in Markazi Province of Iran. Geographical Information System (GIS) capabilities have been used for spatial analysis and visualization of the…	[Yousefi, Hossein; Hafeznia, Hamed] Univ Tehran, Fac New Sci & Technol, Dept Renewable Energies & Environm Engn, Tehran, Iran; [Yousefi-Sahzabi, Amin] Ton Duc Thang Univ, Dept Management Sci & Technol Dev, Ho Chi Minh City, Vietnam; [Yousefi-Sahzabi, Amin] Ton Duc Thang Univ, Fac Environm & Labour Safety, Ho Chi Minh City, Vietnam	57	10.3390/en11071648
[truncated: 6,242 more rows]
